1 **TITLE**

2

3 **CSF1R inhibitor levels determine sex-specific phenotype of resilient microglia and**  
4 **neurofunctional rescue leading to extended survival in tauopathy mice**

5

6 **AUTHORS**

7 Noah R. Johnson<sup>1,2†</sup>, Peng Yuan<sup>1,3†</sup>, Erika Castillo<sup>1</sup>, T. Peter Lopez<sup>1</sup>, Weizhou Yue<sup>1</sup>, Annalise  
8 Bond<sup>1</sup>, Brianna M. Rivera<sup>1</sup>, Miranda C. Sullivan<sup>1</sup>, Masakazu Hirouchi<sup>1,4</sup>, Kurt Giles<sup>1,5</sup>, Atsushi  
9 Aoyagi<sup>1,4</sup>, and Carlo Condello<sup>1,5†\*</sup>

10 <sup>1</sup> Institute for Neurodegenerative Diseases, UCSF Weill Institute for Neurosciences, University  
11 of California, San Francisco, CA 94158, USA.

12 <sup>2</sup> University of Colorado Alzheimer's and Cognition Center, Linda Crnic Institute for Down  
13 Syndrome, Department of Neurology, University of Colorado Anschutz Medical Campus,  
14 Aurora, CO 80045, USA.

15 <sup>3</sup> Department of Rehabilitation Medicine, Huashan Hospital, State Key Laboratory of Medical  
16 Neurobiology, Institute for Translational Brain Research, MOE Frontiers Center for Brain  
17 Science, Fudan University, Shanghai 200032, China.

18 <sup>4</sup> Daiichi Sankyo Co., Ltd., Tokyo, 140-8710, Japan.

19 <sup>5</sup> Department of Neurology, UCSF Weill Institute for Neurosciences, University of California, San  
20 Francisco, CA 94158, USA.

21

22 †N.J., P.Y. and C.C. contributed equally to this work. \*Correspondence to:  
23 carlo.condello@ucsf.edu

24

25

26

## 27 **ABSTRACT**

28 Microglia are central to pathogenesis in many neurological conditions. Drugs targeting colony-  
29 stimulating factor-1 receptor (CSF1R) to block microglial proliferation in preclinical disease  
30 models have shown mixed outcomes, thus the therapeutic potential of this approach remains  
31 unclear. Here, CSF1R inhibitors were evaluated in tauopathy mice using multiple dosing  
32 schemes, drug analogs, and longitudinal measurements in the brain and plasma. A sex-  
33 independent reduction in pathogenic tau was seen in several models and non-microglial gene  
34 expression patterns reverted toward a normal wild type signature. Surprisingly, despite greater  
35 drug exposure in male mice, functional rescue and extended survival was only observed in  
36 female mice. A dose-dependent upregulation of immediate early genes was observed in male  
37 mice only, indicating excitotoxicity that may have precluded functional benefits. Drug-resilient  
38 microglia in male mice exhibited morphological and gene expression patterns consistent with  
39 increased neuroinflammatory signaling, suggesting a mechanistic basis for sex-specific  
40 excitotoxicity. These data argue that complete microglial ablation is neither required nor  
41 desirable for neuroprotection and that therapeutics targeting microglia must consider sex-  
42 dependent effects on functional outcomes.

43

## 44 **INTRODUCTION**

45 Microglia, the resident innate immune cells of the central nervous system (CNS), are important  
46 for neurodevelopment and homeostasis, and are a fundamental component to pathogenesis in  
47 many neurological conditions. We now appreciate that microglia are heterogeneous cells, are  
48 influenced by the periphery, have sex-dependent biology, and can be helpful or harmful  
49 depending on the disease stage or specific pathology<sup>1-4</sup>. Gene mutations affecting the  
50 expression and sequence of microglial genes (e.g. *TREM2*, *CD33*, and *MS4A*) increase risk for  
51 Alzheimer's disease (AD), and implicate microglia in several disease pathways including toxic  
52 protein aggregation (A $\beta$  and tau) and neuroinflammation<sup>5,6</sup>. Thus, for the first time, there is  
53 unequivocal evidence in humans that certain microglial functions are robustly involved in the  
54 pathogenesis of neurodegenerative disease. However, the precise mechanisms governing  
55 microglia function in disease are still not well understood.

56 In tauopathy (a family of neurodegenerative disorders characterized by tau inclusions in neural  
57 cells), there is growing evidence that microglia play an early and constant role in tau

58 aggregation and neuronal loss. Disease-activated microglia can secrete pro-inflammatory  
59 cytokines that regulate neuronal kinases and phosphatases causing tau hyperphosphorylation,  
60 aggregation and consequent neurodegeneration<sup>7-9</sup>. Genome-wide transcriptomic studies have  
61 identified innate immune pathways that implicate early and robust involvement of microglia in  
62 human tauopathy<sup>10,11</sup> and related mouse models<sup>12,13</sup>. Deletion of microglia-specific genes or  
63 genetic ablation of microglial cells in rodents have been useful approaches to dissect microglia-  
64 mediated mechanisms in disease models, but pharmacologic tools to more dynamically  
65 manipulate microglial function have been limited. Recently developed small-molecule drugs  
66 targeting colony-stimulating factor-1 receptor (CSF1R), a receptor kinase critical for survival and  
67 proliferation of CNS microglia, peripheral tissue macrophages and blood myeloid cells<sup>14</sup>, are  
68 approved for clinical use in various oncology indications<sup>15</sup>, and have now been adopted by the  
69 neuroscience community to study microglia biology. In the past few years, there have been  
70 numerous studies using CSF1R inhibitors in models of neurological disease, but only a few  
71 studies in models of primary tauopathy<sup>16-19</sup>. While important first steps, these studies only  
72 explored single, static time points of treatment, or used only one sex. Given the dynamic nature  
73 and complexity of microglial activation, the timing of CSF1R inhibition in tauopathy and its  
74 translational relevance is still an open question.

75 Thus, the goal of our study was to define a therapeutic window that not only reduced  
76 pathological markers, but also led to functional improvement. Moreover, we questioned whether  
77 complete or continuous microglial ablation using CSF1R inhibitors was necessary given the  
78 important and diverse roles these cells play in brain health and disease. Here, we systematically  
79 test CSF1R inhibition using multiple drug analogs at several time points in transgenic mice  
80 developing spontaneous tauopathy, and in an inoculation model of induced tauopathy. We  
81 demonstrate a reduction of tau pathology in multiple dosing schemes without complete  
82 microglial ablation; drug exposure levels correlated with the extent of tau-prion<sup>20</sup> and microglial  
83 reduction. Surprisingly, we observed suppressed plasma biomarkers of neurodegeneration,  
84 rescue of aberrant behavior, and extended survival in female mice only. These data reveal a  
85 previously unrecognized sex-dependent therapeutic benefit of pharmacological CSF1R  
86 inhibition. Transcriptome analyses showed that treated tauopathy mice exhibited a restored  
87 gene expression profile similar to wild type mice; however, we observed a specific module of  
88 sex- and drug concentration-dependent gene expression that might explain the lack of  
89 functional rescue in male mice. Interestingly, residual microglia had a morphology similar to wild  
90 type microglia and their gene expression pattern indicated a unique, homeostatic-like signature

91 that was not responsive to tauopathy nor CSF1R inhibition. These data highlight yet another  
92 context for microglial heterogeneity with implications for novel microglial biology, and argue that  
93 tempering microglial activation with drugs, rather than cellular ablation, is a better therapeutic  
94 strategy with clinical relevance.

## 95 **RESULTS**

### 96 **CSF1R inhibition reduces pathogenic tau in the brains of Tg2541 mice**

97 Building on previous findings<sup>16-19</sup>, we first evaluated the effect of CSF1R inhibition on the levels  
98 of pathogenic tau in the brains of transgenic mice expressing human tau, using a cell-based tau-  
99 prion bioassay, enzyme-linked immunosorbent assay (ELISA), and immunohistochemical (IHC)  
100 analysis. To deplete microglia, Tg2541 mice were dosed with one of two potent, orally  
101 bioavailable, and brain-penetrant CSF1R inhibitors: PLX3397 (pexidartinib), which binds  
102 receptor tyrosine kinases CSF1R, and to lesser extent, KIT and FLT3<sup>21</sup>, and PLX5622, which  
103 selectively binds CSF1R<sup>22</sup>. Three different treatment paradigms were evaluated: acute (2–4  
104 months old), chronic (2–7 months old), and terminal (2 months old until death) (Fig. 1a–c).  
105 Transgenic B6-Tg(Thy1-MAPT\*P301S)2541 mice<sup>23</sup>, referred to here as Tg2541 mice, express  
106 the 0N4R isoform of human tau with the familial frontotemporal lobar degeneration (FTLD)-  
107 linked P301S mutation<sup>24</sup>, which increases its aggregation propensity and prion-like  
108 characteristics<sup>25,26</sup>. We previously demonstrated that the levels of pathogenic tau in hindbrain  
109 regions of Tg2541 mice were greater than in forebrain regions<sup>27</sup>. This observation is consistent  
110 with the neuropathological staging of human FTLD and specifically of progressive supranuclear  
111 palsy (PSP) where tau deposition begins and predominates in subcortical and brainstem  
112 nuclei<sup>28</sup>. Therefore, the forebrain and hindbrain regions were examined separately in this study  
113 (Fig. 1d).

114 We confirmed that CSF1R inhibition effectively reduced microglial markers Iba1 and P2YR12 by  
115 an average of ~60% in both the forebrains and hindbrains of Tg2541 mice compared to vehicle  
116 treatment, and that they had similar effects in the brains of C57BL/6J wild type mice  
117 (Supplementary Fig. 1a–p). Principal component analysis of all Iba1 and P2YR12 data  
118 combined showed that sex did not have a significant effect on the extent of microglial depletion  
119 by CSF1R inhibitors (Supplementary Fig. 1q and Supplementary Data File 1), and therefore  
120 male and female mice were grouped together for analysis unless otherwise noted.

121 We next employed a reproducible and rapid cell-based bioassay<sup>27,29,30</sup> to measure the activity of

122 replication-competent tau-prions in brain homogenates from Tg2541 mice. To ensure an  
123 appropriate dynamic range in this bioassay, we optimized for dilution factor and assay duration  
124 using aged Tg2541 mouse brain samples, which showed greater than 100-fold higher signal  
125 than wild type mouse brain samples (Supplementary Fig. 2). Following acute, chronic, or  
126 terminal treatment with PLX3397 or PLX5622, tau-prion activity in the forebrains of Tg2541 mice  
127 was significantly decreased compared to vehicle-treated mice (Fig. 1e–g).  
128 Hyperphosphorylation and aggregation of tau occurs first in hindbrain regions of Tg2541 mice,  
129 especially in the brainstem and spinal cord, leading to motor deficits caused by severe  
130 paraparesis<sup>23</sup>. This is consistent with our previous report of early and aggressive tau-prion  
131 activity in hindbrain regions of Tg2541 mice<sup>27</sup>; as such, we found that acute CSF1R inhibition  
132 was insufficient to reduce tau-prion activity in the hindbrain (Fig. 1e). However, chronic or  
133 terminal treatment with PLX3397 did significantly reduce tau-prion activity in hindbrain regions  
134 (Fig. 1f,g) and the spinal cords of Tg2541 mice (Supplementary Fig. 3). To examine other  
135 markers of pathogenic tau, we measured the levels of tau phosphorylated at Ser396 (pS396) by  
136 ELISA, and tau phosphorylated at Ser202/Thr205 (pS202/T205) by IHC. Acute, chronic, or  
137 terminal PLX3397 treatment robustly reduced pS396 tau in both forebrain and hindbrain regions  
138 of Tg2541 mice (Fig. 1h–j), and also reduced pS202/T205 tau in forebrain regions (Fig. 1k–m)  
139 and in the spinal cord (Supplementary Fig. 3d). Since the various measures of tau pathology  
140 represent different steps of tau pathogenesis (hyperphosphorylation vs. oligomerization vs.  
141 filament formation), they may be differentially impacted by CSF1R inhibition with different  
142 treatment regimens. Thus, to consider all tau measurements and both brain regions together,  
143 we performed principal component analysis which revealed that pathogenic tau was reduced by  
144 both CSF1R inhibitors, and that there was no significant effect of sex on drug efficacy (Fig. 1n  
145 and Supplementary Data File 1).

146 Having verified the benefits of microglial depletion at an early disease stage, we next wondered  
147 whether initiating CSF1R inhibition at a more advanced stage of disease would have similar  
148 effects, simulating an interventional drug treatment. Thus, we dosed Tg2541 mice with PLX3397  
149 in a delayed treatment paradigm (4–7 months old). Similar to terminal treatment, interventional  
150 treatment also significantly reduced tau-prion activity in both the forebrain and hindbrain  
151 (Supplementary Fig. 4a,b). Although pS396 tau levels were unchanged after interventional  
152 treatment, levels of tau phosphorylated at Thr231 (pT231) were reduced in the forebrain  
153 (Supplementary Fig. 4c,d). Considering the potential off-target effects of continuous, long-term  
154 microglial depletion on brain function, we also wondered whether periodic CSF1R inhibition

155 might provide a safer, yet similarly efficacious therapy. Thus, we also tested PLX3397 dosed  
156 intermittently by repeating dosing cycles of three weeks on followed by three weeks off. The  
157 intermittent dosing interval was selected based on prior studies showing that there is rapid  
158 microglial repopulation of the brain, and that morphological and transcriptional changes in the  
159 microglia return to baseline levels within 21 days of removing PLX<sup>31</sup>. Intermittent treatment  
160 produced similar reductions in the levels of microglial markers in both brain regions as for  
161 continuous treatment (Supplementary Fig. 1r-t), but tau-prion activity and pT231 levels were  
162 reduced only in the forebrain (Supplementary Fig. 4e-h). Taken together, these data suggest  
163 that intermittent/interventional dosing is sufficient to reduce pathogenic tau in the forebrain of  
164 Tg2541 mice, likely due to slower disease kinetics; however, continuous CSF1R inhibition is  
165 necessary for the extended reduction of pathogenic tau in the hindbrain.

166 Tau has been shown to propagate throughout the brain in a prion-like fashion along  
167 interconnected neural networks<sup>32,33</sup>. To test the hypothesis that microglial depletion may reduce  
168 the propagation of tau-prions<sup>20</sup> in the brains of Tg2541 mice, we inoculated fibrils of the  
169 microtubule-binding repeat domain of tau, referred to as K18 fibrils<sup>34</sup>, into the hippocampus and  
170 overlying cortex (forebrain regions) of Tg2541 mice and then treated them with PLX3397.  
171 Compared to un-inoculated mice, K18-inoculated mice had significantly increased tau-prion  
172 levels in the ipsilateral (inoculated) forebrain, as well as in the contralateral forebrain and in the  
173 hindbrain (Supplementary Fig. 5), which suggests that tau-prions had propagated from the  
174 inoculation site to those brain regions. However, acute PLX treatment was sufficient to  
175 significantly reduce tau-prion levels in the ipsilateral forebrain and hindbrain, as well as in the  
176 contralateral forebrain. Furthermore, tau-prion levels in the contralateral forebrain of PLX-  
177 treated mice were not significantly different from the forebrain of un-inoculated, vehicle-treated  
178 mice (Supplementary Fig. 5), which indicates that CSF1R inhibition prevented the spreading of  
179 tau-prions from the inoculation site to this brain region.

180 CSF1R inhibition can affect peripheral immune cells such as blood myeloid cells and tissue  
181 macrophages, in addition to microglia<sup>17,35</sup>. To determine if the effects of PLX3397 and PLX5622  
182 on pathogenic tau in the brain are due, at least in part, to depletion of peripheral CSF1R-  
183 expressing cells we dosed Tg2541 mice with PLX73086<sup>36</sup>, a non-brain penetrant CSF1R  
184 inhibitor analog of PLX3397 and PLX5622. Chronic treatment with PLX73086 had no significant  
185 effect on microglial markers Iba1 and P2YR12, or on levels of tau-prions or pTau[S396] or  
186 pTau[T231] in the forebrain or hindbrain of Tg2541 mice (Supplementary Fig. 6). Therefore, the  
187 effects of CSF1R inhibitors in peripheral compartments do not significantly contribute to their

188 reduction of pathogenic tau in the CNS. We also evaluated the numbers of Iba1<sup>+</sup>/CD206<sup>+</sup>  
189 perivascular macrophages (PVMs) and found that PLX3397 treatment did not significantly  
190 deplete this cellular population, although there was a trend ( $P = 0.0947$ ) towards reduced PVMs  
191 in female Tg2541 mice (Supplementary Fig. 7). Lastly, because there is limited data for CSF1R  
192 expression in neurons after injury<sup>37</sup>, we considered whether PLX3397 or PLX5622 might affect  
193 neurons or their expression of tau protein in Tg2541 mice. Acute, chronic, and terminal CSF1R  
194 inhibition did not significantly reduce levels of neuronal nuclei (NeuN), detected by IHC, or total  
195 tau, detected by ELISA (Supplementary Fig. 8). Therefore, CSF1R inhibitors do not directly  
196 affect measures of neuronal viability or tau expression, consistent with a prior report using  
197 PLX3397 in cultured primary neurons<sup>17</sup>. Together, these data confirm that drug effects on  
198 biological and functional end points are due to inhibition of CSF1R in CNS microglia.

### 199 **CSF1R inhibition extends survival in female Tg2541 mice**

200 We next focused on the terminal treatment paradigm with PLX3397 to evaluate the long-term  
201 effects of CSF1R inhibition on lifespan and behavior. Tg2541 mice develop paraparesis from  
202 5–6 months of age which makes feeding difficult, resulting in a loss of body weight and thus, a  
203 greatly reduced lifespan compared to wild type mice. We found that terminal PLX treatment  
204 significantly extended the median survival of female Tg2541 mice [16.5 days longer median  
205 survival;  $P = 0.0004$ ], but not male Tg2541 mice, compared to vehicle treatment (Fig. 2a,b). The  
206 extended survival in PLX-treated female mice was preceded by significantly reduced weight  
207 loss, which was not observed in male mice (Fig. 2c). Body weight at 180 days of age,  
208 irrespective of treatment, was predictive of lifespan in female mice but not in male mice, with  
209 less weight loss being correlated with longer survival (Fig. 2d). Lower forebrain tau-prion levels  
210 were also correlated with longer survival in female mice but not in male mice (Fig. 2e),  
211 suggesting that Tg2541 mice have a sex-specific physiological response to tauopathy. To  
212 confirm the effect of PLX treatment on survival in a different experimental paradigm, we used a  
213 midbrain inoculation model. Since Tg2541 mice spontaneously develop substantial tau  
214 pathology in the midbrain<sup>27</sup>, we predicted that K18 inoculation in the midbrain would accelerate  
215 and synchronize the disease course, which would be ideal for studying mouse survival. Indeed,  
216 female Tg2541 mice inoculated with K18 tau fibrils died significantly earlier than mice inoculated  
217 with diluent, though no difference was observed in male mice (Fig. 2f,g). Consistent with our  
218 prior result, PLX treatment significantly extended the median survival of female mice inoculated  
219 with K18 tau fibrils [29.5 days longer median survival;  $P = 0.0095$ ], but not male mice, compared  
220 to vehicle treatment (Fig. 2h). Taken together, these data indicate that CSF1R inhibition robustly

221 extends the lifespan of female Tg2541 mice, even during an accelerated disease course.

## 222 **CSF1R inhibition reduces aberrant behavioral phenotypes in Tg2541 mice**

223 To examine the relationship between drug exposure and markers of disease progression more  
224 closely, we collected blood plasma at monthly intervals from mice receiving terminal treatment  
225 with PLX3397 or vehicle (Fig. 3a). Consistent with previous reports<sup>17</sup>, male Tg2541 mice had  
226 higher plasma (25.3%;  $P < 0.0001$ ) and brain (44.9%;  $P = 0.0250$ ) concentrations of PLX than  
227 did female mice (Fig. 3b and Supplementary Fig. 9a–c); we also observed this difference in wild  
228 type mice (Supplementary Fig. 9d,e). Male and female mice had *ad libitum* access to food, and  
229 had similar rates of food consumption relative to body weight, independent of whether it  
230 contained PLX or vehicle (Supplementary Fig. 10a,b). However, female mice were consistently  
231 more active than male mice (Supplementary Fig. 10c,d). Thus, the reduced PLX exposure in  
232 female mice is likely due to a higher metabolic and drug clearance rate compared with male  
233 mice. In line with the hypothesis that drug exposure was excessive in male mice, we observed a  
234 trend towards reduced body weight in male wild type mice receiving terminal PLX treatment, but  
235 not in female wild type mice (Supplementary Fig. 9f). In spite of this sex-specific difference in  
236 PLX exposure, we found that higher plasma concentrations of PLX were correlated with greater  
237 microglial depletion in both forebrain and hindbrain regions, independent of sex (Fig. 3c).  
238 Furthermore, higher PLX exposure was correlated with reduced tau-prion levels in the forebrain  
239 regions of both male and female mice (Fig. 3d). Together, these data indicate that PLX has  
240 dose-dependent on-target effects in both male and female mice.

241 Previous studies have demonstrated a common hyperactive phenotype in the early stages of  
242 tauopathy in transgenic rodent models<sup>38,39</sup>. While the precise mechanism that leads to this  
243 deficit is unclear, this phenotype is causally linked with tau aggregate burden<sup>40</sup>. Based on the  
244 reduction of tau deposition we observed with PLX treatment, we sought to also examine its  
245 effect on this hyperactive phenotype. Using an automated home-cage monitoring system, we  
246 longitudinally tracked the activity levels in Tg2541 mice at different ages, measuring their  
247 amounts of rearing, locomotion, and wheel running. We confirmed the previous reports, finding  
248 that at early ages the Tg2541 mice displayed a hyperactive phenotype relative to wild type mice  
249 (90–150 days old in females, 90–120 days old in males), while at later ages their activity was  
250 significantly reduced (Fig. 3e), likely due to the accumulation of pathogenic tau in brain regions  
251 associated with motor function. PLX treatment led to a consistent reduction in Tg2541 mouse  
252 hyperactivity, but did not change their hypoactivity at later ages (Fig. 3e), indicating the activity



253 reduction is not due to a general weakening effect. Detailed examination of the individual activity  
254 measurements revealed that PLX treatment normalized the amounts of wheel running (Fig. 3f)  
255 and active time (Fig. 3g). These data indicate that PLX treatment corrects the aberrant behavior  
256 of Tg2541 mice towards that of wild type mice.

### 257 **Sex-dependent effects of CSF1R inhibition on a biomarker of CNS injury**

258 To further interrogate CNS damage caused by tauopathy, or potentially caused by the observed  
259 sex-dependent PLX exposure, we also evaluated the plasma levels of neurofilament light chain  
260 (NfL). NfL is a validated blood-based biomarker of neuronal injury<sup>41</sup> which correlates with  
261 disease progression and tau burden in human tauopathy<sup>42,43</sup>. Female PLX-treated mice had  
262 reduced levels of NfL compared to vehicle-treated mice (Fig. 4a,b), consistent with reduced  
263 CNS injury due to tauopathy. Conversely, NfL levels were increased in male mice following PLX  
264 treatment (Fig. 4c), suggestive of PLX-induced toxicity. Consistent with these findings, PLX  
265 treatment resulted in significantly increased NfL levels in male mice that received midbrain  
266 inoculation of K18 tau fibrils, but not female mice (Fig. 4d-f). We found no correlation between  
267 NfL level and survival in female mice, but in male mice, higher NfL levels were strongly  
268 correlated with reduced survival in both PLX and vehicle treatment groups (Fig. 4g,h).  
269 Furthermore, the concentrations of NfL in both the forebrain and hindbrain at death were  
270 positively correlated with PLX3397 concentration in the brains of male, but not female, Tg2541  
271 mice (Fig. 4i,j). Interestingly, intermittent treatment, resulting in a 50% lower total dosage of  
272 PLX, produced a significant decrease in NfL levels in male mice, but had no effect in female  
273 mice (Fig. 4k-m). Taken together, these data suggest that in female Tg2541 mice, tauopathy  
274 drives CNS injury and its reduction by PLX effectively masks any effect of PLX toxicity, whereas  
275 in male mice, excessive exposure causes CNS injury that supersedes any benefit of PLX.  
276 Consistent with this premise, we found that PLX treatment increased plasma NfL levels in male  
277 wild type mice, as expected, but also in female wild type mice (Fig. 4n-p), albeit at substantially  
278 lower levels than tau-induced NfL in Tg2541 mice.

### 279 **Peripheral CSF1R inhibition does not cause therapeutic or adverse effects in the CNS**

280 CSF1R inhibitors have known adverse effects in the periphery including anemia, leukopenia,  
281 and hepatotoxicity, which have been observed in human clinical trials<sup>44</sup>. To determine if  
282 peripheral PLX toxicity was causing NfL release or reducing drug efficacy, we evaluated mice  
283 receiving chronic treatment with PLX73086, the non-brain penetrant CSF1R inhibitor analog of  
284 PLX3397 and PLX5622. We observed no effect of PLX73086 treatment on body weight or

285 plasma NfL levels in either male or female Tg2541 mice (Fig. 5a–d), indicating that peripheral  
286 CSF1R inhibition does not impact tauopathy-driven phenotypes. Furthermore, we observed no  
287 effect of PLX73086 treatment on body weight or plasma NfL levels in wild type mice (Fig. 5e–h),  
288 demonstrating that the drug-induced toxicity indicated by NfL rise is dependent on the drug  
289 entering the brain. Histopathological evaluation of liver sections of PLX3397-dosed Tg2541  
290 mice stained with hematoxylin and eosin (H&E), Masson’s trichrome, or Picosirius red did not  
291 reveal any overt signs of liver injury or fibrosis (Fig. 5j), nor did quantification of the Picosirius  
292 red-stained liver sections (Fig. 5k). Alkaline phosphatase (ALP) in the plasma, a different  
293 indicator of liver damage, was elevated in Tg2541 mice following PLX3397 treatment; however,  
294 the ALP levels were elevated in both male and female mice (Fig. 5l), indicating that the sex-  
295 specific toxicity of PLX3397 in male mice likely occurs in the brain rather than in the periphery.  
296 Taken together, these data further confirm that the drug exposure of brain-penetrant CSF1R  
297 inhibitors was appropriate for female Tg2541 mice to reduce tauopathy and significantly extend  
298 survival; however, the drug exposure was too high for male Tg2541 mice, and the resulting  
299 neurotoxicity outweighed its therapeutic benefit.

### 300 **CSF1R inhibition shifts gene expression patterns in Tg2541 mice towards wild type**

301 To better characterize global molecular changes in the CNS due to CSF1R inhibition, we used  
302 the Nanostring platform to analyze a curated panel of gene transcripts related to  
303 neuroinflammation, myeloid cell function and neuropathology in bulk brain tissue following  
304 chronic treatment of Tg2541 mice with PLX5622. The chronic treatment group was selected for  
305 this analysis because the collection time point was synchronized (unlike in the terminal  
306 treatment group) and seven months of age is close to the average lifespan of Tg2541 mice. We  
307 measured mRNA transcripts of 1,841 genes, many of them shown to be regulated by tau or A $\beta$   
308 pathology in previous genome-wide gene expression studies<sup>12,13</sup>. To validate the Nanostring  
309 approach, we identified 53 genes with a broad range of expression level changes and measured  
310 mRNA transcripts with quantitative reverse-transcription PCR (RT-qPCR) in the same sample  
311 used for sequencing. The RT-qPCR results generally matched the trends shown in the  
312 Nanostring data (Supplementary Fig. 11), supporting the validity of our transcriptomic data.

313 Since microglial cells are directly impacted by PLX treatment, we first excluded the microglial-  
314 specific genes (see Methods) and examined the general trend of expression patterns among  
315 different treatment groups. Pearson’s correlation matrix showed high similarity among wild type  
316 brains with or without PLX treatment (Fig. 6a), indicating that the gene expression pattern we

317 measured is not affected by the treatment itself. In contrast, PLX treatment in Tg2541 mice  
318 caused a distinct shift in the gene expression pattern away from the vehicle-treated group.  
319 Interestingly, the gene expression patterns of PLX-treated Tg2541 mice showed a stronger  
320 correlation with wild type mice than with vehicle-treated Tg2541 mice (Fig. 6a dashed boxes  
321 and Fig. 6b). To further quantify this shift, we performed partial-least squares (PLS) regression  
322 analysis using the gene expression data from vehicle-treated Tg2541 and wild type mice (Fig.  
323 6c filled circles), and projected the data from PLX-treated mice onto the PLS dimensions (Fig.  
324 6c empty circles). This allowed us to represent the transgene-specific gene expression pattern  
325 in a relatively low-dimensional space, and to quantify the changes associated with treatment by  
326 calculating the population vector distances and angles in this space. We found that PLX  
327 treatment significantly normalized gene expression patterns in Tg2541 mice towards those of  
328 wild type mice (Fig. 6d,e, only two out of five dimensions are shown, covering >95% of the total  
329 variance). The normalization in gene expression was further confirmed by similar trends in  
330 neuron-specific genes (Supplementary Fig. 12). Importantly, PLX treatment in wild type mice  
331 showed negligible changes in the gene expression patterns. These results indicate that PLX  
332 treatment specifically suppresses the abnormal transcriptome associated with transgene  
333 overexpression, consistent with its effects ameliorating pathogenic tau deposition.

#### 334 **Evidence for excitotoxicity with increased drug exposure**

335 As described above, although we observed consistent reduction in the levels of pathogenic tau  
336 in the brains of both male and female Tg2541 mice with PLX treatment, only female mice  
337 benefited from extended survival, functional rescue, and reduced NfL levels (Figs. 1–4). We  
338 hypothesized that excessive PLX dosing may underlie this sex-specific effect, as male mice  
339 consistently had higher drug exposure in the plasma and CNS (Fig. 3 and Supplementary Fig.  
340 9), and also benefitted from a lower, intermittent PLX dosing paradigm (Supplementary Fig. 4).  
341 Indeed, in our transcriptomics analysis we identified individual genes whose expression was  
342 associated with brain PLX5622 concentration or with sex (Fig. 6f). First, we ruled out the  
343 possibility that sex-dependent functional benefits were caused by differential expression of the  
344 drug target, CSF1R, or its ligand, CSF1 (Supplementary Fig. 13). Using a PLS regression of all  
345 non-microglia genes to brain PLX concentration and sex for each sample, we calculated the  
346 variable importance score along each of these dimensions. Interestingly, many immediate early  
347 genes (IEGs) showed high importance scores (Fig. 6g), suggesting that IEGs might be a  
348 module that is altered by CNS drug exposure. To further test this possibility, we examined all  
349 IEGs (56 genes overlapped in our dataset) and found that their expression patterns fit closely

350 with the brain PLX concentration (Fig. 6h). Importantly, when we excluded the IEGs and  
351 examined the PLX-induced transcriptome shift along the wild type-to-Tg2541 dimension, the  
352 correlation of gene expression changes and brain PLX concentration was no longer significant  
353 (Fig. 6i), indicating that the IEGs contribute substantially to the PLX treatment effects. Notably,  
354 relative to wild type vehicle-treated mice, only male PLX5622-treated Tg2541 mice had  
355 significantly upregulated expression of IEGs (Fig. 6j), which we also validated using qPCR of  
356 the five most highly expressed IEGs (Supplementary Fig. 14). Furthermore, we observed the  
357 same drug-dependent IEG up-regulation in male mice in a completely independent study using  
358 PLX3397 (Supplementary Fig. 14), thereby confirming that this is a robust sex-specific effect of  
359 CSF1R inhibition. As increased IEG expression can be indicative of neuronal hyperactivity,  
360 these data provide a plausible mechanism by which excessive PLX dosing may have led to  
361 excitotoxicity, thereby masking its therapeutic effect in male mice.

### 362 **CSF1R inhibition ameliorates pathological activation of astrocytes**

363 As suggested by the reduction of tau deposition, we hypothesized that astrocyte-driven  
364 neuroinflammation would also be reduced by PLX treatment. Therefore, we examined  
365 transcriptome shifts in astrocyte-specific genes upon PLX treatment. Similar to the neuronal-  
366 specific genes, we observed a normalization of astrocyte-specific gene expression patterns  
367 towards wild type in both forebrain and hindbrain regions (Fig. 7a,b). Using previously described  
368 astrocytic gene signatures of disease<sup>45</sup>, we found that PLX treatment led to a dose-dependent  
369 reduction in the expression of the A1 astrocytic gene cluster associated with neurotoxic effects  
370 (Fig. 7c,d). In addition, we measured astrogliosis over time using longitudinal bioluminescence  
371 imaging (BLI) methods based on a previously established transgenic reporter system of glial  
372 fibrillary acidic protein (GFAP)-driven luciferase<sup>46</sup>, which we validated by IHC and mRNA  
373 analyses (Supplementary Fig. 15). To perform reliable BLI in Tg2541 mice, we intercrossed  
374 each transgenic line to an albino background and refined the method, using a synthetic luciferin  
375 substrate to increase signal from deep hindbrain regions (see Methods and Supplementary Fig.  
376 16). This technique allowed us to non-invasively measure astrogliosis in live mice longitudinally  
377 over the course of PLX treatment. In vehicle-treated Tg2541 mice, the BLI signal gradually  
378 increased with age (Supplementary Fig. 17), in accordance with the accumulation of tau  
379 pathology and gliosis reported in Tg2541 mice<sup>23,47</sup>. Consistent with our hypothesis and with  
380 measurement of GFAP using other methods (Supplementary Fig. 15), CSF1R inhibition  
381 suppressed the BLI signal in both the forebrain and the hindbrain (Fig. 7e-g). Together, these  
382 data suggest that astrocytic inflammation, in particular the neurotoxic astrocytes, driven by

383 microgliosis was attenuated by CSF1R inhibition, thus leading to a general neuroprotective  
384 effect.

### 385 **CSF1R inhibition preferentially eliminates a highly activated microglia subpopulation**

386 Given reported roles of microglia in driving astrocytic inflammation and neurotoxicity in disease,  
387 we next interrogated whether resilient microglial phenotypes could be responsible for the sex-  
388 specific neurofunctional effects. Thus, we examined the morphological and transcriptional  
389 changes in microglia following CSF1R inhibition. In tauopathy, microglia acquire an activated  
390 morphology in brain regions where neurons contain tau aggregates, a phenomenon seen in  
391 many focal neuropathologies<sup>48</sup>. Interestingly, the elimination of microglia in the Tg2541 mouse  
392 brain following PLX3397 treatment was not uniform nor complete, but was the most effective in  
393 the vicinity of tau aggregates (Fig. 8a,b). The microglial density near tau-laden neurons was  
394 reduced by more than 60%, but in distal regions (>200 microns) the microglial density was not  
395 significantly changed (Fig. 8c), indicating that microglia in the vicinity of the tau aggregates may  
396 have increased sensitivity towards CSF1R inhibition. We then compared the morphologies of  
397 PLX-resistant (residual microglia in PLX-treated mice) and PLX-sensitive microglia (in vehicle-  
398 treated mice). Notably, we found that PLX resistance was associated with more abundant and  
399 intricate microglial cell processes, close to the levels seen in wild type mice (Fig. 8d–g). The  
400 number of microglial process branches ( $P = 0.0075$ ), process lengths ( $P = 0.028$ ), and territory  
401 sizes ( $P = 0.011$ ) in the forebrain were also significantly different between male and female  
402 PLX-treated mice, with female mice showing more abundant and intricate microglial processes  
403 by all three metrics (Fig. 8d–g). These data suggest that microglia associated with tau pathology  
404 may be in an “activated” state, with a reduced number of processes. This view is consistent with  
405 previous reports that activated microglia adopt a “disease-associated microglial” (DAM)  
406 phenotype, with some of the signature genes associated with inflammatory responses that are  
407 detrimental to adjacent neural cells<sup>49,50</sup>. Interestingly, our data suggests that DAM in tauopathy  
408 are more vulnerable to PLX treatment, and that surviving microglia might be neuroprotective,  
409 particularly in female mice.

410 In support of this view, transcriptome analyses showed that many microglial-specific genes were  
411 upregulated in Tg2541 mice (Fig. 9a), among which the most notable were signature DAM  
412 genes such as *Tyrobp*, *Clec7a*, *Trem2* and *CD68*. By correlation analysis among different  
413 samples using a generalized Louvain algorithm<sup>51</sup>, we found that the microglia-specific genes in  
414 our dataset were clustered into three groups (Fig. 9b and Supplementary Fig. 18). The red-

415 cluster genes showed the highest degree of modulation by transgene overexpression, while the  
416 blue-cluster genes showed a moderate degree of modulation, and the green-cluster genes  
417 showed almost no difference between Tg2541 and wild type mice (Fig. 9c). Transgene-  
418 modulated genes clustered into red and blue groups, consistent with a recent finding that tau  
419 pathology activates both immune-activation and immune-suppression gene expression  
420 modules<sup>10</sup>.

421 We next compared the gene expression patterns in vehicle- and PLX5622-treated brains. We  
422 examined all previously reported DAM signature genes<sup>50</sup> and found a partial match with the  
423 activation markers in each of our identified gene clusters (Fig. 9d). Regardless of the  
424 designation of homeostatic or activation genes reported in previous studies, the red-cluster  
425 genes showed a stereotypical pattern of transgene activation and sensitivity to PLX treatment,  
426 while green- and blue-cluster genes did not appear to be modulated by these factors. Given that  
427 PLX predominantly eliminated microglia in the vicinity of the tau deposits (Fig. 8c), these data  
428 suggest that red-cluster genes are preferentially expressed by tau-associated microglia.  
429 Interestingly, when we examined PLX-induced expression changes in male and female mice  
430 separately, we found that while the expression of red cluster genes were substantially  
431 diminished by PLX independent of sex, green cluster genes were markedly increased in treated  
432 male mice (Fig. 9c). The increase in green cluster gene expression is remarkable considering  
433 the >50% reduction in microglial cell number. To account for microglial cell reduction, we  
434 calculated the gene expression of resilient microglia by normalization to six microglia-specific  
435 housekeeping genes. The normalized data showed a trend towards increased gene expression  
436 in male mice, yet most of the male-specific PLX-induced genes belonged to the green cluster  
437 (Fig. 9f), many of which are known to be pro-inflammatory. Indeed, subsequent Ingenuity  
438 Pathway Analysis revealed a higher activation of inflammation-related pathways in PLX-treated  
439 male mice compared to female mice (Fig. 9g). These inflammation-related pathways included  
440 tau-activated NF- $\kappa$ B<sup>52</sup> and excitotoxicity<sup>53</sup> pathways, but not amyloid-induced inflammasome  
441 genes<sup>54</sup> (Supplementary Fig. 19). Pathways related to phagocytosis or microglia growth, on the  
442 other hand, did not show such consistent sex-specific change (Fig. 9g). Taken together, our  
443 data show morphological and transcriptional changes in microglia associated with tau  
444 deposition, consistent with a pattern of pathological activation. CSF1R inhibition appears to  
445 preferentially eliminate these microglia in female mice, leaving the brain with a more quiescent  
446 and less inflammatory microglial population. Male mice, on the other hand, showed a drug-  
447 induced inflammatory microglia phenotype, which might contribute to neuronal excitotoxicity and

448 diminished therapeutic effect.

449

## 450 **DISCUSSION**

451 Our study reveals several major findings from a comprehensive evaluation of CSF1R inhibitors  
452 in preclinical models of tauopathy. Importantly, we present the first line of evidence that CSF1R  
453 inhibition reduces pathology that leads to functional improvements associated with longer  
454 lifespan and reduced behavioral deficits in tauopathy mice (Figs. 2 and 3). Overall, our data  
455 showing a reduction of pathogenic tau is consistent with prior studies using a different drug  
456 scaffold targeting CSF1R (JNJ-527; edicotinib) in Tg2541 mice<sup>18</sup>, or using PLX3397 in a  
457 different mouse model of tauopathy (TgPS19)<sup>17</sup>. However, in our study, neuroprotection  
458 occurred despite incomplete microglia depletion (~60%); upon deeper analysis, we identified  
459 distinct microglial-specific gene clusters suggesting subsets of microglia responsive to  
460 tauopathy or resilient to CSF1R inhibition (Fig. 9). This finding is in line with the wealth of data  
461 demonstrating that microglia exist as unique subsets in different brain regions, sexes, ages or  
462 disease states<sup>2-4</sup>. From this perspective, our data suggest that it may be possible to target  
463 specific subsets of activated microglia in tauopathy, without affecting other beneficial microglia  
464 populations. Taken together, we argue that CSF1R inhibition causing complete microglia  
465 ablation is unnecessary for therapeutic benefits, and may possibly be detrimental in humans  
466 given that microglia are important for brain homeostasis and defending against other insults.  
467 Several prior studies have suggested that therapeutic outcomes may only be achieved with  
468 complete ablation of microglia, although these studies used different mouse models or dosing  
469 regimens<sup>17,19</sup>. Nevertheless, these disparate findings in prior literature are now more  
470 interpretable alongside our study, which sheds light on the intricate relationships between  
471 CSF1R inhibitor dosing, microglial depletion and therapeutic outcomes.

472 The precise mechanism of CSF1R inhibitors causing reduced tau pathology is still unclear, but  
473 our data indicates that activated microglia are the primary target resulting in reduced numbers of  
474 cells producing pro-inflammatory cytokines<sup>7-9</sup> and other disease-associated microglial factors  
475 (Fig. 9) that stoke tau pathogenesis in neurons, such as apolipoprotein E<sup>17,55</sup> and complement  
476 proteins<sup>56</sup>. In addition, it seems plausible that CSF1R inhibitors may also block microglia-  
477 mediated activation of A1 astrocytes<sup>45</sup>, which in turn secrete factors that also drive tau  
478 pathogenesis; blocking this cellular feed-forward pathway using a different drug targeting  
479 microglia led to neuroprotection in a synucleinopathy model of Parkinson's disease<sup>57</sup>.

480 Consistent with this view, PLX-treated mice exhibited a restored astrocyte phenotype,  
481 suggesting that therapeutic benefits in our study may also be due, in part, to quelling neurotoxic  
482 A1 astrocytes (Fig. 7). Pharmacological CSF1R inhibition has been reported to also deplete  
483 PVMs<sup>58</sup>. Although we did not detect a significant reduction in the numbers of cortical blood  
484 vessel-associated PVMs in our studies (Supplementary Fig. 7), their roles in tauopathy remain  
485 to be determined. While there is cross-talk between peripheral immune cells and microglia<sup>1</sup>, we  
486 show that a non-brain penetrant analog, PLX73086, did not affect CNS microglia, tau pathology  
487 or NfL levels (Fig. 5 and Supplementary Fig. 6), and it is thus unlikely that CSF1R inhibition in  
488 the periphery contributes to the phenotypic rescue observed in our study. Lastly, it is possible  
489 that chronic PLX treatment caused depletion of some oligodendrocyte progenitor cells (OPCs)  
490 in our study, but we expect that PLX did not affect mature oligodendrocytes or myelination<sup>59</sup>.  
491 The relationship between OPC biology and tau pathology in neurons is largely unknown, and  
492 thus it remains unclear how CSF1R inhibition in OPCs contributes, if at all, to the mechanism of  
493 action. Nevertheless, this topic warrants further investigation.

494 Tau pathology in Tg2541 mice is associated with moderate microgliosis and an up-regulation of  
495 transcriptomic signatures of microglial activation<sup>10,49</sup>. Our transcriptome analysis showed  
496 activation of two major clusters of microglial-specific genes in Tg2541 mice. These two clusters  
497 had a high degree of overlap with the immune activation and suppression modules recently  
498 described in tauopathy mice and FTL D patients<sup>10</sup>, indicating a specific reactive transcriptional  
499 program of microglia towards tau pathology. Consistent with this view, genes in the activated  
500 clusters also matched transcriptome modules described in activated microglia in  
501 neurodegeneration models (such as *Itgax* and *Clec7a*), but not in tumor or acute inflammation  
502 models<sup>49</sup>. We found an additional cluster of microglial genes that had similar expression in  
503 Tg2541 and wild type mice. Intriguingly, this cluster was not affected by PLX treatment in female  
504 mice, while in male mice this cluster exhibited marked activation (Fig. 9). Considering that PLX  
505 eliminates more than half of the total microglia population, a parsimonious explanation for this  
506 sustained gene cluster is that they are preferentially expressed by an inert microglial  
507 subpopulation that does not respond to tauopathy or lower dose CSF1R inhibition<sup>60</sup>. Consistent  
508 with this notion, we found that PLX treatment preferentially eliminates activated microglia in the  
509 vicinity of tau deposits, and thus most surviving microglia are not in direct contact with tau-laden  
510 neurons (Fig. 8). This is in contrast to A $\beta$  mice, in which the surviving microglia are usually  
511 associated with A $\beta$  plaques following PLX treatment<sup>22,61</sup>. We found that surviving microglia in  
512 female mice were non-inflammatory, and had longer and more elaborate processes compared



513 to vehicle-treated microglia, showing functional and morphological features more similar to  
514 those of wild type microglia (Fig. 8). In sum, our data describe a microglial genetic signature that  
515 remains stable in Tg2541 mice with or without PLX treatment, likely representing a “dormant”  
516 microglial subpopulation that are less dependent on CSF1R for survival, or are less sensitive to  
517 CSF1R inhibition at the doses administered in our study.

518 Sex-specific differences exist in mouse microglial function, gene expression, and response to  
519 tauopathy, and the differences increase with age<sup>62-64</sup>. Our data identify a sex-dependent effect  
520 on therapeutic exposure and efficacy of CSF1R inhibition in Tg2541 mice. A difference in the  
521 plasma levels of PLX3397 during *ad libitum* oral dosing in male and female mice has been  
522 noted previously<sup>17</sup>; however, only male mice were evaluated further. We examined both male  
523 and female Tg2541 mice and found that, despite similar food intake, plasma and brain levels of  
524 PLX3397 were higher in male mice compared to female mice (Fig. 3 and Supplementary Fig. 9).  
525 However, at this level of drug exposure, only female mice received a functional benefit from  
526 CSF1R inhibition, an unexpected and clinically relevant outcome that would have been  
527 overlooked had our analysis been focused on a single sex. In male Tg2541 mice, despite a  
528 robust reduction of microglia and pathogenic tau, PLX treatment did not slow weight loss or  
529 extend survival, and plasma NFL levels were significantly increased, indicative of neuronal  
530 damage<sup>41</sup>. Neurodegeneration in Tg2541 mice has been shown to be largely limited to spinal  
531 cord motor neurons<sup>23,65</sup>, and we found that NeuN and total tau immunoreactivity in the brain  
532 were largely unchanged by CSF1R inhibition (Supplementary Fig. 8). Thus, the functional  
533 deficits we measured are likely caused by neuronal dysfunction rather than neuronal death, but  
534 can be rescued by CSF1R inhibition. It has been suggested before that microglia from male  
535 animals may exhibit an increased responsiveness to CSF1R depletion compared to microglia  
536 from female animals<sup>66</sup>. Our results indicate that despite robust on-target effects for microglial  
537 depletion, male mice developed a PLX-induced inflammatory microglial phenotype.  
538 Furthermore, we observed a concentration-dependent activation of IEGs in PLX treated Tg2541  
539 mice, suggesting that excessive PLX dosing in male mice may lead to excitotoxicity (Fig. 6),  
540 thus masking the beneficial effect of tau reduction. Microglia in male mice adopted a  
541 transcriptome and morphological phenotype that have been previously linked to  
542 excitotoxicity<sup>53,67</sup>. Curiously, IEGs were not significantly upregulated in male wild type mice,  
543 indicating that their activation may not be due to high concentration of PLX alone, but may also  
544 be dependent on tau deposits. Previous studies have linked tau accumulation and aberrant  
545 neural activity *in vivo*<sup>68</sup>. On the other hand, microglia are known to mediate neuroprotection

546 against excitotoxicity<sup>67,69</sup> and elimination of microglia can exacerbate seizures and related  
547 neuronal degeneration<sup>70</sup>. Therefore, the concurrent tau removal and drug-induced inflammation  
548 driven by surviving microglia may increase the risk for hyperactivity, resulting in excitotoxicity in  
549 male mice with high PLX concentrations. Other sex-specific differences may also contribute to  
550 microglial sensitivity to CSF1R inhibition by a currently unknown mechanism. Future  
551 translational studies of pharmacological CSF1R inhibitors will need to carefully evaluate the role  
552 of sex in both safety and therapeutic outcomes.

553 CSF1R inhibitors were shown to be protective in mouse models of other neurodegenerative  
554 diseases, such as AD and Down syndrome<sup>22,71,72</sup>. However, under different treatment  
555 conditions, CSF1R inhibition did not affect A $\beta$  plaque burden, but did rescue some functional  
556 deficits<sup>61,73</sup>. Therefore, microglia play a dynamic role in the brain's response to A $\beta$  pathogenesis,  
557 and their attenuation may impart distinct benefits at different stages of disease. Our results  
558 suggest that, in primary human tauopathies, a subset of microglia play a net negative role  
559 before, during, and after disease onset and that their removal may be a viable therapeutic  
560 strategy. It remains to be determined if similar benefits should be expected for tauopathy in AD  
561 given the preceding comorbid A $\beta$  pathology, but this may be elucidated in rodent models co-  
562 expressing human tau and A $\beta$ . Nevertheless, because CSF1R inhibition has not been reported  
563 to be detrimental in A $\beta$  mice, CSF1R inhibitors could ameliorate AD-related tauopathy even if  
564 caused by different disease mechanisms. Ongoing human clinical trials of CSF1R inhibitors in  
565 AD (e.g. NCT04121208) may provide additional mechanistic insights.

566 Primary human tauopathies constitute a class of neurodegenerative diseases caused by tau  
567 misfolding and aggregation and include progressive supranuclear palsy (PSP), corticobasal  
568 degeneration (CBD) and Pick's disease, among others. When combined with AD, in which tau  
569 aggregation follows A $\beta$  deposition, tauopathies afflict a significant proportion of the human  
570 population, and thus novel approaches to directly or indirectly block tau pathogenesis or its  
571 downstream effects are urgently needed. Our study highlights several aspects of  
572 pharmacological CSF1R inhibition that bolster its therapeutic potential for human tauopathies.  
573 First, we observed greater efficacy of early (acute) CSF1R inhibition to restrict tau-prion levels in  
574 forebrain regions (Fig. 1e), likely due to reduced disease severity there relative to hindbrain  
575 regions. At later stages (chronic and terminal), CSF1R inhibition with PLX3397 did reduce tau-  
576 prion levels in the hindbrain, albeit a modest reduction relative to the effects in the forebrain  
577 (Fig. 1f,g). These findings suggest that early and long-term CSF1R inhibition (though not  
578 necessarily continuous) would most effectively mitigate human tauopathy. Second, we

579 demonstrated that interventional dosing of Tg2541 mice, initiated at a stage when robust tau  
580 deposition had already occurred<sup>23,27</sup>, led to a significant reduction in pathogenic tau  
581 (Supplementary Fig. 4). Therefore, our data support some potential clinical benefit of CSF1R  
582 inhibitors for treatment, in addition to prevention, of tauopathy. This is important because  
583 prophylactic prevention of non-autosomal dominant neurodegenerative diseases may be difficult  
584 due to a lack of definitive prognostic biomarkers paired with the fact that aggregation of the  
585 causative proteins can occur years or decades prior to symptom onset<sup>30</sup>. Third, we found that  
586 intermittent dosing of Tg2541 mice at three-week intervals produced a significant reduction in  
587 pathogenic tau (Supplementary Fig. 4). Despite relatively minimal off-target effects from  
588 continuous, long-term dosing of CSF1R inhibitors in mice<sup>22</sup>, non-human primates<sup>74</sup>, and  
589 humans<sup>21</sup>, intermittent dosing would be clinically preferable if a similar therapeutic outcome was  
590 achieved, given the important functions for microglia and related peripheral cells in innate  
591 immunity. Because neurodegenerative tauopathies are slow, protracted diseases and microglia  
592 are long-lived<sup>75</sup>, it is conceivable that breaks in dosing may occur on the order of months or  
593 years and be informed by medical imaging probes for microglia activation<sup>76</sup>. Imaging will be  
594 highly valuable for guiding intermittent dosing because microglial repopulation in a pathological  
595 setting (e.g., disease or normal aging) may not necessarily result in a return to baseline  
596 transcriptional profiles. Fourth, we found CSF1R inhibition to extend the survival of female  
597 Tg2541 mice (Fig. 2), indicating that the reduction in pathogenic tau in this model system  
598 translates to an improved clinically relevant outcome. We postulate that if CSF1R inhibitor  
599 dosing was optimized for male Tg2541 mice, any adverse effects in the CNS or periphery would  
600 likely be diminished and their survival extended. Fifth, we showed that complete microglial  
601 depletion is not necessary, or even desirable, for a therapeutic benefit. As discussed above, the  
602 microglia that survive CSF1R inhibition represent a unique microglial sub-population that likely  
603 serves important functions in brain homeostasis. Future preclinical studies may pinpoint the  
604 precise level, timing, and frequency of CSF1R inhibition such that the detrimental effects of  
605 microglial activation are minimized while an appropriate number of homeostatic microglia  
606 remain for brain surveillance. Lastly, CSF1R inhibitors applied in conjunction with tau  
607 immunotherapy may prove to be a successful combination therapy; because microglia are not  
608 needed for antibody effector function<sup>77</sup>, removing tauopathy-activated microglia would slow tau  
609 pathogenesis and may also increase the efficacy of tau immunotherapy. Taken together, our  
610 data strongly support the therapeutic modulation of microglial activation by CSF1R inhibitors as  
611 a promising approach to treating human tauopathies.

612

## 613 **METHODS**

### 614 **Animals**

615 The Tg2541 transgenic mouse line expresses the human 0N4R tau isoform under the Thy1.2  
616 genetic promoter. Tg2541 mice were originally generated on a mixed C57BL/6J × CBA/Ca  
617 background<sup>23</sup> and were then bred onto a congenic C57BL/6J background using marker-assisted  
618 backcrossing for eight generations before intercrossing to generate homozygous mice. Albino  
619 Tg2541 mice were generated by intercrossing Tg2541 with C57BL/6J mice expressing a  
620 spontaneous mutation in the tyrosinase gene (homozygous for *Tyr<sup>c-2J</sup>*) causing albinism  
621 (Jackson Laboratory; 000058). To generate mice for *in vivo* bioluminescence imaging, we  
622 employed Tg(*Gfap-luc*) mice, which express firefly luciferase under the control of the murine  
623 *Gfap* promoter (gift from Caliper Life Sciences). These reporter mice were originally on the FVB  
624 background, but we backcrossed them to a congenic B6 background, and then crossed them to  
625 the B6-albino background. To create bigenic mice, albino Tg2541 mice were crossed with albino  
626 Tg(*Gfap-luc*) animals to produce double hemizygotes; next, double hemizygotes were crossed  
627 and the progeny were screened for the presence of both transgenes expressed at  
628 homozygosity. Animals were maintained in a facility accredited by the Association for  
629 Assessment and Accreditation of Laboratory Animal Care International in accordance with the  
630 *Guide for the Care and Use of Laboratory Animals*. All procedures for animal use were  
631 approved by the University of California, San Francisco's Institutional Animal Care and Use  
632 Committee.

### 633 **PLX compound formulation in mouse chow**

634 PLX3397 was provided by Plexxikon Inc. and was formulated in AIN-76A standard chow by  
635 Research Diets Inc. at 275 mg/kg as previously described<sup>78</sup>. PLX5622 was provided by  
636 Plexxikon Inc. and was formulated in AIN-76A standard chow by Research Diets Inc. at 1200  
637 mg/kg as previously described<sup>61</sup>. PLX73086 was provided by Plexxikon Inc. and was formulated  
638 in AIN-76A standard chow by Research Diets Inc. at 200 mg/kg as recommended by Plexxikon  
639 Inc.

### 640 **Immunohistochemistry and slide scanning**

641 Formalin-fixed samples were embedded into paraffin (FFPE) using standard procedures and

642 microtome-cut into 8  $\mu\text{m}$  sagittal brain sections or coronal spinal cord sections and mounted  
643 onto slides. To reduce tissue autofluorescence, paraffin slides were photobleached for 48 hours.  
644 Slides were deparaffinized in a 61°C oven for 15 minutes and rehydrated through alcohols.  
645 Antigen retrieval was performed by autoclaving for 10 minutes at 121°C in 0.01 M citrate buffer.  
646 Sections were blocked in 10% normal goat serum (NGS) (Vector Labs) for 1 hour at room  
647 temperature. All primary antibodies were used at 1:250 dilution and included rabbit monoclonal  
648 anti-Iba1 (Abcam, ab178847), rabbit polyclonal anti-P2YR12 (Atlas, HPA014518), mouse  
649 monoclonal anti-NeuN (Millipore, MAB377), chicken anti-GFAP (Abcam, ab4674), and mouse  
650 monoclonal anti-pS202/T205 tau (AT8; Thermo Fisher, MN1020). Primary antibodies were  
651 diluted in 10% NGS in PBS and allowed to incubate on the slides overnight at room  
652 temperature. Primary antibody detection was performed using goat secondary antibodies with  
653 conjugated AlexaFluor 488, AlexaFluor 555, or AlexaFluor 647 (Life Technologies) at 1:500  
654 dilution. Slides were cover-slipped using PermaFluor mounting medium (Thermo). Whole-  
655 section tiled images were acquired with an Axioscan.Z1 slide scanner (Zeiss) at 20 $\times$   
656 magnification, and quantification was performed with Zen 2.3 software (Zeiss).

#### 657 **Cellular bioassay to measure tau-prion activity**

658 A HEK293T cell line expressing the repeat domain of 4R human tau (aa 243–375) containing  
659 the P301L and V337M mutations and C-terminally fused to YFP was previously generated as  
660 described<sup>29</sup>. A stable monoclonal line was maintained in DMEM, supplemented with 10% FBS  
661 and 1% penicillin/streptomycin. To perform the bioassay, 3,000 cells (containing 0.1  $\mu\text{g}/\text{ml}$   
662 Hoechst 33342) were plated in 70  $\mu\text{l}$  per well into 384-well plates (Greiner) and incubated for 2  
663 hours before treatment with samples. Clarified brain lysate at a final concentration of 1.25  $\mu\text{g}/\text{mL}$   
664 total protein was first incubated with Lipofectamine 2000 (0.2% final concentration) and  
665 OptiMEM (9.8% final concentration) for 90 minutes, and then added to the plated cells in  
666 quadruplicate. Plates were incubated at 37°C for 1–3 days, and then the live cells were imaged  
667 using an INCell Analyzer 6000 Cell Imaging System (GE Healthcare) and custom algorithms  
668 were used to detect fluorescent YFP-positive puncta (aggregates).

#### 669 **Mechanical tissue homogenization**

670 Postmortem brains and spinal cords were thawed and weighed to determine the mass in grams.  
671 Brains were bisected into forebrain and hindbrain pieces using a single cut with a scalpel blade  
672 between the striatum and hypothalamus. Tissue was homogenized in nine volumes of cold  
673 DPBS containing Halt Protease Inhibitor Cocktail (1x, Thermo Fisher Scientific) using a

674 Precellys 24-bead beater (Bertin Instruments) with metal bead lysing matrix (MP Biomedical).  
675 Where necessary, brain lysates were clarified by centrifugation at 10,000 × g for 10 min at 4°C.  
676 All tissue and samples were stored at –80°C until further use.

#### 677 **Formic acid extraction of insoluble proteins in brain tissue for ELISA**

678 Fifty microliters of formic acid were added to 25 µL of 10% brain homogenate and placed in an  
679 ultracentrifuge tube. The samples were vortexed, sonicated for 20 minutes at 37°C in a water-  
680 bath sonicator, and then centrifuged at 100,000 x g for 1 hour. Fifty microliters of supernatant  
681 were recovered to a low-binding tube and neutralized with 950 µL of neutralization buffer (1 M  
682 Tris base and 500 mM dibasic sodium phosphate). Samples were aliquoted into low-binding  
683 tubes and flash frozen in liquid nitrogen. The following ELISA kits from Thermo Fisher Scientific  
684 were used according to the manufacturer's protocols: total tau (KHB0041), p-tau S396  
685 (KHB7031), and p-tau T231 (KHB8051). Each sample was analyzed in duplicate. Raw ELISA  
686 values were adjusted to total brain protein (grams) in the clarified 10% brain homogenate as  
687 determined by bicinchoninic acid (BCA) assay (Pierce/Thermo Fisher Scientific).

#### 688 **Quantification of total protein in brain homogenate**

689 Total protein content in the PBS-soluble (clarified 10% brain homogenate) and detergent-  
690 soluble fractions was quantified using the Pierce BCA Protein Assay Kit (Thermo Fisher  
691 Scientific) following the manufacturer's protocol.

#### 692 **Generation of tau K18\*P301L fibrils**

693 Production, purification and fibrillization of recombinant tau K18\*P301L fibrils were performed as  
694 previously described<sup>79</sup>.

#### 695 **Stereotaxic injections in Tg2541 mice**

696 Forebrain inoculation: Ten-week-old Tg2541 mice received unilateral inoculations of 10 µl of 1.5  
697 mg/ml tau K18 P301L fibrils using stereotaxic methods. Injections followed a two-step process:  
698 the needle was first advanced to the hippocampus (Bregma -2.5mm, Lateral 2.0mm; Depth -2.3  
699 mm from the skull surface) to deliver 5 µl over three minutes, then the Hamilton syringe pump  
700 was paused for five minutes to allow for diffusion prior to retracting the needle to the overlying  
701 cortex (Depth -1.3 mm) where the remaining 5 µl was injected. After fibril injection, the needle  
702 remained in place for five minutes to allow for diffusion of fibrils before retraction, patching the  
703 skull and suturing the scalp. Midbrain inoculation: Ten-week old Tg2541 mice received bi-lateral

704 inoculations of 10  $\mu$ l of 1.5 mg/ml tau K18 P301L fibrils using stereotaxic methods. Five  
705 microliters was injected at each site in the midbrain (Bregma, -4.3 mm; Lateral, 1.0 mm, Depth, -  
706 2.5 mm) and (Bregma, -4.3 mm; Lateral, -1.0 mm, Depth, -2.5 mm).

### 707 **Automated home cage monitoring of behavior**

708 Total activity measurements of freely moving mice were made every 30 days after PLX dosing  
709 in Promethion cages (Sable Systems International). At each time point, mice were first  
710 randomized and placed individually in Promethion cages for 4 to 6 days. Real-time cage activity  
711 recording was continuous during the entire session using a combination of a running wheel with  
712 sensors to measure speed and distance traveled, three balances to measure body weight, food  
713 and water consumption, and a matrix of infrared light beams to measure XYZ movements with  
714 0.25 cm resolution. Analysis of these metrics was used to detect behaviors such as sleep,  
715 rearing and general locomotion. For each mouse, data used for analyses were average  
716 readings per light or dark cycle. Data from the first circadian cycle were excluded due to variable  
717 behavior during habituation. To calculate the activity scores, wheel use, locomotion and rearing  
718 were first normalized to a 0–1 scale by the maximum value in the whole dataset, and then the  
719 geometric mean of the normalized values for each session was calculated.

### 720 **Quantification of PLX compound levels in brain tissue and plasma**

721 Brain homogenates (20% w/v) were prepared in PBS by one 30-second cycle of bead beating at  
722 5500 rpm with a Precellys 24-bead beater (Bertin Instruments) or plasma samples were  
723 prepared by dilution to 25% with PBS. Compounds were recovered by mixing equal parts of  
724 brain homogenate with a 50/50 (v/v) solution of acetonitrile (ACN) and methanol containing 1  
725 mM niflumic acid. Precipitated proteins were removed by vacuum filtration (Captiva ND,  
726 Agilent). Analysis was performed using a liquid chromatography-tandem mass spectrometry  
727 system consisting of an API4500 triple quadrupole instrument (AB Sciex, Foster City, CA)  
728 interfaced with a CBM-20A controller, LC20AD 230 pumps, and a SIL-5000 auto-sampler  
729 (Shimadzu Scientific, Columbia, MD). Samples were injected onto a BDS Hypersil C8 column  
730 maintained at room temperature. The amount of ACN in the gradient was increased from 75–  
731 95% ACN over two minutes, held for one minute, and then re-equilibrated to 75% ACN over 1.4  
732 minutes. Data acquisition used multiple reaction monitoring in the positive ion mode. Specific  
733 methods were developed for each compound (PLX3397 and PLX5622), enabling the  
734 determination of absolute concentrations.

735 **Blood plasma neurofilament light (NfL) protein measurement using SIMOA**

736 At monthly time points, 150  $\mu$ l blood was collected in EDTA-coated tubes. The plasma was  
737 centrifuged at 1,000 x g for ten minutes to clarify the samples, and was then diluted with sample  
738 diluent buffer included in the kit by 25-fold and 100-fold, respectively, prior to the measurement.  
739 Plasma NfL concentration was measured and analyzed using the NfL kit (Quanterix) with the  
740 SIMOA HD-1 analyzer (Quanterix). Briefly, samples, magnetic beads coated with capture  
741 antibody, and biotinylated detector antibodies were combined. Thereafter, the capture beads  
742 were resuspended with streptavidin- $\beta$ -galactosidase (SBG) and resorufin  $\beta$ -D-  
743 galactopyranoside (RGP) and transferred to the SIMOA disk. Each bead fit into a microwell in  
744 the disk and if NfL was captured then the SBG hydrolysed the RGP substrate which generated  
745 a fluorescent signal, and then the concentration was measured against a standard curve  
746 derived from known concentrations of recombinant NfL included in the kit. The lower limit of  
747 quantification of the assay for plasma was 17.15 pg/mL.

748 **Masson's trichrome and Picosirius red staining**

749 FFPE liver sections (eight  $\mu$ m) were deparaffinized through xylenes and graded alcohols and  
750 then rehydrated in distilled water. The Masson's trichrome staining kit (Abcam #ab150686) was  
751 used according to the manufacturer's protocol. The Picro Sirius Red Stain Kit (Abcam  
752 #ab150681) was used to stain tissue sections for 60 min at room temperature. The slides were  
753 rinsed in two changes of acetic acid, three changes of ethanol, and then mounted using  
754 PermaFluor mounting medium (Thermo). Whole-section tiled images were acquired with an  
755 Axioscan.Z1 slide scanner (Zeiss) at 20 $\times$  magnification, and quantification was performed with  
756 Zen 2.3 software (Zeiss).

757 **Alkaline phosphatase (ALP) ELISA of plasma samples**

758 Mouse plasma samples were diluted 1:100 in the provided dilution buffer and measured using  
759 the ALP ELISA kit (Biovision #E4572-100) according to the manufacturer's protocol.

760

761 **RNA extraction and Nanostring RNA expression measurements**

762 RNAlater-preserved samples were homogenized in PBS and total RNA was extracted from  
763 samples using the Quick-RNA Miniprep Kit (Zymo Research). RNA extracts were evaluated for  
764 concentration and purity using a Nanodrop 8000 instrument (Thermo Fisher Scientific) and  
765 diluted to a concentration of 20 ng/ $\mu$ l. Hybridizations were performed for the mouse



766 Neuroinflammation, Myeloid cell, and Neuropathology panels according to the nCounter XT  
767 Assay user manual (Nanostring). The hybridizations were incubated at 65°C for 16 hours, and  
768 then were added to the nCounter SPRINT Cartridge for data collection using the nCounter  
769 SPRINT Profiler. Counts were analyzed using the nSolver Analysis Software.

## 770 **RNA expression analysis**

771 In total, there were 10 mice in the Tg2541 vehicle group, 10 mice in the Tg2541 PLX5622  
772 group, 6 mice in the wild type vehicle group, and 6 mice in the wild type PLX5622 group. Each  
773 mouse had separate forebrain and hindbrain samples and three panels of Nanostring  
774 sequencing were performed on each sample. Data from the three panels were pooled together  
775 to form the final dataset. When pooling data, if a gene appeared in more than one panel then  
776 the average read value was used in subsequent analysis, unless one panel failed to detect the  
777 gene.

778 To assign cell-type specificity of each gene, we used the transcriptome dataset reported in a  
779 previous study<sup>80</sup>, inspired by previously reported approaches in bulk tissue samples<sup>49</sup>. We set a  
780 specificity threshold in which a gene qualifies to be cell-type specific if its expression in a cell  
781 type is greater than five times the sum in all other cell types. Using this standard, our dataset  
782 had 242 microglia-specific genes, 47 astrocyte-specific genes and 70 neuron-specific genes. All  
783 cell-type specific gene analyses were repeated with a three-time threshold and all results were  
784 consistent (data not shown).

785 We used partial least-square (PLS) regression (MATLAB) to extract the gene expression pattern  
786 aligned with Tg2541-wild type axis, using individual gene reads from each mouse as predictors  
787 and genotype as responses. Only vehicle groups were used in constructing the PLS regression.  
788 Forebrain and hindbrain were calculated separately. Five output dimensions were chosen for all  
789 PLS analyses, as they covered 99.99% of the total variance in all cases. The scores in the first  
790 two dimensions were plotted. To project PLX3397-treated groups to the PLS dimensions, we  
791 used the following formula:

$$792 \text{Score}_{projection} = (\text{Loading}_{predictor} \setminus (\text{raw} - \text{mean}_{predictor}))'$$

793 To calculate population vector distance, we use the “mhal” command in MATLAB. All five  
794 dimensions were used for each mouse. The wild type vehicle group was used as a target.

795 To calculate the vector angle, each mouse’s gene expression pattern was regarded as a five-

796 dimension vector in the PLS space, and the angle between each mouse and the average vector  
797 of the wild type vehicle group was calculated with the following formula:

$$798 \quad A = \cos^{-1}((u \cdot v)/(|u||v|))$$

799 To calculate the PLS regression along the PLX concentration and sex-correlated dimensions,  
800 we constructed regressions using all non-microglial genes or only immediate early genes<sup>81</sup> to  
801 measured brain PLX concentrations and sex of each sample. We then calculated variable  
802 importance in projection to isolate the genes important for the regression. To calculate the  
803 projected PLX concentrations, we used the products of gene expression levels and coefficients  
804 estimated from PLS regression.

805 To calculate clusters in the microglial-specific genes, we calculated pairwise Pearson's  
806 correlation coefficients across 32 samples among each gene. The resulting similarity matrix was  
807 then processed with a generalized Louvain community detection algorithm<sup>51</sup>.

808 To estimate the gene expression levels of the resilient microglia, we used 6 genes (Tmem119,  
809 P2ry12, Fcrls, Olfm13, Itgam v1, and Itgam v2) as microglial-specific house-keeping genes<sup>82</sup> and  
810 used their levels relative to the vehicle-treated group to scale the expression levels of other  
811 microglial genes. We used these estimated expression levels as input for the Ingenuity Pathway  
812 Analysis (QIAGEN).

### 813 **Gene expression analysis by RT-qPCR**

814 Mouse brains were collected at endpoints and flash frozen in DNA/RNA shield reagent. Tissue  
815 was homogenized as described above and total RNA was purified using a commercial isolation  
816 kit (Zymo Research). RNA concentration and the RNA integrity number (RIN) were determined  
817 using a Bioanalyzer 2100 instrument and an Agilent RNA 6000 Pico Kit (Agilent 5067-1513).

818 Only samples with a RIN score  $\geq 7.0$  were used for gene expression analysis. To confirm  
819 transcriptome profiling results, 2.5 ng of sample mRNA was applied to triplicate RT-qPCR  
820 reactions consisting of 1x TaqPath 1-Step Multiplex Master Mix (ThermoFisher Scientific  
821 A28526), Taqman primer/probe sets and a normalizing human MAPT Taqman assay. Reactions  
822 were run on a QuantStudio 6 and 7 Pro instrument and amplification yielding cycle threshold  
823 ( $C_T$ ) values were corrected with Mustang Purple passive reference dye for each target gene.  
824 Gene expression of PLX-treated mice relative to vehicle-treated mice was determined by the  
825 comparative  $C_T$  method and values were expressed as fold-change.

826 Comparative  $C_T$  equation:

827  $2-\Delta\Delta C_T = [(C_T \text{ gene of interest} - C_T \text{ hMAPT internal control})]_{\text{PLX-treated mice}} - [(C_T \text{ gene of}$   
828  $\text{interest} - C_T \text{ hMAPT internal control})]_{\text{vehicle-treated mice}}$

### 829 **In vivo bioluminescence imaging**

830 Bioluminescence imaging was performed on the brains and spinal cords of albino bigenic  
831 Tg(2541:*Gfap-luc*) homozygous mice after receiving an intraperitoneal injection of 25 mg/kg  
832 cyclic luciferin-1 (CycLuc1) sodium salt solution (Aobious; AOB6377) prepared in PBS, pH 7.4.  
833 After CycLuc1 injection, mice were placed in an anesthetization chamber and exposed to an  
834 isoflurane/oxygen gas mix for ten minutes. During this time, the heads of the mice were shaved  
835 to enhance the bioluminescence signal. After anesthetization, mice were placed in an IVIS  
836 Lumina III small animal imaging system (PerkinElmer) and were kept under constant  
837 anesthesia. Mice were imaged for 60 s duration at three time points (14, 16 and 18 minutes)  
838 following CycLuc1 injection as determined in one-hour time-lapse calibration studies. After  
839 image acquisition, the mice were allowed to recover in their home cages. Brain and spinal cord  
840 bioluminescence values were calculated from images displaying surface radiance using  
841 standardized regions of interest and were then converted to total photon flux (photons per  
842 second) using Living Image software version 4.4 (PerkinElmer).

### 843 **Confocal imaging of thick tissue sections**

844 Vibratome-sectioned brain slices (40  $\mu\text{m}$  thick) were immunolabeled with Iba1, AT8, and/or  
845 CD206 (Biorad, MCA2235) antibodies using standard protocols for free-floating sections in  
846 multi-well plates. Sections were mounted using PermaFluor and #1.5 coverglass. Using a Leica  
847 SP8 confocal microscope equipped with HyD detectors and an AOBS, samples were first  
848 visualized using Navigator function to acquire an overview image of each slice using a 20x  
849 water-immersion lens (0.95 NA). From the mosaic image, smaller tiled-ROIs were marked in the  
850 forebrain and hindbrain to acquire high-resolution, sequential-scanned image stacks using a  
851 63x water-immersion lens (1.2 NA). Eight-bit image z-stacks (1  $\mu\text{m}$  steps) were collected at  
852 512x512-pixel resolution. Images were processed using custom MATLAB code.

### 853 **Microglial morphology analysis**

854 Microglia morphology was analyzed using a custom script in MATLAB. Briefly, raw confocal  
855 image stacks were smoothed and then maximally projected. Isolated microglia cells were  
856 manually selected for analysis. The selected microglia region was binarized with an intensity  
857 threshold, and then the cell body was detected by fitting a largest circle in the binary mask. After

858 excluding the cell body region, the remaining microglia processes were skeletonized and branch  
859 number, branch length and bounding box were measured using “regionprops” and “bwmorph”  
860 commands.

## 861 **Statistical analysis**

862 Statistical analyses were performed using GraphPad Prism 8. Comparisons between two  
863 groups were performed by two-tailed unpaired t test or by Mann-Whitney nonparametric test.  
864 For comparisons of more than two groups, one-, two-, or three-way ANOVA was performed with  
865 Holm-Šidák post hoc analysis. Following ANOVA, residuals were evaluated for normal  
866 distribution using the Anderson-Darling test and the data were evaluated for equal variance  
867 using the Brown-Forsythe test. If both assumptions were violated ( $P < 0.05$ ), the data was  
868 reanalyzed using Welch’s ANOVA with Dunnett T3 post hoc analysis. For repeated-measures  
869 ANOVA, sphericity was not assumed and the Geisser-Greenhouse correction was applied. If  
870 any data points were missing, a mixed-effects model (Restricted maximum likelihood; REML)  
871 was used instead. Pearson’s correlation tests were performed as one-tailed tests as, in each  
872 case, we had a directional hypothesis of either positive or negative correlation. Sample sizes  
873 are shown in graphs with each data point representing an individual mouse, or are reported in  
874 the figure legends. Experimental replication and exact statistical tests used are detailed in the  
875 figure legends.

876

## 877 **ACKNOWLEDGEMENTS**

878 We thank Plexxikon, Inc for providing the PLX3977, PLX5622 and PLX73086 compounds, and  
879 Andrey Reymar and Brian West for consulting on drug dosing and chow formulation. We thank  
880 Julian Castaneda, Karina Walker and Lyn Batia (and their staff) at the UCSF Hunter’s Point  
881 animal facility for coordinating transgenic mouse development, breeding, and drug efficacy  
882 studies. We thank Masahiro Inoue (Daiichi Sankyo, Inc.) for insightful discussions on  
883 pharmacokinetics and pharmacodynamics in our study. We thank Stanley Prusiner and David  
884 Ramsay at the UCSF Institute for Neurodegenerative Diseases (IND) for access to equipment  
885 and technical resources critical for the completion of this study. We thank the following UCSF  
886 IND staff for technical assistance: Abby Oehler, Rigoberto Roman-Albarran, Julia Becker, Marta  
887 Gavidia and Manuel Elepano. The study was funded by grants from the National Institutes of  
888 Health (NIH): (# RF1 AG061874 and P01 AG002132), as well as by the Rainwater Charitable

889 Foundation, the Sherman Fairchild Foundation, the Henry M. Jackson Foundation, and Daiichi  
890 Sankyo, Inc. P.Y. was funded by Shanghai Municipal Science and Technology Major Project  
891 and Shanghai Natural Science Foundation (22ZR1415000). Competing interests: The Institute  
892 for Neurodegenerative Diseases (UCSF) had a research collaboration with Daiichi Sankyo, Inc.  
893 (Tokyo, Japan).

894

## 895 **AUTHOR CONTRIBUTIONS**

896 C.C. conceived the study and designed experiments. N.J., E.C., T.P.L., W.Y., A.B., B.M.R.,  
897 M.C.S., H.M., K.G., A.A., and C.C. performed experiments and prepared data. N.J., P.Y., and  
898 C.C. analyzed and interpreted data. N.J., P.Y., and C.C. wrote the paper. C.C. supervised the  
899 study.

900

## 901 **DATA AVAILABILITY**

902 The authors declare that all other data supporting the findings of this study are available within  
903 the paper and its supplementary files.

904

## 905 **CODE AVAILABILITY**

906 The transcriptome data (Nanostring) that support the findings of this study, specifically in  
907 Figures 6-9, are available from Github with the following link: [https://gitfront.io/r/user-  
908 8849465/665dd65fd9d9e78650ed02b9f30236d99240de39/UCSF-PLX-nanostring/](https://gitfront.io/r/user-8849465/665dd65fd9d9e78650ed02b9f30236d99240de39/UCSF-PLX-nanostring/)

909

910

911

## 912 **REFERENCES**

913 1. Dionisio-Santos, D.A., Olschowka, J.A. & O'Banion, M.K. Exploiting microglial and  
914 peripheral immune cell crosstalk to treat Alzheimer's disease. *J Neuroinflammation* **16**, 74  
915 (2019).

- 916 2. Masuda, T., *et al.* Spatial and temporal heterogeneity of mouse and human microglia at  
917 single-cell resolution. *Nature* **566**, 388-392 (2019).
- 918 3. Kodama, L. & Gan, L. Do Microglial Sex Differences Contribute to Sex Differences in  
919 Neurodegenerative Diseases? *Trends Mol Med* **25**, 741-749 (2019).
- 920 4. Stratoulis, V., Venero, J.L., Tremblay, M.E. & Joseph, B. Microglial subtypes: diversity  
921 within the microglial community. *EMBO J* **38**, e101997 (2019).
- 922 5. Schwabe, T., Srinivasan, K. & Rhinn, H. Shifting paradigms: The central role of microglia  
923 in Alzheimer's disease. *Neurobiol Dis* **143**, 104962 (2020).
- 924 6. Shi, Y. & Holtzman, D.M. Interplay between innate immunity and Alzheimer disease:  
925 APOE and TREM2 in the spotlight. *Nat Rev Immunol* **18**, 759-772 (2018).
- 926 7. Maphis, N., *et al.* Reactive microglia drive tau pathology and contribute to the spreading  
927 of pathological tau in the brain. *Brain* **138**, 1738-1755 (2015).
- 928 8. Stancu, I.C., *et al.* Aggregated Tau activates NLRP3-ASC inflammasome exacerbating  
929 exogenously seeded and non-exogenously seeded Tau pathology in vivo. *Acta*  
930 *Neuropathol* **137**, 599-617 (2019).
- 931 9. Ising, C., *et al.* NLRP3 inflammasome activation drives tau pathology. *Nature* **575**, 669-  
932 673 (2019).
- 933 10. Rexach, J.E., *et al.* Tau Pathology Drives Dementia Risk-Associated Gene Networks  
934 toward Chronic Inflammatory States and Immunosuppression. *Cell Rep* **33**, 108398  
935 (2020).
- 936 11. Allen, M., *et al.* Divergent brain gene expression patterns associate with distinct cell-  
937 specific tau neuropathology traits in progressive supranuclear palsy. *Acta Neuropathol*  
938 **136**, 709-727 (2018).
- 939 12. Wang, H., *et al.* Genome-wide RNAseq study of the molecular mechanisms underlying  
940 microglia activation in response to pathological tau perturbation in the rTg4510 tau  
941 transgenic animal model. *Mol Neurodegener* **13**, 65 (2018).
- 942 13. Matarin, M., *et al.* A genome-wide gene-expression analysis and database in transgenic  
943 mice during development of amyloid or tau pathology. *Cell Rep* **10**, 633-644 (2015).
- 944 14. Stanley, E.R. & Chitu, V. CSF-1 receptor signaling in myeloid cells. *Cold Spring Harb*  
945 *Perspect Biol* **6**(2014).
- 946 15. Cannarile, M.A., *et al.* Colony-stimulating factor 1 receptor (CSF1R) inhibitors in cancer  
947 therapy. *J Immunother Cancer* **5**, 53 (2017).
- 948 16. Asai, H., *et al.* Depletion of microglia and inhibition of exosome synthesis halt tau  
949 propagation. *Nat Neurosci* **18**, 1584-1593 (2015).
- 950 17. Shi, Y., *et al.* Microglia drive APOE-dependent neurodegeneration in a tauopathy mouse  
951 model. *J Exp Med* **216**, 2546-2561 (2019).
- 952 18. Mancuso, R., *et al.* CSF1R inhibitor JNJ-40346527 attenuates microglial proliferation and  
953 neurodegeneration in P301S mice. *Brain* **142**, 3243-3264 (2019).
- 954 19. Bennett, R.E., *et al.* Partial reduction of microglia does not affect tau pathology in aged  
955 mice. *J Neuroinflammation* **15**, 311 (2018).
- 956 20. Condello, C., DeGrado, W.F. & Prusiner, S.B. Prion biology: implications for Alzheimer's  
957 disease therapeutics. *Lancet Neurol* **19**, 802-803 (2020).
- 958 21. Tap, W.D., *et al.* Structure-Guided Blockade of CSF1R Kinase in Tenosynovial Giant-Cell  
959 Tumor. *N Engl J Med* **373**, 428-437 (2015).
- 960 22. Spangenberg, E., *et al.* Sustained microglial depletion with CSF1R inhibitor impairs  
961 parenchymal plaque development in an Alzheimer's disease model. *Nat Commun* **10**,  
962 3758 (2019).
- 963 23. Allen, B., *et al.* Abundant tau filaments and nonapoptotic neurodegeneration in transgenic  
964 mice expressing human P301S tau protein. *J Neurosci* **22**, 9340-9351 (2002).
- 965 24. Bugiani, O., *et al.* Frontotemporal dementia and corticobasal degeneration in a family with  
966 a P301S mutation in tau. *J Neuropathol Exp Neurol* **58**, 667-677 (1999).

- 967 25. Goedert, M., Jakes, R. & Crowther, R.A. Effects of frontotemporal dementia FTDP-17  
968 mutations on heparin-induced assembly of tau filaments. *FEBS Lett* **450**, 306-311 (1999).
- 969 26. Sperfeld, A.D., *et al.* FTDP-17: an early-onset phenotype with parkinsonism and epileptic  
970 seizures caused by a novel mutation. *Ann Neurol* **46**, 708-715 (1999).
- 971 27. Johnson, N.R., *et al.* Evidence for sortilin modulating regional accumulation of human tau  
972 prions in transgenic mice. *Proc Natl Acad Sci U S A* **114**, E11029-E11036 (2017).
- 973 28. Kovacs, G.G., *et al.* Distribution patterns of tau pathology in progressive supranuclear  
974 palsy. *Acta Neuropathol* **140**, 99-119 (2020).
- 975 29. Sanders, D.W., *et al.* Distinct tau prion strains propagate in cells and mice and define  
976 different tauopathies. *Neuron* **82**, 1271-1288 (2014).
- 977 30. Aoyagi, A., *et al.* Abeta and tau prion-like activities decline with longevity in the Alzheimer's  
978 disease human brain. *Sci Transl Med* **11**(2019).
- 979 31. Elmore, M.R., Lee, R.J., West, B.L. & Green, K.N. Characterizing newly repopulated  
980 microglia in the adult mouse: impacts on animal behavior, cell morphology, and  
981 neuroinflammation. *PLoS One* **10**, e0122912 (2015).
- 982 32. Iba, M., *et al.* Synthetic tau fibrils mediate transmission of neurofibrillary tangles in a  
983 transgenic mouse model of Alzheimer's-like tauopathy. *J Neurosci* **33**, 1024-1037 (2013).
- 984 33. Seeley, W.W., Crawford, R.K., Zhou, J., Miller, B.L. & Greicius, M.D. Neurodegenerative  
985 diseases target large-scale human brain networks. *Neuron* **62**, 42-52 (2009).
- 986 34. Gustke, N., Trinczek, B., Biernat, J., Mandelkow, E.M. & Mandelkow, E. Domains of tau  
987 protein and interactions with microtubules. *Biochemistry* **33**, 9511-9522 (1994).
- 988 35. Lei, F., *et al.* CSF1R inhibition by a small-molecule inhibitor is not microglia specific;  
989 affecting hematopoiesis and the function of macrophages. *Proc Natl Acad Sci U S A* **117**,  
990 23336-23338 (2020).
- 991 36. Bellver-Landete, V., *et al.* Microglia are an essential component of the neuroprotective  
992 scar that forms after spinal cord injury. *Nat Commun* **10**, 518 (2019).
- 993 37. Luo, J., *et al.* Colony-stimulating factor 1 receptor (CSF1R) signaling in injured neurons  
994 facilitates protection and survival. *J Exp Med* **210**, 157-172 (2013).
- 995 38. Jul, P., *et al.* Hyperactivity with Agitative-Like Behavior in a Mouse Tauopathy Model. *J*  
996 *Alzheimers Dis* **49**, 783-795 (2016).
- 997 39. Dumont, M., *et al.* Behavioral deficit, oxidative stress, and mitochondrial dysfunction  
998 precede tau pathology in P301S transgenic mice. *FASEB J* **25**, 4063-4072 (2011).
- 999 40. Wang, X., *et al.* Early intervention of tau pathology prevents behavioral changes in the  
1000 rTg4510 mouse model of tauopathy. *PLoS One* **13**, e0195486 (2018).
- 1001 41. Bacioglu, M., *et al.* Neurofilament Light Chain in Blood and CSF as Marker of Disease  
1002 Progression in Mouse Models and in Neurodegenerative Diseases. *Neuron* **91**, 56-66  
1003 (2016).
- 1004 42. Ashton, N.J., *et al.* Increased plasma neurofilament light chain concentration correlates  
1005 with severity of post-mortem neurofibrillary tangle pathology and neurodegeneration. *Acta*  
1006 *Neuropathol Commun* **7**, 5 (2019).
- 1007 43. Rojas, J.C., *et al.* CSF neurofilament light chain and phosphorylated tau 181 predict  
1008 disease progression in PSP. *Neurology* **90**, e273-e281 (2018).
- 1009 44. Benner, B., *et al.* Pexidartinib, a Novel Small Molecule CSF-1R Inhibitor in Use for  
1010 Tenosynovial Giant Cell Tumor: A Systematic Review of Pre-Clinical and Clinical  
1011 Development. *Drug Des Devel Ther* **14**, 1693-1704 (2020).
- 1012 45. Liddelow, S.A., *et al.* Neurotoxic reactive astrocytes are induced by activated microglia.  
1013 *Nature* **541**, 481-487 (2017).
- 1014 46. Watts, J.C., *et al.* Bioluminescence imaging of Abeta deposition in bigenic mouse models  
1015 of Alzheimer's disease. *Proc Natl Acad Sci U S A* **108**, 2528-2533 (2011).
- 1016 47. Bellucci, A., *et al.* Induction of inflammatory mediators and microglial activation in mice  
1017 transgenic for mutant human P301S tau protein. *Am J Pathol* **165**, 1643-1652 (2004).

- 1018 48. Ishizawa, K. & Dickson, D.W. Microglial activation parallels system degeneration in  
1019 progressive supranuclear palsy and corticobasal degeneration. *J Neuropathol Exp Neurol*  
1020 **60**, 647-657 (2001).
- 1021 49. Friedman, B.A., *et al.* Diverse Brain Myeloid Expression Profiles Reveal Distinct Microglial  
1022 Activation States and Aspects of Alzheimer's Disease Not Evident in Mouse Models. *Cell*  
1023 *Rep* **22**, 832-847 (2018).
- 1024 50. Keren-Shaul, H., *et al.* A Unique Microglia Type Associated with Restricting Development  
1025 of Alzheimer's Disease. *Cell* **169**, 1276-1290 e1217 (2017).
- 1026 51. Mucha, P.J., Richardson, T., Macon, K., Porter, M.A. & Onnela, J.P. Community structure  
1027 in time-dependent, multiscale, and multiplex networks. *Science* **328**, 876-878 (2010).
- 1028 52. Wang, C., *et al.* Microglial NF-kappaB drives tau spreading and toxicity in a mouse model  
1029 of tauopathy. *Nat Commun* **13**, 1969 (2022).
- 1030 53. Hong, J., *et al.* Microglial Toll-like receptor 2 contributes to kainic acid-induced glial  
1031 activation and hippocampal neuronal cell death. *J Biol Chem* **285**, 39447-39457 (2010).
- 1032 54. Heneka, M.T., *et al.* NLRP3 is activated in Alzheimer's disease and contributes to  
1033 pathology in APP/PS1 mice. *Nature* **493**, 674-678 (2013).
- 1034 55. Krasemann, S., *et al.* The TREM2-APOE Pathway Drives the Transcriptional Phenotype  
1035 of Dysfunctional Microglia in Neurodegenerative Diseases. *Immunity* **47**, 566-581 e569  
1036 (2017).
- 1037 56. Dejanovic, B., *et al.* Changes in the Synaptic Proteome in Tauopathy and Rescue of Tau-  
1038 Induced Synapse Loss by C1q Antibodies. *Neuron* **100**, 1322-1336 e1327 (2018).
- 1039 57. Yun, S.P., *et al.* Block of A1 astrocyte conversion by microglia is neuroprotective in models  
1040 of Parkinson's disease. *Nat Med* **24**, 931-938 (2018).
- 1041 58. Kerkhofs, D., *et al.* Pharmacological depletion of microglia and perivascular macrophages  
1042 prevents Vascular Cognitive Impairment in Ang II-induced hypertension. *Theranostics* **10**,  
1043 9512-9527 (2020).
- 1044 59. Liu, Y., *et al.* Concentration-dependent effects of CSF1R inhibitors on oligodendrocyte  
1045 progenitor cells ex vivo and in vivo. *Exp Neurol* **318**, 32-41 (2019).
- 1046 60. Zhan, L., *et al.* A MAC2-positive progenitor-like microglial population is resistant to CSF1R  
1047 inhibition in adult mouse brain. *Elife* **9**(2020).
- 1048 61. Spangenberg, E.E., *et al.* Eliminating microglia in Alzheimer's mice prevents neuronal loss  
1049 without modulating amyloid-beta pathology. *Brain* **139**, 1265-1281 (2016).
- 1050 62. Kodama, L., *et al.* Microglial microRNAs mediate sex-specific responses to tau pathology.  
1051 *Nat Neurosci* **23**, 167-171 (2020).
- 1052 63. Guneykaya, D., *et al.* Transcriptional and Translational Differences of Microglia from Male  
1053 and Female Brains. *Cell Rep* **24**, 2773-2783 e2776 (2018).
- 1054 64. Kang, S.S., *et al.* Microglial translational profiling reveals a convergent APOE pathway  
1055 from aging, amyloid, and tau. *J Exp Med* **215**, 2235-2245 (2018).
- 1056 65. Hampton, D.W., *et al.* Cell-mediated neuroprotection in a mouse model of human  
1057 tauopathy. *J Neurosci* **30**, 9973-9983 (2010).
- 1058 66. Berve, K., West, B.L., Martini, R. & Groh, J. Sex- and region-biased depletion of  
1059 microglia/macrophages attenuates CLN1 disease in mice. *J Neuroinflammation* **17**, 323  
1060 (2020).
- 1061 67. Vinet, J., *et al.* Neuroprotective function for ramified microglia in hippocampal  
1062 excitotoxicity. *J Neuroinflammation* **9**, 27 (2012).
- 1063 68. Busche, M.A., *et al.* Tau impairs neural circuits, dominating amyloid-beta effects, in  
1064 Alzheimer models in vivo. *Nat Neurosci* **22**, 57-64 (2019).
- 1065 69. Badimon, A., *et al.* Negative feedback control of neuronal activity by microglia. *Nature* **586**,  
1066 417-423 (2020).



- 1067 70. Liu, M., *et al.* Microglia depletion exacerbates acute seizures and hippocampal neuronal  
1068 degeneration in mouse models of epilepsy. *Am J Physiol Cell Physiol* **319**, C605-C610  
1069 (2020).
- 1070 71. Sosna, J., *et al.* Early long-term administration of the CSF1R inhibitor PLX3397 ablates  
1071 microglia and reduces accumulation of intraneuronal amyloid, neuritic plaque deposition  
1072 and pre-fibrillar oligomers in 5XFAD mouse model of Alzheimer's disease. *Mol*  
1073 *Neurodegener* **13**, 11 (2018).
- 1074 72. Pinto, B., *et al.* Rescuing Over-activated Microglia Restores Cognitive Performance in  
1075 Juvenile Animals of the Dp(16) Mouse Model of Down Syndrome. *Neuron* **108**, 887-904  
1076 e812 (2020).
- 1077 73. Dagher, N.N., *et al.* Colony-stimulating factor 1 receptor inhibition prevents microglial  
1078 plaque association and improves cognition in 3xTg-AD mice. *J Neuroinflammation* **12**, 139  
1079 (2015).
- 1080 74. Hillmer, A.T., *et al.* Microglial depletion and activation: A [(11)C]PBR28 PET study in  
1081 nonhuman primates. *EJNMMI Res* **7**, 59 (2017).
- 1082 75. Reu, P., *et al.* The Lifespan and Turnover of Microglia in the Human Brain. *Cell Rep* **20**,  
1083 779-784 (2017).
- 1084 76. Horti, A.G., *et al.* PET imaging of microglia by targeting macrophage colony-stimulating  
1085 factor 1 receptor (CSF1R). *Proc Natl Acad Sci U S A* **116**, 1686-1691 (2019).
- 1086 77. Lee, S.H., *et al.* Antibody-Mediated Targeting of Tau In Vivo Does Not Require Effector  
1087 Function and Microglial Engagement. *Cell Rep* **16**, 1690-1700 (2016).
- 1088 78. Elmore, M.R., *et al.* Colony-stimulating factor 1 receptor signaling is necessary for  
1089 microglia viability, unmasking a microglia progenitor cell in the adult brain. *Neuron* **82**,  
1090 380-397 (2014).
- 1091 79. Barghorn, S., Biernat, J. & Mandelkow, E. Purification of recombinant tau protein and  
1092 preparation of Alzheimer-paired helical filaments in vitro. *Methods Mol Biol* **299**, 35-51  
1093 (2005).
- 1094 80. Zhang, Y., *et al.* Purification and Characterization of Progenitor and Mature Human  
1095 Astrocytes Reveals Transcriptional and Functional Differences with Mouse. *Neuron* **89**,  
1096 37-53 (2016).
- 1097 81. Wu, Y.E., Pan, L., Zuo, Y., Li, X. & Hong, W. Detecting Activated Cell Populations Using  
1098 Single-Cell RNA-Seq. *Neuron* **96**, 313-329 e316 (2017).
- 1099 82. Chiu, I.M., *et al.* A neurodegeneration-specific gene-expression signature of acutely  
1100 isolated microglia from an amyotrophic lateral sclerosis mouse model. *Cell Rep* **4**, 385-  
1101 401 (2013).
- 1102

1103 **FIGURES**

1104

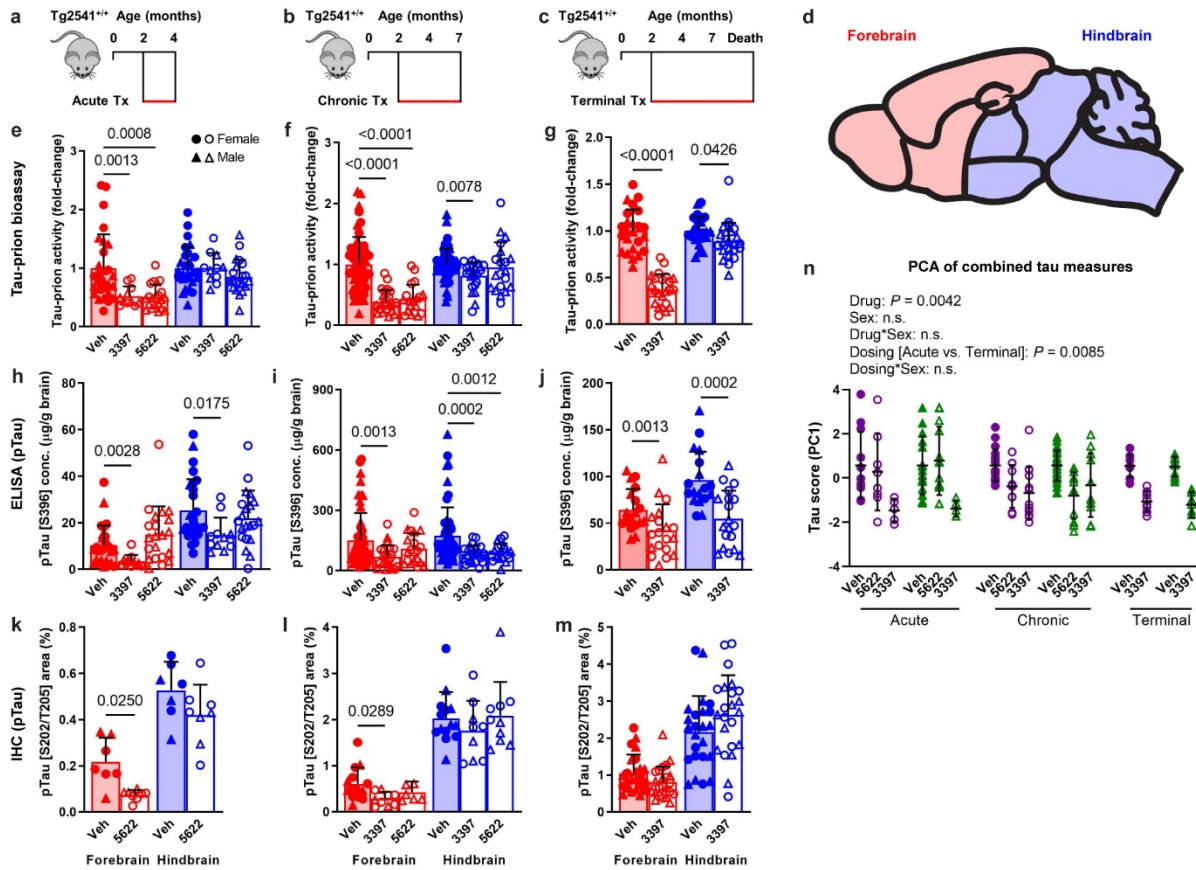

1105

1106 **Fig. 1| CSF1R inhibition by three treatment paradigms reduces pathogenic tau levels in**

1107 **the brains of Tg2541 mice. a–c, Schematics of acute (a), chronic (b), or terminal (c) PLX**

1108 **treatment of Tg2541 mice from 2–4 mo of age, 2–7 mo of age, or 2 mo of age until death,**

1109 **respectively. d, Sagittal view of the mouse brain divided into two regions: the forebrain,**

1110 **containing the cortex, hippocampus, striatum, and olfactory bulb; and the hindbrain,**

1111 **containing the thalamus, hypothalamus, midbrain, cerebellum, and brain stem. e–g, Tau-prion levels in**

1112 **forebrain and hindbrain tissue homogenates of Tg2541 mice receiving acute (e), chronic (f), or**

1113 **terminal (g) treatment with vehicle, PLX3397 (275 mg/kg oral), or PLX5622 (1200 mg/kg oral),**

1114 **measured using the HEK293T cell tau-prion bioassay and normalized to the vehicle-treated**

1115 **group. h–j, Levels of pTau [S396] measured by ELISA in formic acid extracts of forebrain and**

1116 **hindbrain tissue homogenates of Tg2541 mice receiving acute (h), chronic (i), or terminal**

1117 **treatment (j) with vehicle, PLX3397, or PLX5622, normalized to total protein concentration.**

1118 **k–m, Quantification of pTau [S202/T205]-positive area by IHC analysis of forebrain and**

1119 **hindbrain areas of Tg2541 mice receiving acute (k), chronic (l), or terminal (m) treatment with**

1120 vehicle, PLX3397, or PLX5622. Welch ANOVA with Dunnett T3 post hoc testing was used in **e**,  
1121 **f**, **h**, **i**, and **l**. Two-way ANOVA with Holm-Šidák post hoc testing was used in **g**, **j**, **k**, and **m**. *P*  
1122 values for all statistically significant differences ( $P < 0.05$ ) are shown. **n**, Principal component  
1123 analysis was performed, using all tau-prion and pTau[S396] data presented in Fig. 1e–j to  
1124 calculate a ‘tau score’ that represents the amount of pathogenic tau in both the forebrains and  
1125 hindbrains of Tg2541 mice. All data was first standardized to the respective vehicle-treated  
1126 group of the same sex and same dosing paradigm. Then, two principal components (PC1 and  
1127 PC2) were identified which accounted for 70.7% of the total variance in the data. Multiple linear  
1128 regression was performed on PC1 of the drug-treated groups to evaluate the main effects sex  
1129 and dosing paradigm, and the dosing\*sex interaction effect. Multiple linear regression was  
1130 performed on all groups to determine the main effect of drug and the drug\*sex interaction effect.  
1131 *P* values for all statistically significant differences ( $P < 0.05$ ) are shown. n.s. indicates not  
1132 statistically significant. PC2 was also evaluated, but only the drug main effect was statistically  
1133 significant. In **e–n**, each symbol represents the forebrain or hindbrain of an individual mouse,  
1134 with female mice shown as closed or open circles and male mice shown as closed or open  
1135 triangles. Error bars represent the s.d. of the mean.

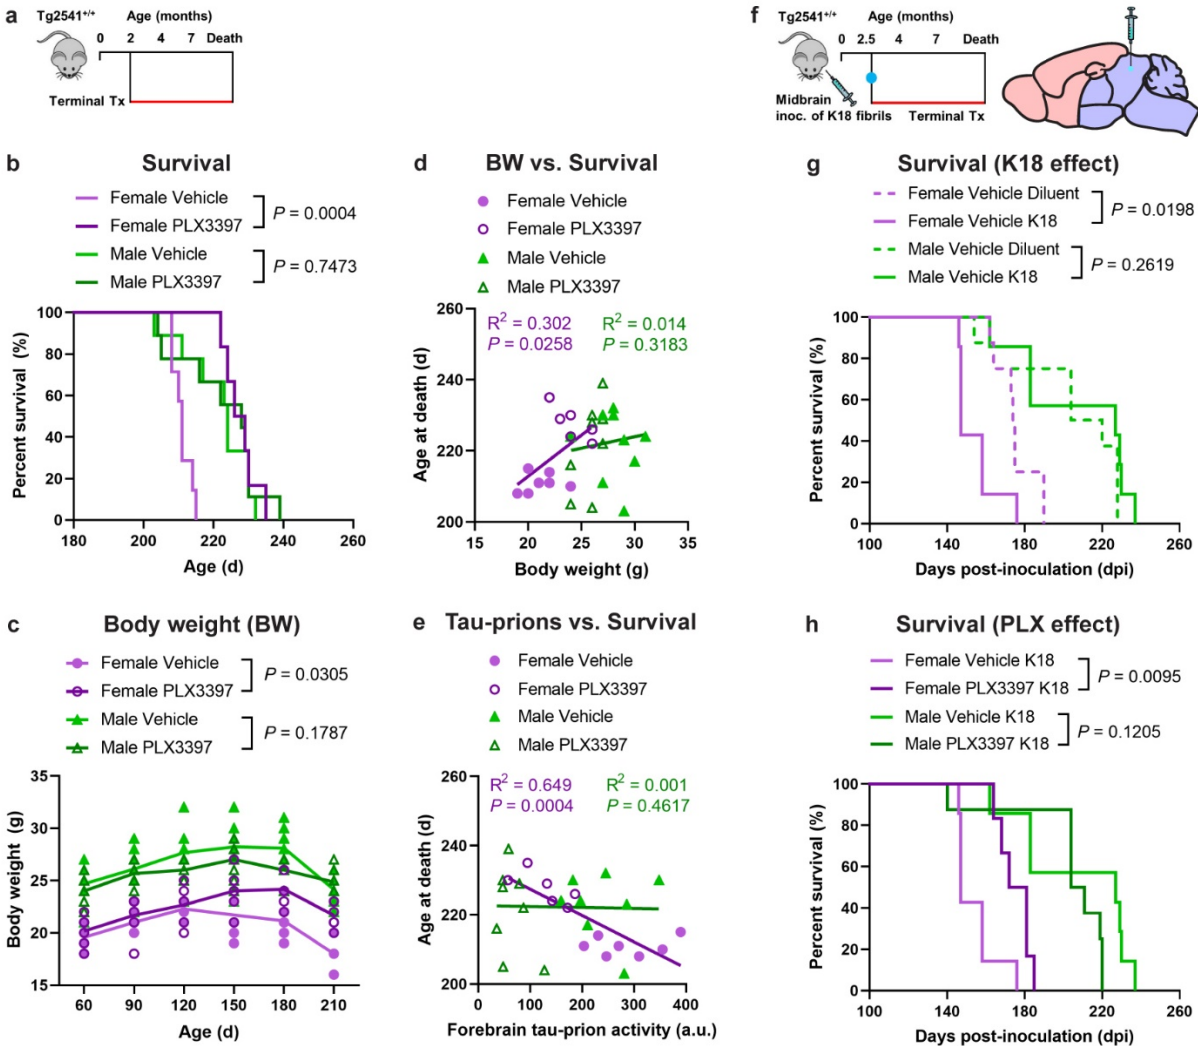

1136

1137 **Fig. 2| CSF1R inhibition extends survival of female Tg2541 mice.** **a**, Schematic of terminal  
1138 PLX3397 treatment (275 mg/kg oral) of Tg2541 mice from 2 mo of age until death. **b**, Kaplan-  
1139 Meier plot showing percent survival of female or male Tg2541 mice treated with vehicle or  
1140 PLX3397.  $n=7$  mice for Female Vehicle;  $n=6$  mice for Female PLX3397;  $n=9$  mice for Male  
1141 Vehicle;  $n=9$  mice for Male PLX3397. **c**, Body weights of female or male Tg2541 mice treated  
1142 with vehicle or PLX3397. Differences in weight between vehicle and PLX3397 treatment in  
1143 female or male mice were evaluated by mixed-effects analysis (Restricted maximum likelihood).  
1144 Each symbol represents an individual mouse and lines indicate group means. **d**, **e**, Correlation  
1145 plots for body weight at 180 d of age (**d**) or forebrain tau-prion activity at death (**e**) and survival  
1146 for female or male Tg2541 mice treated with vehicle or PLX3397. Each symbol represents an  
1147 individual mouse and linear regression lines are shown for female or male mice, with vehicle-  
1148 and PLX3397-treated mice combined. Pearson's correlation analysis was performed and the

1149 results are shown. **f**, Schematic of terminal PLX3397 treatment of Tg2541 mice from 2.5 mo of  
1150 age until death, following inoculation of K18 tau fibrils into the midbrain (hindbrain region) at 2.5  
1151 mo of age. **g**, Kaplan-Meier plot showing percent survival of female or male Tg2541 mice  
1152 inoculated with K18 tau fibrils or diluent. n=8 mice for Female Vehicle Diluent; n=7 mice for  
1153 Female Vehicle K18; n=8 mice for Male Vehicle Diluent; n=7 mice for Male Vehicle K18.  
1154 Differences in survival between diluent and K18 inoculation in male or female mice treated with  
1155 vehicle were evaluated by Log-rank (Mantel-Cox) test. **h**, Kaplan-Meier plot showing percent  
1156 survival of female or male Tg2541 mice inoculated with K18 tau fibrils and then receiving  
1157 terminal treatment of vehicle or PLX3397 (275 mg/kg oral). n=7 mice for Female Vehicle K18;  
1158 n=6 mice for Female PLX3397 K18; n=7 mice for Male Vehicle K18; n=8 mice for Male  
1159 PLX3397 K18. In **b**, **g**, and **h**, differences in survival between treatment groups were evaluated  
1160 by Log-rank (Mantel-Cox) test.

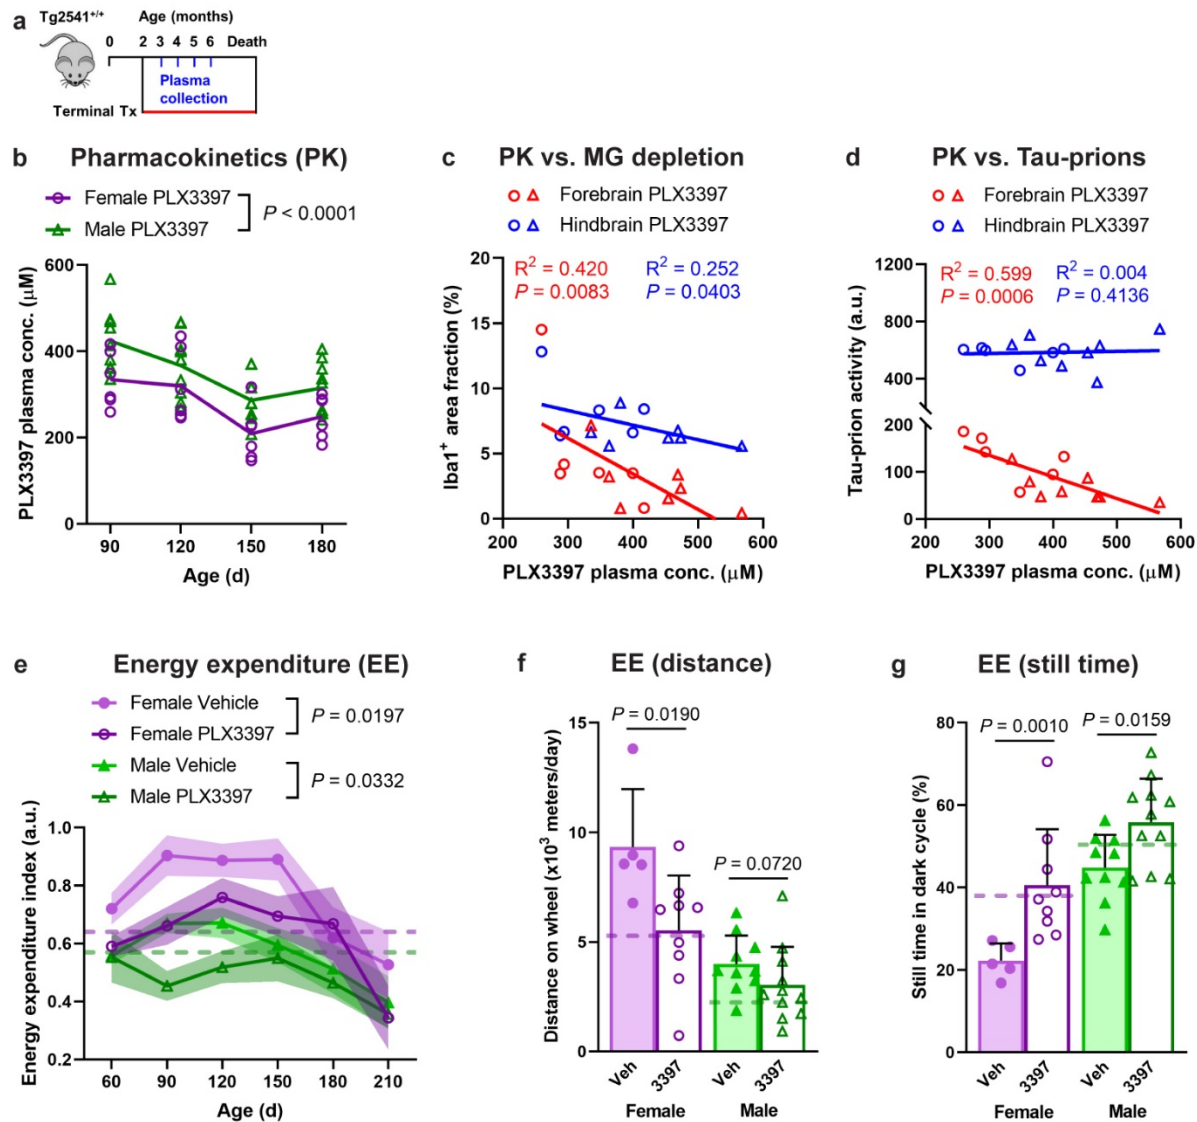

1161

1162 **Fig. 3| PLX3397 has sex-dependent pharmacokinetics and reduces hyperactivity in**  
 1163 **Tg2541 mice.** **a**, Schematic of terminal PLX3397 treatment (275 mg/kg oral) of Tg2541 mice  
 1164 from 2 mo of age until death and blood plasma collected at 3, 4, 5, and 6 mo of age. **b**, Plasma  
 1165 concentration of PLX3397 in female or male Tg2541 mice. Each symbol represents an  
 1166 individual mouse and the lines indicate group means. The difference between female and male  
 1167 mice was assessed by two-way repeated measures ANOVA. **c**, **d**, Correlation plots for plasma  
 1168 concentration of PLX3397 at 90 d age and Iba1 area fraction by IHC (**c**) or tau-prion activity (**d**)  
 1169 in the forebrains or hindbrains of Tg2541 mice at death. Female mice are shown as open circles  
 1170 and male mice shown as open triangles. Linear regression was performed with female and male  
 1171 mice combined and best-fit lines are shown. Pearson's correlation analysis was performed and

1172 the results are shown. **e**, Longitudinal energy expenditure indices (see Methods) of female or  
1173 male Tg2541 mice treated with vehicle or PLX3397. Symbols represent the group means and  
1174 shaded regions indicate the s.d. of the mean. Group sizes are the same as shown in **f** and **g**.  
1175 Differences between vehicle and PLX3397 treatment in female or male mice were assessed by  
1176 three-way repeated measures ANOVA. **f**, **g**, Average distance traveled on the running wheel (**f**)  
1177 or still time during the dark cycle (**g**) in female or male Tg2541 mice treated with vehicle or  
1178 PLX3397, and measured between 90-d-old and 150-d-old. Each symbol represents an  
1179 individual mouse and the dashed lines indicate the same measurements in 90-d-old wild type  
1180 mice. Differences between vehicle and PLX3397 treatment in female or male mice were  
1181 assessed by Mann-Whitney test.

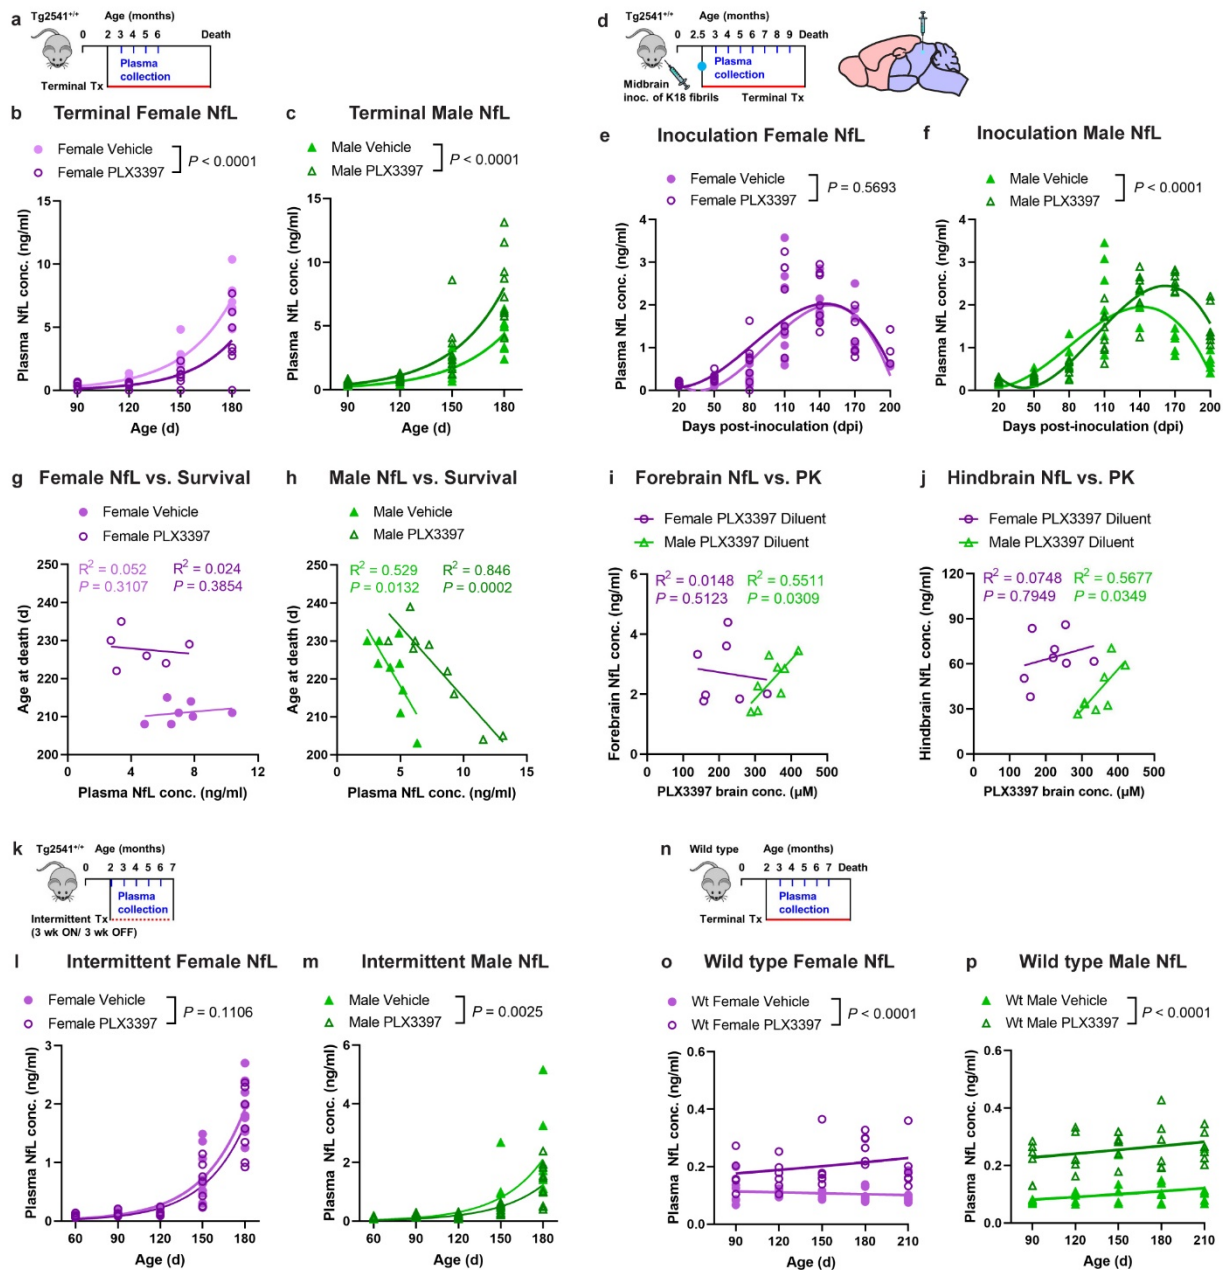

1182

1183 **Fig. 4| Plasma NfL levels are reduced by PLX3397 in female Tg2541 mice and increased**  
 1184 **in male mice.** **a**, Schematic of terminal PLX3397 treatment (275 mg/kg oral) of Tg2541 mice  
 1185 from 2 mo of age until death and blood plasma collected at 3, 4, 5, and 6 mo of age. **b, c**,  
 1186 Plasma concentration of NfL in female (**b**) or male (**c**) Tg2541 mice treated with vehicle or  
 1187 PLX3397. **d**, Schematic of terminal PLX3397 treatment of Tg2541 mice from 2.5 mo of age until  
 1188 death, following inoculation of K18 tau fibrils into the midbrain (hindbrain region) at 2.5 mo of  
 1189 age, and blood plasma collected monthly thereafter until death. **e, f**, Plasma concentration of  
 1190 NfL in female (**e**) or male (**f**) Tg2541 mice inoculated with K18 followed by terminal treatment



1191 with vehicle or PLX3397, plotted over days post-inoculation (dpi). **g, h**, Correlation plots for  
1192 plasma NfL concentration and survival in female (**g**) or male (**h**) Tg2541 mice. Each symbol  
1193 represents an individual mouse. **i, j**, Correlation plots for brain concentration of PLX3397 and  
1194 NfL concentration in the (**i**) forebrains or (**j**) hindbrains of Tg2541 mice receiving midbrain  
1195 inoculation with diluent. Each symbol represents the forebrain or hindbrain of an individual  
1196 mouse. In **g–j**, linear regression and Pearson’s correlation analysis were performed and the  
1197 results are shown. **k**, Schematic of intermittent PLX treatment of Tg2541 mice from 2–7 mo of  
1198 age, with three weeks on treatment followed by three weeks off of treatment, and blood plasma  
1199 collected at 3, 4, 5, and 6 mo of age. **l, m**, Plasma concentration of NfL in female (**l**) or male (**m**)  
1200 Tg2541 mice receiving intermittent treatment with vehicle or PLX3397. **n**, Schematic of terminal  
1201 PLX treatment of C57BL/6J wild type mice (Wt) from 2 mo of age until death and blood plasma  
1202 collected at 3, 4, 5, 6, and 7 mo of age. **o, p**, Plasma concentration of NfL in female (**o**) or male  
1203 (**p**) Wt mice treated with vehicle or PLX3397. In **b, c, e, f, l, m, o, and p**, the differences  
1204 between vehicle or PLX3397 treatment were evaluated by non-linear regression using  
1205 exponential growth models (**b, c, l, m, o, and p**) or third-order polynomial models (**e and f**) and  
1206 the best-fit lines and statistical results are shown. Each symbol represents an individual mouse.

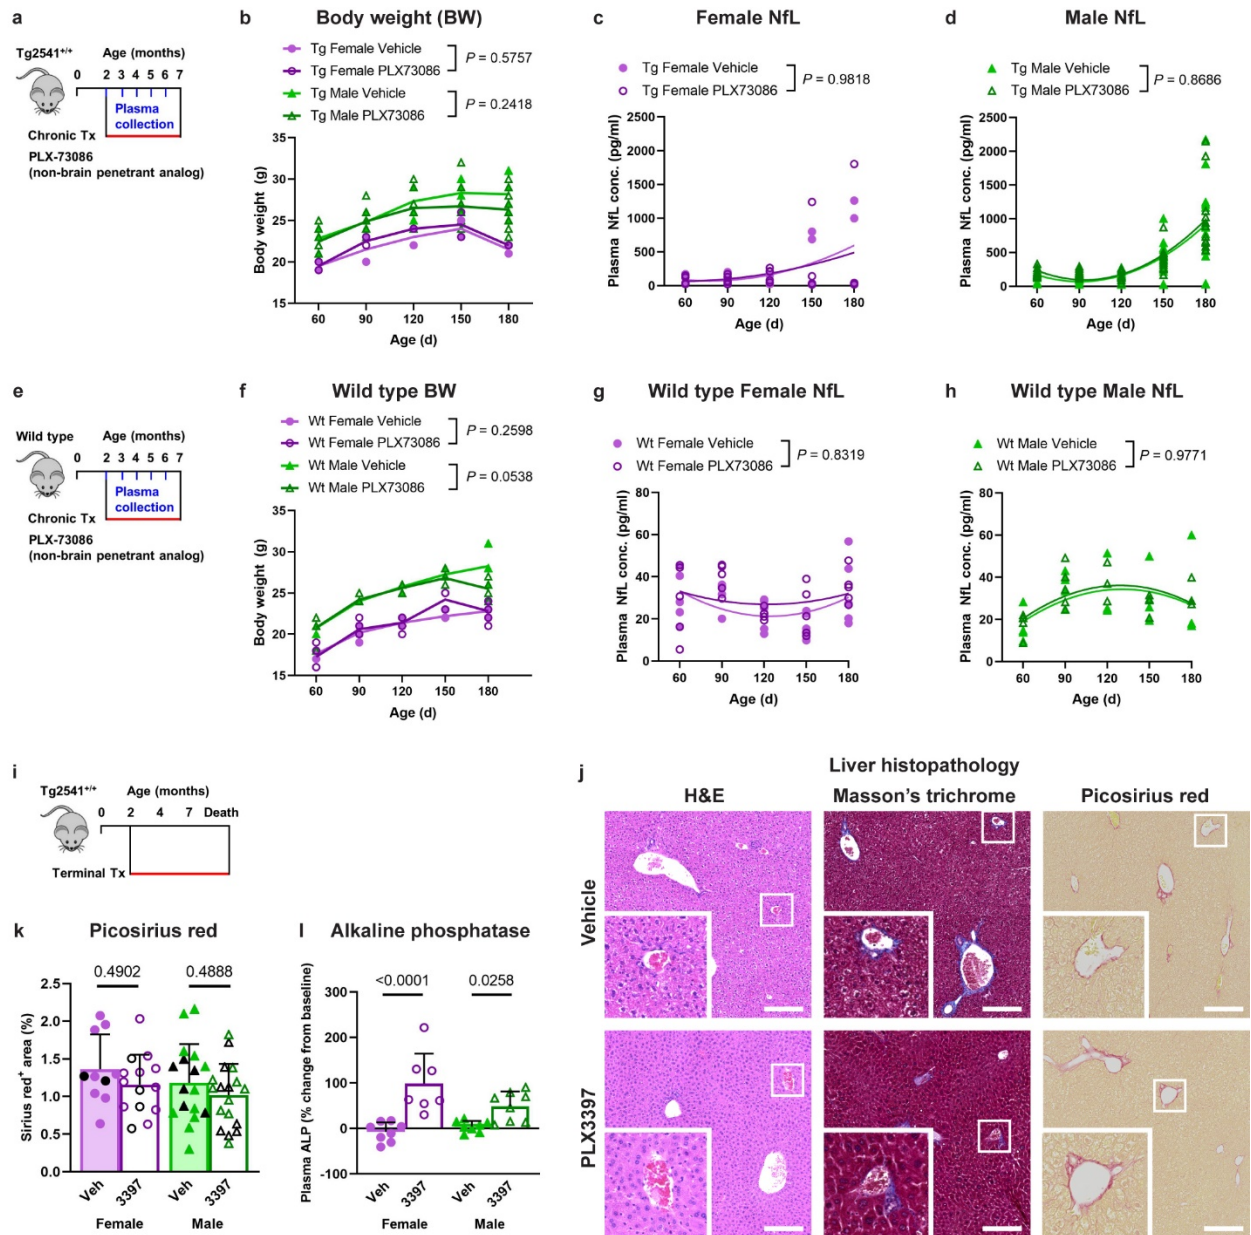

1207

1208 **Fig. 5| Sex-dependent effects of CSF1R are not caused by peripheral toxicity. a,**

1209 Schematic of chronic treatment of Tg2541 mice from 2–7 mo of age with PLX73086 (200 mg/kg

1210 oral), a non-brain penetrant analog of PLX3397 and PLX5622. **b, c,** Plasma concentration of

1211 NfL in female (**b**) or male (**c**) Tg2541 mice treated with vehicle or PLX73086. **d,** Body weights

1212 of female or male T2541 mice treated with PLX73086. **e,** Schematic of chronic treatment of wild

1213 type (Wt) mice from 2–7 mo of age with PLX73086 (200 mg/kg oral). **f, g,** Plasma concentration

1214 of NfL in female (**f**) or male (**g**) Wt mice treated with vehicle or PLX73086. **h,** Body weights of

1215 female or male wild type mice treated with PLX73086. In **b, c, f,** and **g,** the differences between

1216 vehicle or PLX3397 treatment were evaluated by non-linear regression using quadratic models.

1217 Each symbol represents an individual mouse and the best-fit lines and statistical results are  
1218 shown. In **d** and **h**, differences in weight between vehicle and PLX73086 treatment in male or  
1219 female mice were evaluated by two-way repeated measures ANOVA and *P* values are shown.  
1220 Each symbol represents an individual mouse and lines indicate group means. **i**, Schematic of  
1221 terminal treatment of Tg2541 mice from 2 mo of age until death with PLX3397. **j**, Representative  
1222 histopathology images of liver sections of Tg2541 mice receiving terminal treatment with vehicle  
1223 or PLX3397, stained with hematoxylin and eosin (H&E), Masson's trichrome, or Picosirius red.  
1224 High magnification insets are shown of the regions outlined with a white box. Scale bars, 200  
1225  $\mu\text{m}$ . **k**, Sirius red-stained liver sections of Tg2541 mice that received acute or terminal treatment  
1226 with vehicle or PLX3397 were quantified for percent positive area. The acute and terminal  
1227 treatment groups were combined for the analysis due to a limited sample size of terminal  
1228 treatment groups and because the group means were similar for the two treatment paradigms.  
1229 Mice receiving terminal treatment are shown as black symbols and mice receiving acute  
1230 treatment are shown as purple or green symbols. **l**, Alkaline phosphatase (ALP) levels were  
1231 measured at eight months of age in the plasma of Tg2541 mice receiving midbrain inoculation  
1232 of diluent at 2.5 mo of age and then treated with vehicle or PLX3397 until death. The data are  
1233 presented as a percent change from ALP levels at two months of age in the same mice. In **k**  
1234 and **l**, the differences between vehicle and PLX3397 treatment were evaluated by ANOVA with  
1235 Holm-Šidák post hoc analysis and *P* values are shown. Each symbol represents an individual  
1236 mouse and error bars indicate the s.d. of the mean.



1249 expression patterns in PLS dimensions relative to the wild type vehicle group. Mann-Whitney  
1250 test was used for statistical comparison. **e**, Population vector angles of gene expression  
1251 patterns in PLS dimensions from different treatment groups. **f**, Example plots of measured brain  
1252 PLX concentration against mRNA counts for a PLX-modulated gene (*FOS*) and a sex-  
1253 modulated gene (*UTY*). Linear regression and Pearson's correlation analysis were performed  
1254 and the results are shown. N/A indicates that there was no detectable expression of the *UTY*  
1255 gene in female mice. See Supplementary Data File 2 for statistical comparisons between male  
1256 and female PLX-treated mice of all genes. **g**, Variable importance in projection (VIP) scores in a  
1257 PLS regression using non-microglial gene expression patterns to brain PLX concentration and  
1258 sex. Genes with VIP scores above 2 are labeled. Red fonts indicate a subset that belongs to  
1259 immediate early genes (IEGs). **h**, Scatter plot of measured vs. projected brain PLX  
1260 concentration, which was based on a PLS regression with IEG expression. **i**, Correlation of  
1261 brain PLX concentration and the population vector distances between PLX-treated individual  
1262 mouse transcriptome pattern to WT, with and without the IEGs (1,599 and 1,543 genes for each  
1263 mouse, respectively). Linear regressions were calculated for each group. **j**, Quantification of  
1264 normalized expression levels from all IEGs (56 genes for each mouse) in the forebrain. Mann-  
1265 Whitney tests were used for comparing between groups. In **c**, **f**, and **h-j**, each symbol  
1266 represents an individual mouse.

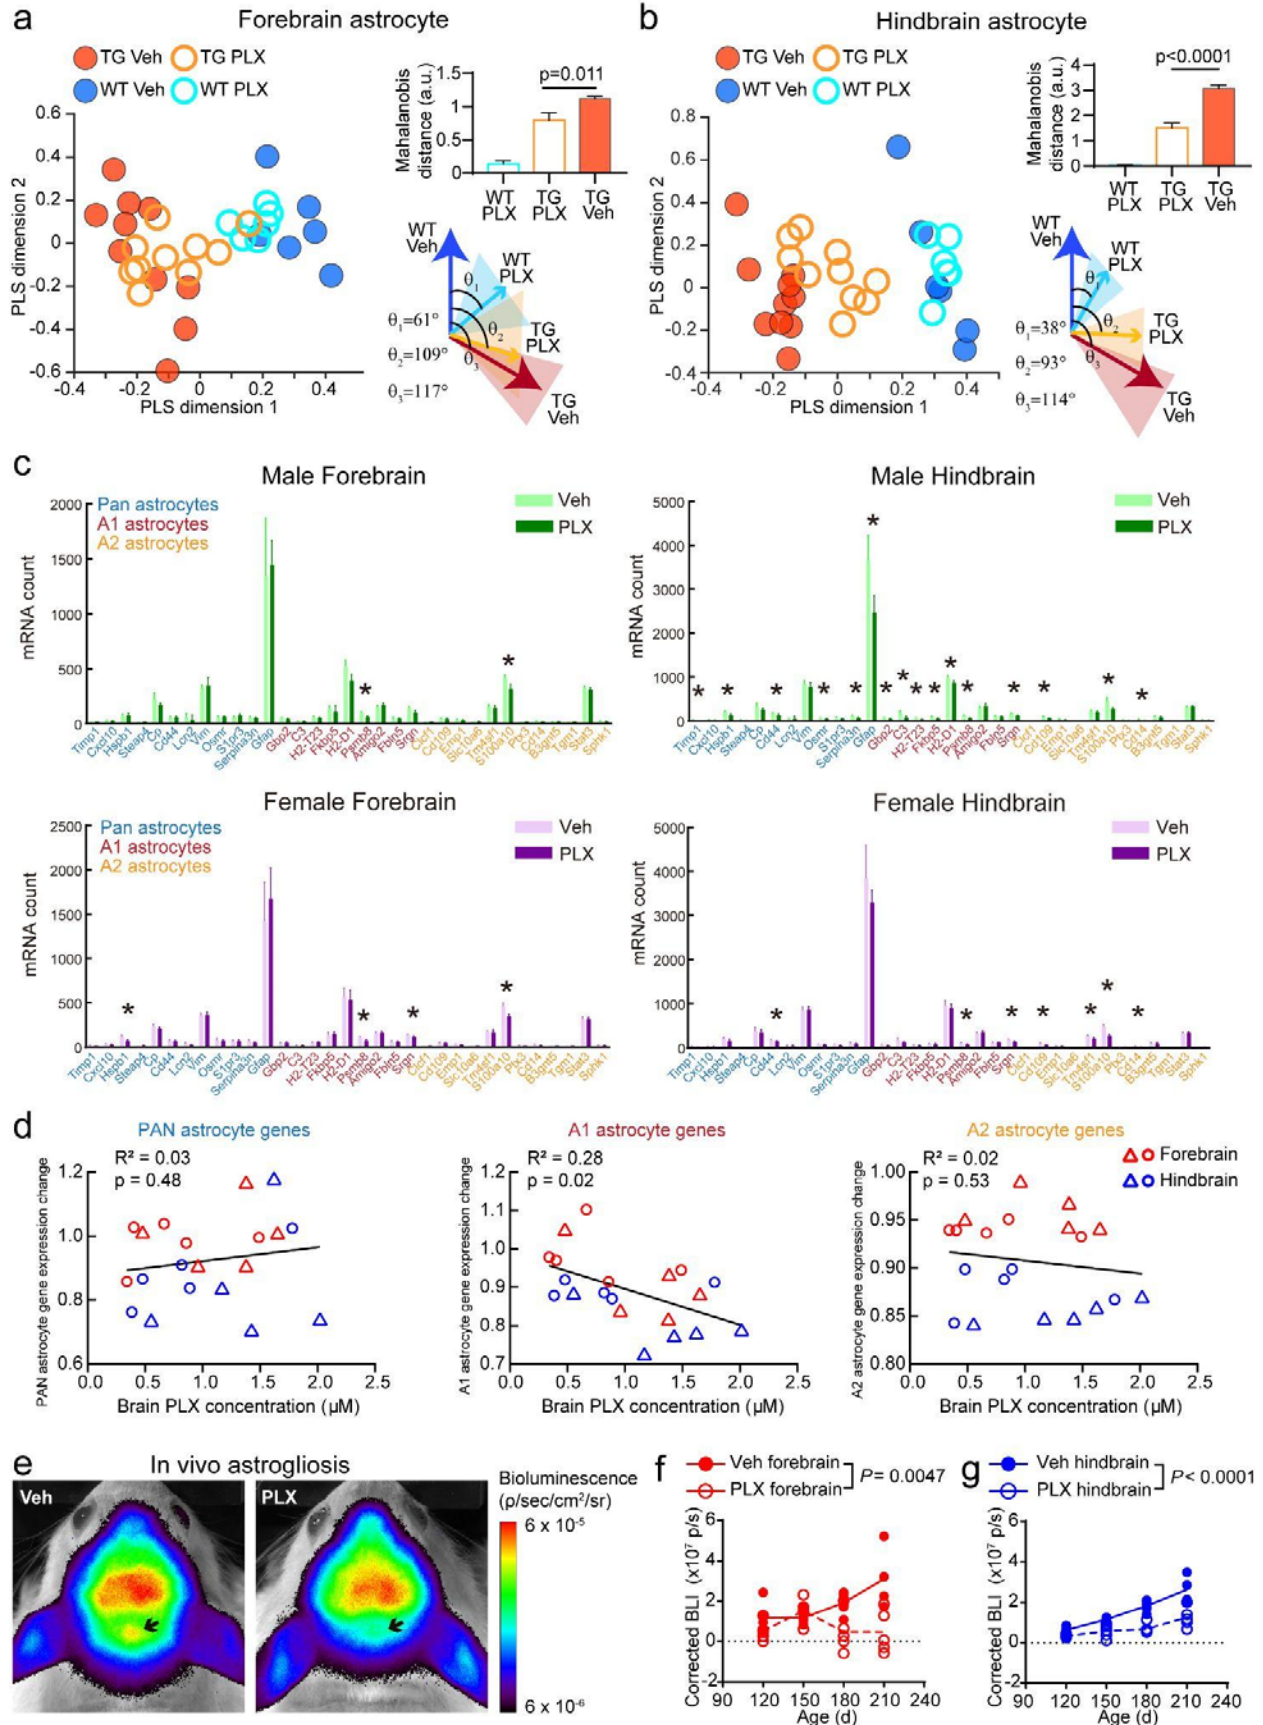

1268 **Fig. 7| CSF1R inhibition ameliorates tau-induced pathological astrocyte activation. a, b,**  
1269 Analyses similar to Fig. 6c–e using astrocyte-specific genes (47 genes in each mouse) in (a)  
1270 forebrain and (b) hindbrain regions. For other cell types and brain regions, see Supplementary  
1271 Fig. 12. **c,** Quantifications of featured astrocyte genes in different conditions. Data are  
1272 represented as mean  $\pm$  S.D. T-tests were used to compare vehicle and PLX-treated groups for  
1273 each gene, with 5% false discovery rate correction for multiple comparisons. **d,** Correlation of  
1274 brain PLX concentration and different groups of astrocyte gene expression. Based on a prior  
1275 study<sup>45</sup>, A1 genes are associated with neurotoxic astrocytes following lipopolysaccharide  
1276 exposure and A2 genes are associated with neuroprotective function in an artery occlusion  
1277 model. Linear regressions were calculated for each group. **e,** Representative images of *in vivo*  
1278 bioluminescence imaging of GFAP activity in Tg2541 mice with vehicle or PLX3397 treatment.  
1279 Arrows indicate hindbrain regions. **f, g,** Quantifications of longitudinal measurements of  
1280 astrogliosis-driven bioluminescence in the (f) forebrains or (g) hindbrains of Tg2541 mice with  
1281 vehicle or PLX3397 treatment. Differences in BLI signal between vehicle and PLX treatment  
1282 were evaluated by mixed-effects analysis (Restricted maximum likelihood). In **a, b, d, f,** and **g,**  
1283 each symbol represents an individual mouse.

1284



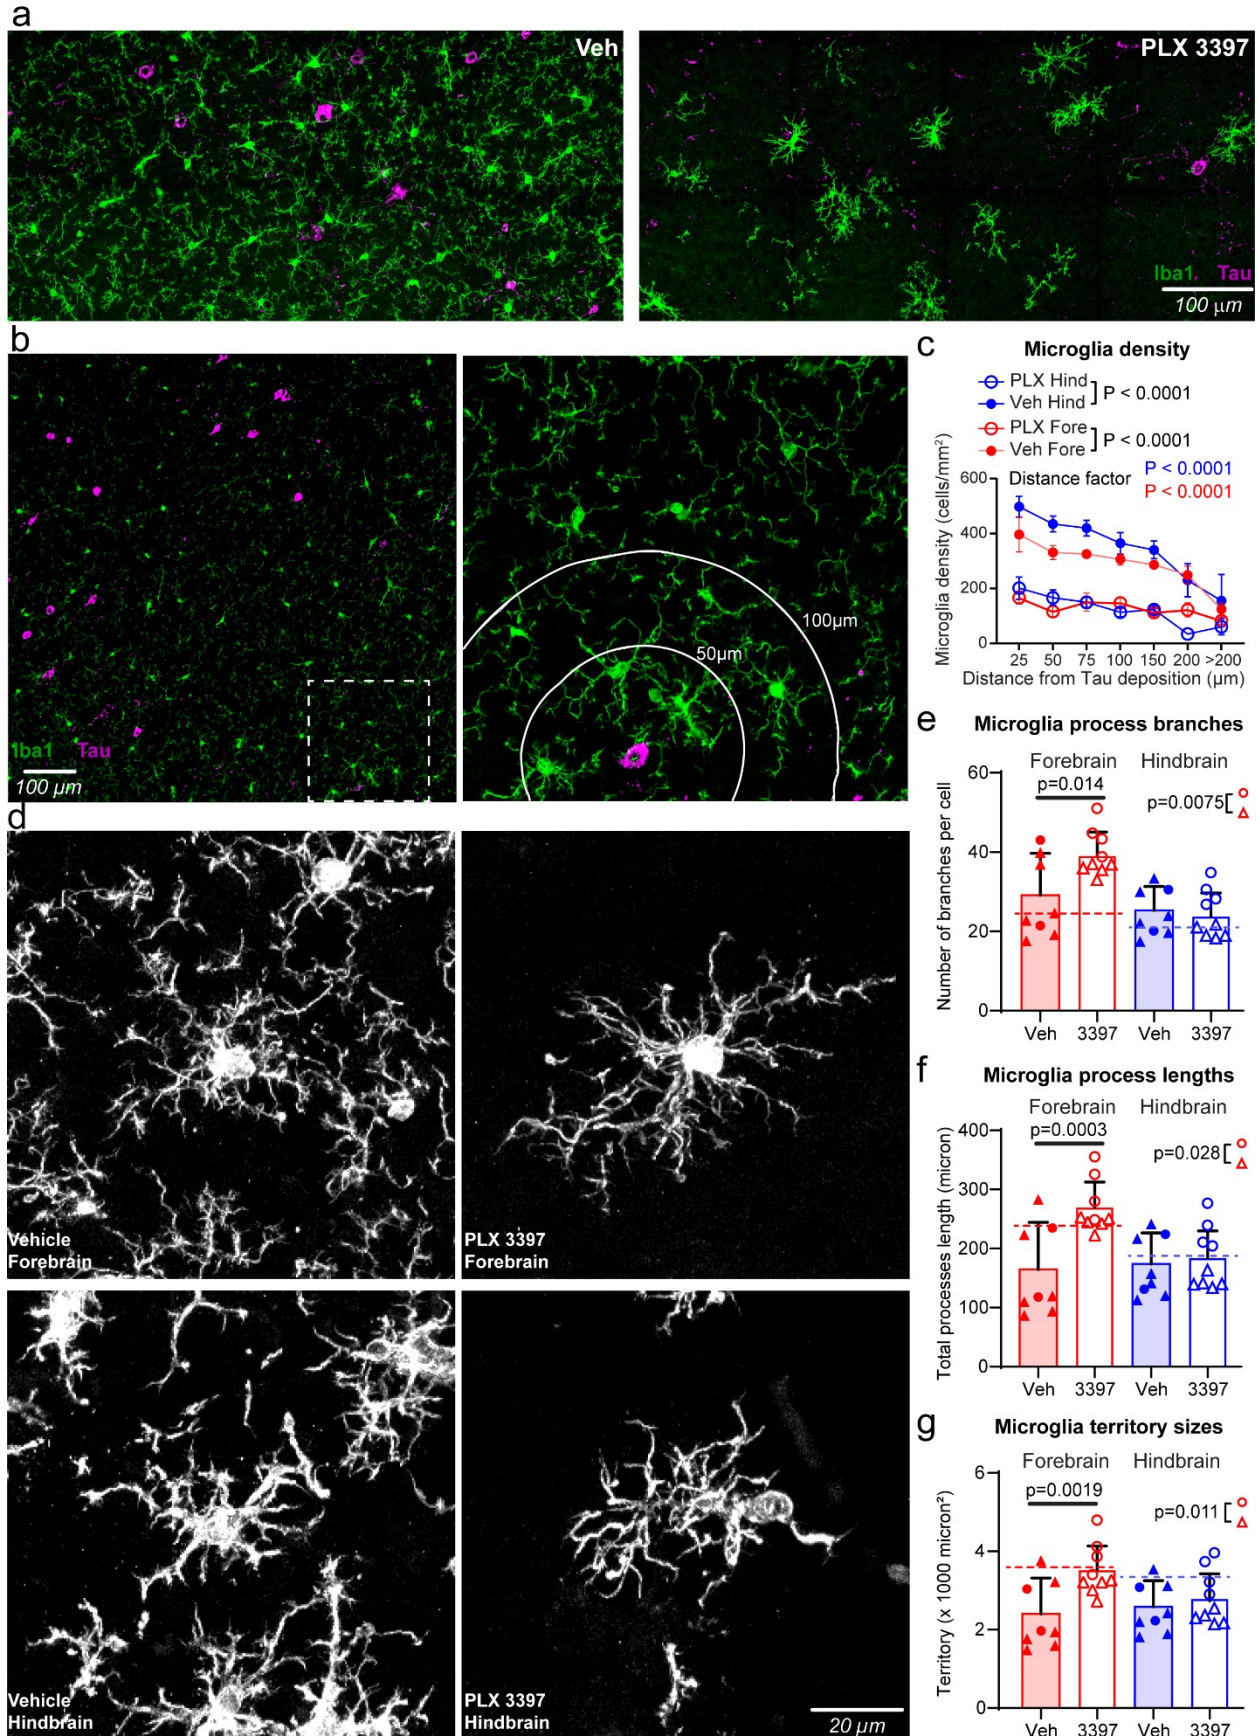

1286 **Fig. 8| PLX3397 treatment preferentially eliminates reactive microglia around tau**  
1287 **deposits. a**, Representative confocal images of immunostaining of tau protein (magenta) and  
1288 microglia (Iba1, green) in the brain of a vehicle-treated (left) or PLX3397-treated (right) 210-d-  
1289 old Tg2541 mouse. **b**, Representative confocal images, similar to panel **a**, of a vehicle-treated  
1290 210-d-old Tg2541 mouse. The right panel shows the zoomed image from the dashed box in the  
1291 left panel. The white lines in the right panel show distances from the tau deposit at the center. **c**,  
1292 Quantification of microglial densities at different distances from the nearest tau deposit in  
1293 Tg2541 mice treated with vehicle or PLX3397 (275 mg/kg oral). Two-way ANOVA was used to  
1294 compare statistical differences between treatment groups and distance bins. **d**, Representative  
1295 confocal images of microglial processes labeled by Iba1 immunohistochemistry. **e-g**,  
1296 Quantification of microglial processes branch numbers (**e**), total lengths (**f**) and territory sizes (**g**)  
1297 in Tg2541 mice treated with vehicle or PLX3397. Each data point shows the average value of  
1298 the microglia measured in an individual mouse. Error bars represent the s.d. of the mean.  
1299 Circles indicate female mice and triangles indicate male mice. Dotted lines show the average  
1300 measurements from microglia in wild type mice. Mann-Whitney tests were used to compare  
1301 between groups. The forebrain regions of PLX3397-treated male and female mice were also  
1302 compared directly and the *P* values are shown on each plot.

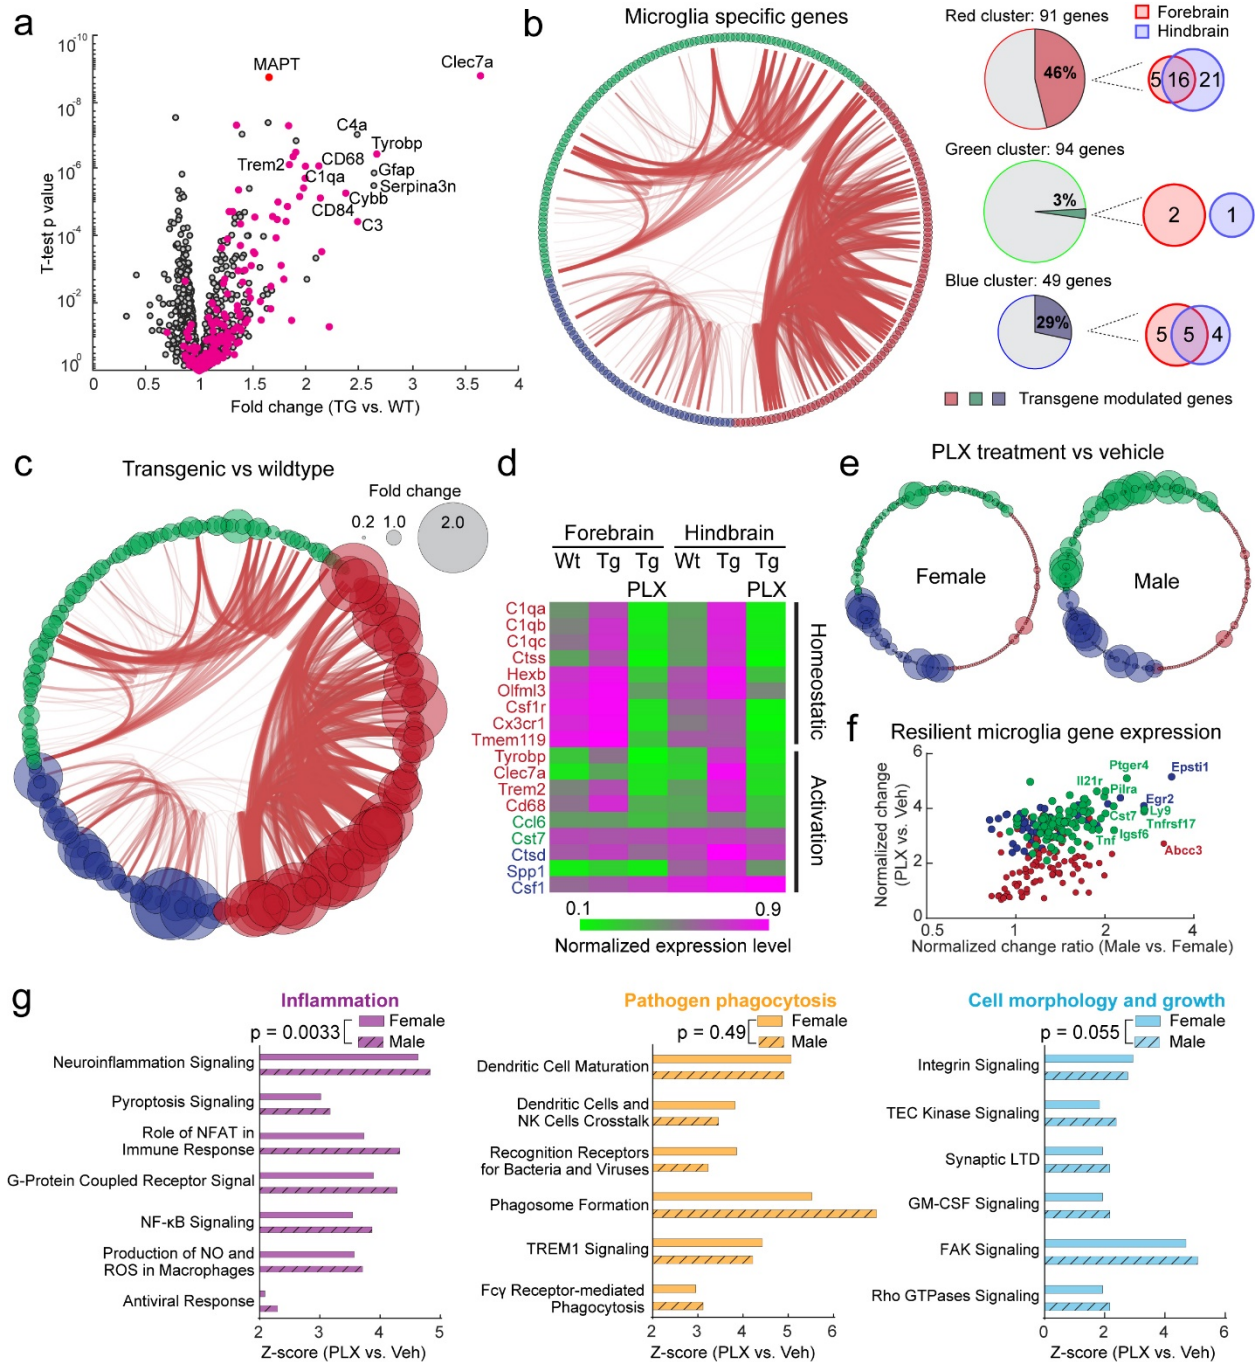

1303

1304 **Fig. 9| Selective ablation of tau-activated microglia gene expression by PLX5622. a,**  
 1305 Volcano plot of gene expression changes between Tg2541 and wild type mice. Many microglial-  
 1306 specific genes (magenta dots) show trends of up-regulation in Tg2541 mice. **b,** Microglial-  
 1307 specific genes (242 genes in our dataset) are clustered into three groups: red, green and blue.  
 1308 Connecting arcs between genes represent the degree of correlation. The pie charts on the right  
 1309 show the percentage of genes in each group that are differentially expressed in Tg2541 and

1310 wild type mice, and the Venn diagrams indicate the brain regions of differential expression. **c**,  
1311 Schemaball graphs of microglial-specific genes comparing Tg2541 to wild type. Individual circle  
1312 sizes indicate fold changes. **d**, Heatmap showing expression level changes in DAM genes<sup>50</sup>.  
1313 Gene names are color coded to show their group assignments. **e**, Schemaball graphs of  
1314 microglial-specific genes comparing Tg2541 vehicle to PLX5622 treatment (1200 mg/kg oral) in  
1315 male and female mice. **f**, Estimated gene expression levels in resilient microglia comparing  
1316 between genders and treatment. Each dot represents a different gene, and is color-coded  
1317 according to the cluster to which it belongs. **g**, Ingenuity Pathway Analysis of the gene  
1318 expression patterns in the resilient microglia in male and female mice. Paired t-tests were used  
1319 in each category to compare sexes.

1320 SUPPLEMENTARY INFORMATION

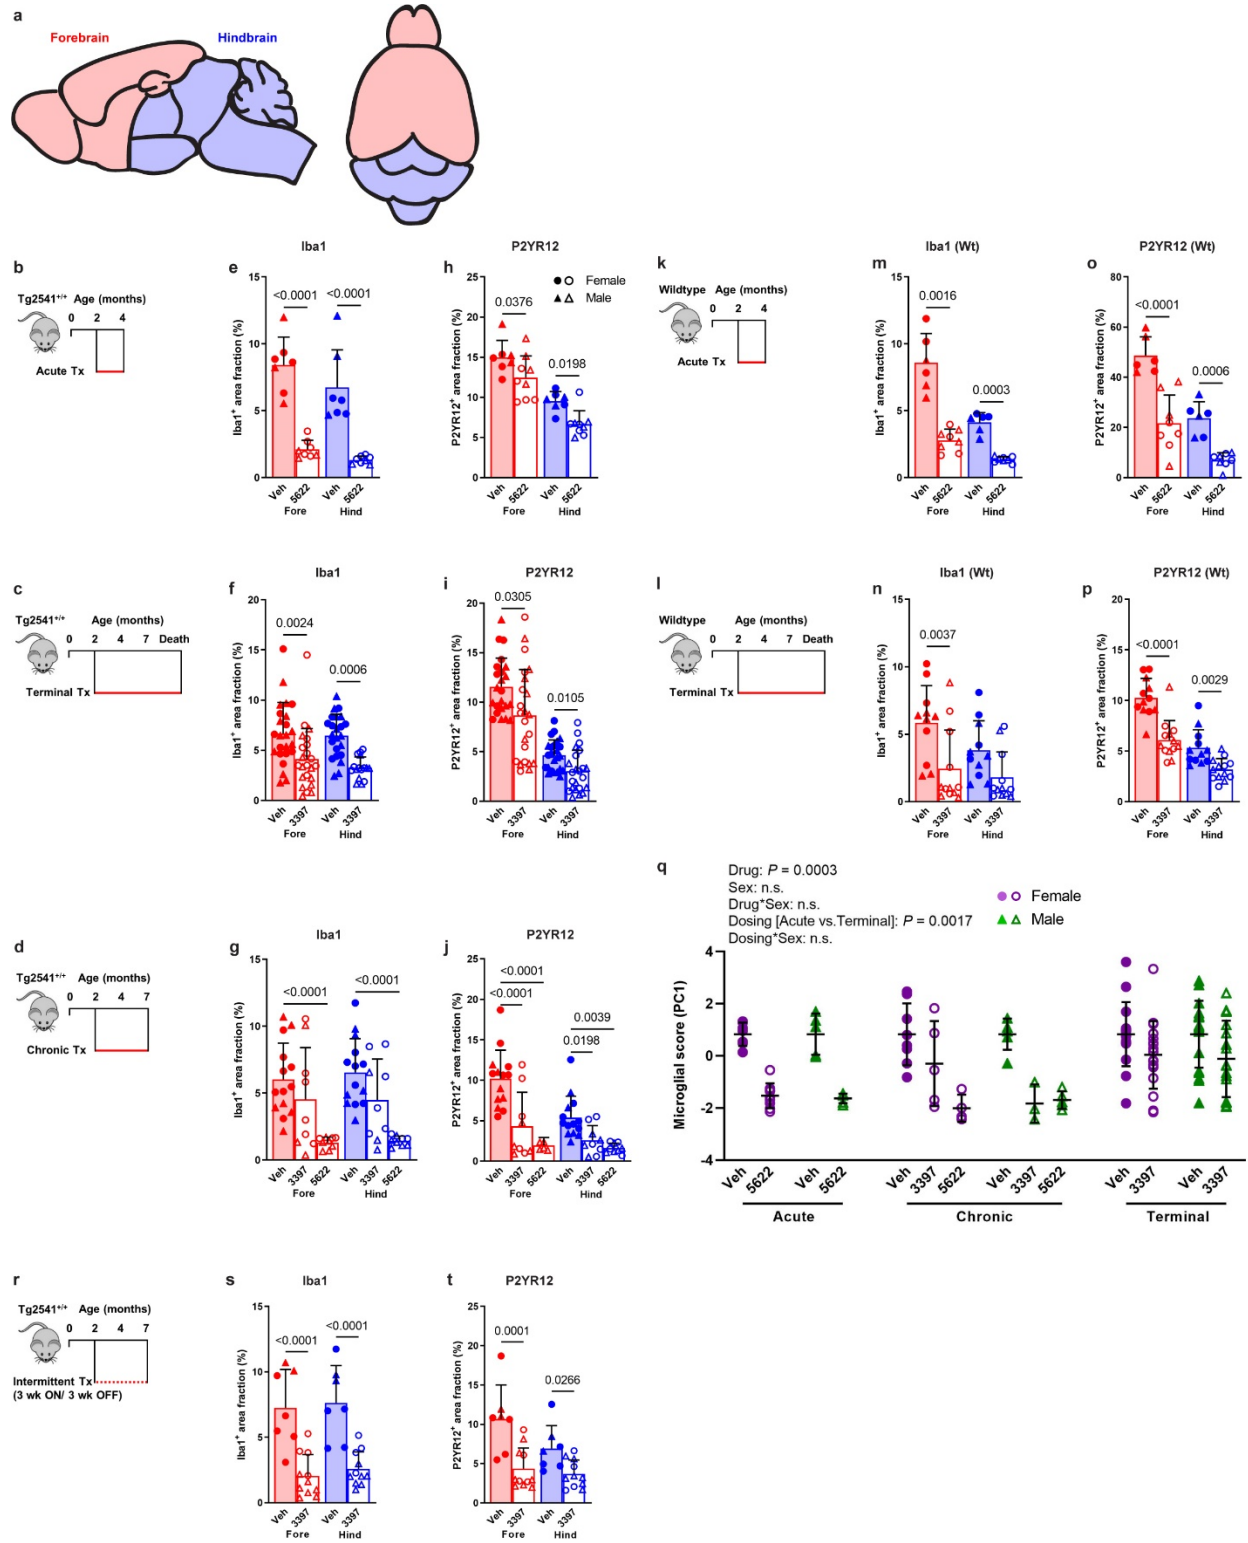

1321

1322 Supplementary Fig. 1| Microglial depletion by CSF1R inhibitors in Tg2541 and wild type

1323 **mice. a**, Sagittal and superior diagrams of the mouse brain divided into two regions: the  
1324 forebrain, containing the cortex, hippocampus, striatum, and olfactory bulb; and the hindbrain,  
1325 containing the thalamus, hypothalamus, midbrain, cerebellum, and brain stem. **b–d**, Schematics  
1326 of acute (**b**), terminal (**c**), or chronic (**d**) PLX treatment of Tg2541 mice from 2–4 mo of age, 2  
1327 mo of age until death, or 2–7 mo of age, respectively. **e–g**, Quantification of the Iba1-positive  
1328 area fraction by IHC in the forebrains or hindbrains of Tg2541 mice receiving acute (**e**), terminal  
1329 (**f**), or chronic (**g**) treatment with vehicle, PLX3397 (275 mg/kg oral), or PLX5622 (1200 mg/kg  
1330 oral). **h–j**, Quantification of the P2YR12-positive area fraction by IHC in the forebrains or  
1331 hindbrains of Tg2541 mice receiving acute (**h**), terminal (**i**), or chronic (**j**) treatment with vehicle,  
1332 PLX3397, or PLX5622. **k, l**, Schematics of acute (**k**) or terminal (**l**) PLX treatment of C57BL/6J  
1333 wild type mice (Wt) from 2–4 mo of age, or 2 mo of age until death, respectively. **m, n**,  
1334 Quantification of the Iba1-positive area fraction by IHC in the forebrain and hindbrain of Wt mice  
1335 receiving acute (**m**) or terminal (**n**) treatment with vehicle, PLX3397, or PLX5622. **o, p**,  
1336 Quantification of the P2YR12-positive area fraction by IHC in the forebrains or hindbrains of Wt  
1337 mice receiving acute (**o**) or terminal (**p**) treatment with vehicle, PLX3397, or PLX5622. *P* values  
1338 for all statistically significant differences ( $P < 0.05$ ) are shown. **q**, Principal component analysis  
1339 was performed, using all data presented in **e–j** and **m–p** to calculate a ‘microglial score’ that  
1340 represents the amount of Iba1 and P2YR12 staining in both the forebrains and hindbrains of  
1341 Tg2541 and Wt mice. All data was first standardized to the respective vehicle-treated group of  
1342 the same sex and same dosing paradigm. Then, two principal components (PC1 and PC2) were  
1343 identified which accounted for 79.0% of the total variance in the data. Multiple linear regression  
1344 was performed on PC1 of the drug-treated groups to evaluate the main effects sex and dosing  
1345 paradigm, and the dosing\*sex interaction effect. Multiple linear regression was performed on all  
1346 groups to determine the main effect of drug and the drug\*sex interaction effect. *P* values for all  
1347 statistically significant differences ( $P < 0.05$ ) are shown. n.s. indicates not statistically significant.  
1348 PC2 was also evaluated, but only the drug main effect was statistically significant. **r**, Schematic  
1349 of intermittent PLX treatment of Tg2541 mice from 2–7 mo of age, with three weeks on  
1350 treatment followed by three weeks off of treatment. **s, t**, Quantification of the Iba1-positive (**s**) or  
1351 P2YR12-positive (**t**) area fractions by IHC in the forebrains or hindbrains of Tg2541 mice  
1352 receiving intermittent treatment with vehicle or PLX3397. In **e–j**, **m–p**, **s**, and **t**, each symbol  
1353 represents the forebrain or hindbrain of an individual mouse, with female mice shown as closed  
1354 or open circles and male mice shown as closed or open triangles. Error bars represent s.d. of  
1355 the mean. Two-way ANOVA with Holm-Šidák post hoc testing was used in **e, f, h, i, m–p, s**, and  
1356 **t**. Welch ANOVA with Dunnett T3 post hoc testing was used in **g** and **j**.

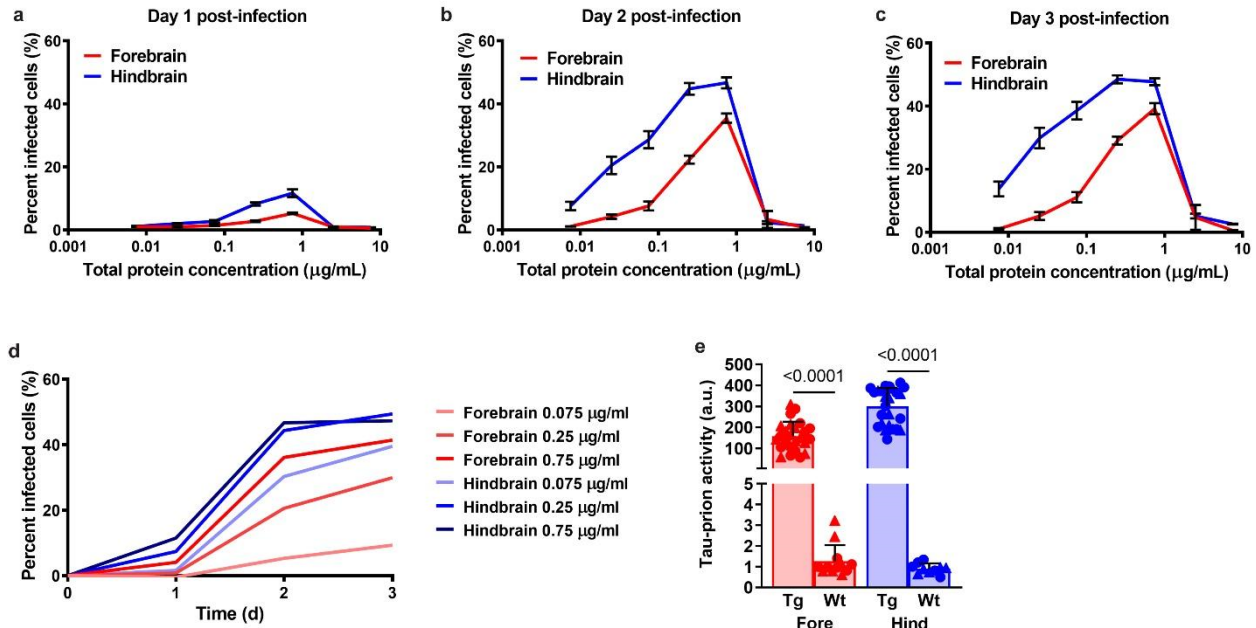

1357

1358 **Supplementary Fig. 2| Optimization of HEK293T cell bioassay for measuring tau-prions in**

1359 **Tg2541 mouse brain homogenates.** **a–c**, Percent of HEK293T cells expressing YFP-tau-

1360 RD\*P301L/V337M with tau aggregates at one (**a**), two (**b**), or three (**c**) days post-infection with

1361 Tg2541 mouse forebrain or hindbrain homogenates at concentrations ranging from 0.0075–7.5

1362 µg/ml. Error bars represent s.e.m. of three terminal Tg2541 mice. **d**, Percent of cells infected

1363 with tau aggregates over time following infection with 0.075, 0.25, or 0.75 µg/ml Tg2541 mouse

1364 forebrain or hindbrain homogenates. Lines represent the means of three terminal Tg2541 mice.

1365 **e**, Tau-prion levels in 0.25 µg/ml forebrain or hindbrain homogenates of Tg2541 (Tg) or wild

1366 type (Wt) mice, measured using the optimized HEK293T cell tau-prion bioassay. Each symbol

1367 represents the forebrain or hindbrain of an individual mouse and female mice are shown as

1368 closed circles while male mice are shown as closed triangles. Two-way ANOVA with Holm-

1369 Šidák post hoc testing was used and *P* values for all statistically significant differences (*P* <

1370 0.05) are shown.

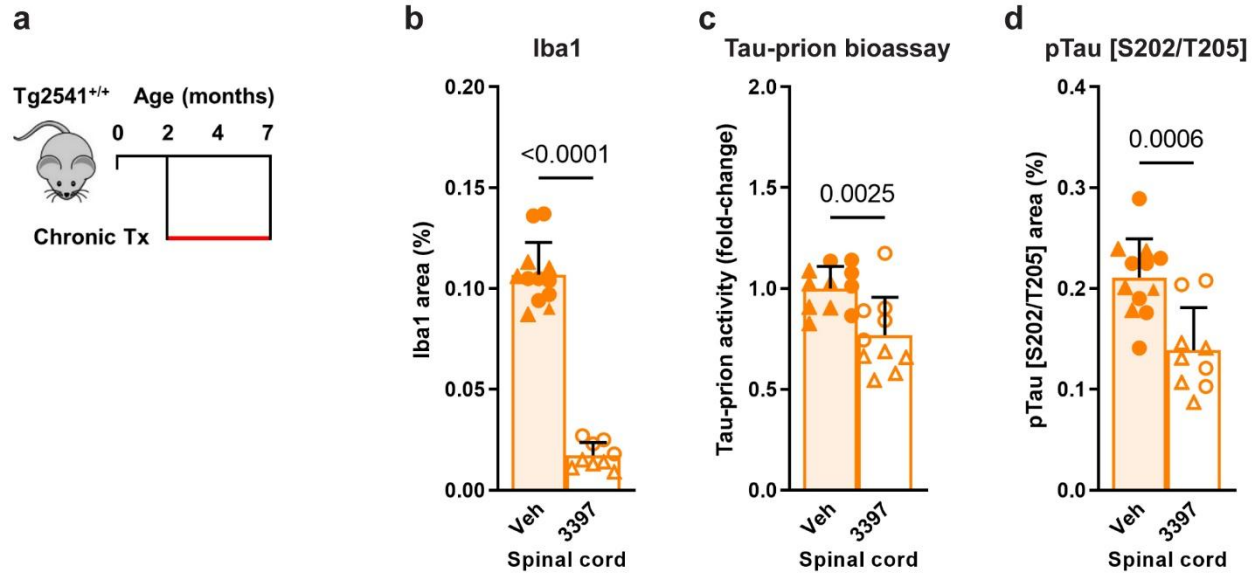

1371

1372 **Supplementary Fig. 3| CSF1R inhibition reduces microglia and pathogenic tau levels in**  
1373 **the spinal cords of Tg2541 mice. a**, Schematic of chronic PLX treatment of Tg2541 mice from  
1374 2–7 mo of age. **b**, Quantification of the Iba1-positive area fraction by IHC in the spinal cords of  
1375 Tg2541 mice receiving chronic treatment with vehicle or PLX3397 (275 mg/kg oral). **c**, Tau-  
1376 prion levels in spinal cord tissue homogenates of Tg2541 mice receiving chronic treatment with  
1377 vehicle or PLX3397, measured using the HEK293T cell tau-prion bioassay and normalized to  
1378 the vehicle group. **d**, Quantification of pTau [S202/T205]-positive area by IHC in the spinal cords  
1379 of Tg2541 mice receiving chronic treatment with vehicle or PLX3397. In **b–d**, each symbol  
1380 represents an individual mouse, with female mice shown as closed or open circles and male  
1381 mice shown as closed or open triangles. Error bars represent s.d. of the mean. Unpaired t tests  
1382 were used and *P* values for all statistically significant differences ( $P < 0.05$ ) are shown.



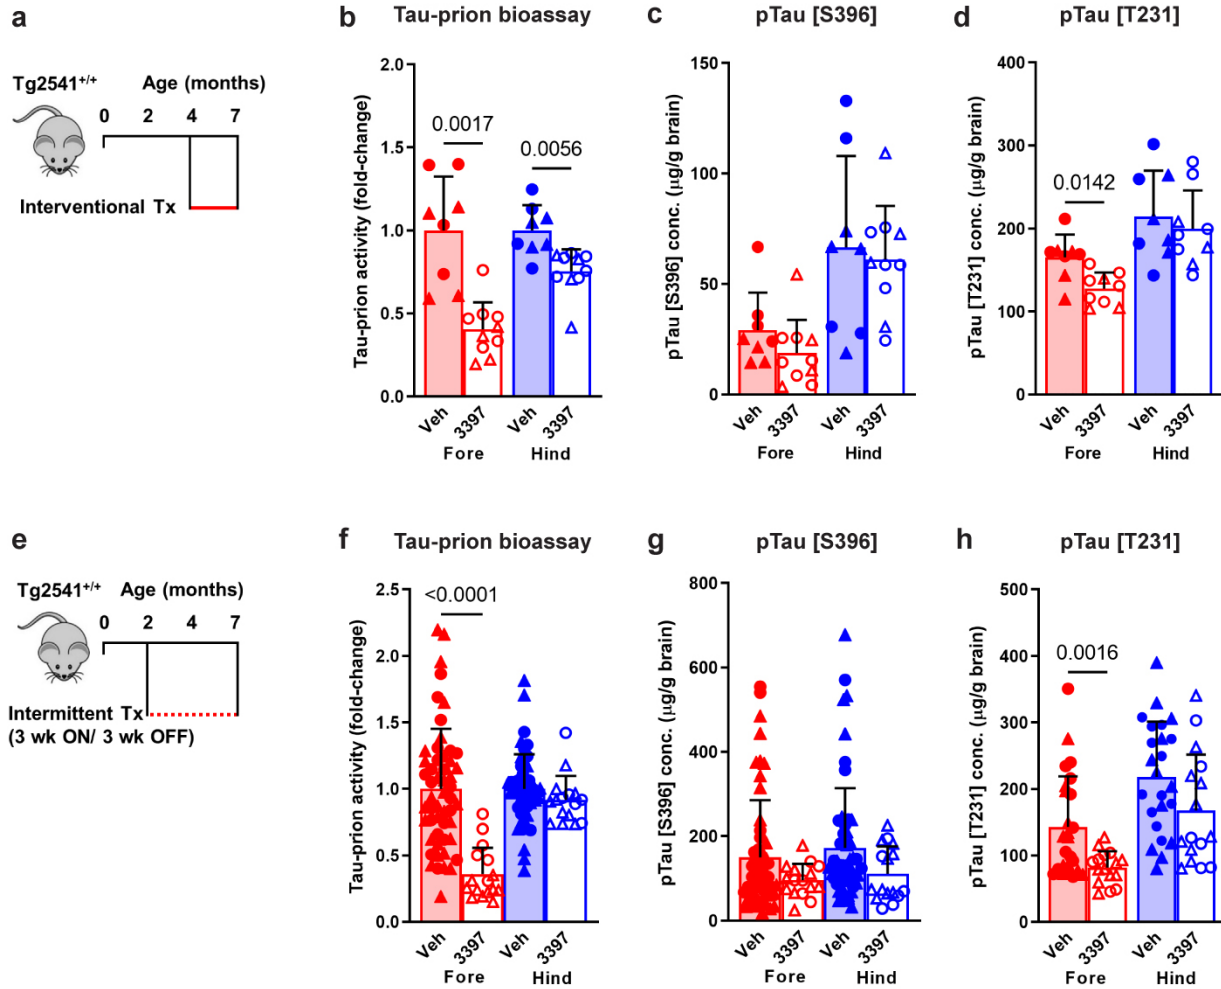

1383

1384 **Supplementary Fig. 4| Interventional or intermittent CSF1R inhibition reduces pathogenic**

1385 **tau levels in the brains of Tg2541 mice.** **a**, Schematic of interventional PLX treatment of

1386 Tg2541 mice from 4–7 mo of age. **b**, Tau-prion levels in forebrain and hindbrain tissue

1387 homogenates of Tg2541 mice receiving interventional treatment with vehicle or PLX3397 (275

1388 mg/kg oral), measured using the HEK293T cell tau-prion bioassay and normalized to the vehicle

1389 group. **c**, Levels of pTau [S396] measured by ELISA in formic acid extracts of forebrain and

1390 hindbrain tissue homogenates of Tg2541 mice receiving interventional treatment with vehicle or

1391 PLX3397, normalized to total protein concentration. **d**, Levels of pTau [T231] measured by

1392 ELISA in formic acid extracts of forebrain and hindbrain tissue homogenates of Tg2541 mice

1393 receiving interventional treatment with vehicle or PLX3397, normalized to total protein

1394 concentration. **e**, Schematic of intermittent PLX treatment of Tg2541 mice from 2–7 mo of age,

1395 with three weeks on treatment followed by three weeks off of treatment.

1396 **f**, Tau-prion levels in forebrain and hindbrain tissue homogenates of Tg2541 mice receiving intermittent treatment

1397 with vehicle or PLX3397, measured using the HEK293T cell tau-prion bioassay and normalized  
1398 to the vehicle group. **g**, Levels of pTau [S396] measured by ELISA in formic acid extracts of  
1399 forebrain and hindbrain tissue homogenates of Tg2541 mice receiving intermittent treatment  
1400 with vehicle or PLX3397, normalized to total protein concentration. **h**, Levels of pTau [T231]  
1401 measured by ELISA in formic acid extracts of forebrain and hindbrain tissue homogenates of  
1402 Tg2541 mice receiving intermittent treatment with vehicle or PLX3397, normalized to total  
1403 protein concentration. In **b–d** and **f–h**, each symbol represents the forebrain or hindbrain of an  
1404 individual mouse, with female mice shown as closed or open circles and male mice shown as  
1405 closed or open triangles. Error bars represent s.d. of the mean. Two-way ANOVA with Holm-  
1406 Šidák post hoc testing was used and *P* values for all statistically significant differences (*P* <  
1407 0.05) are shown.

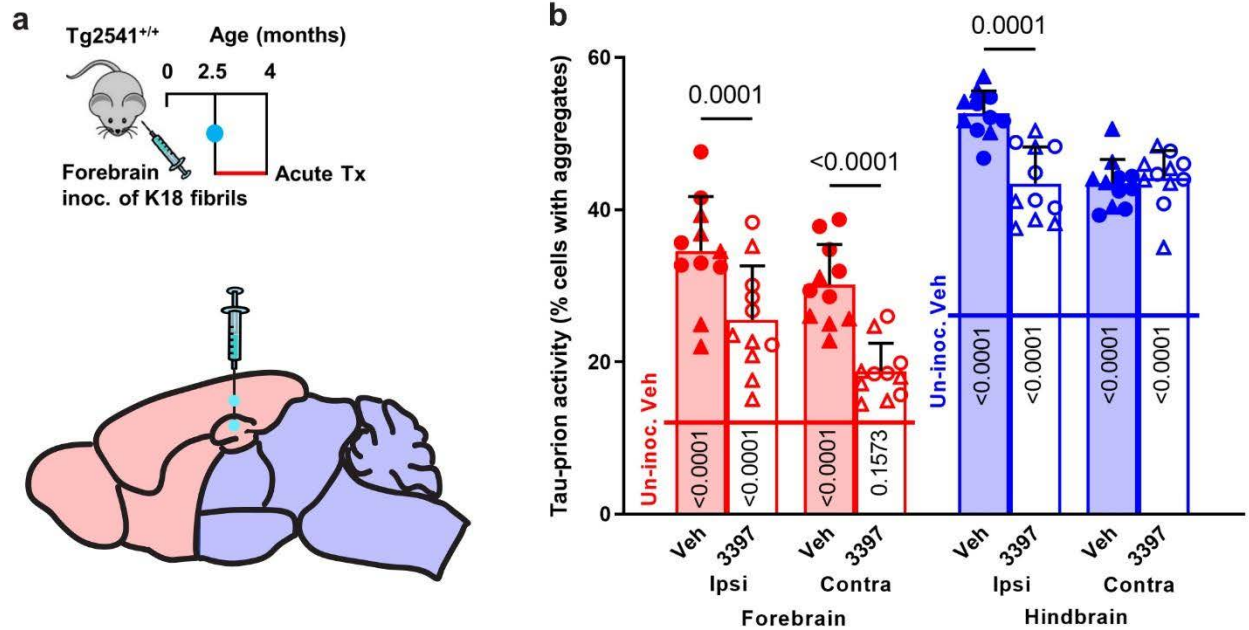

1408

1409 **Supplementary Fig. 5| CSF1R inhibition reduces pathogenic tau spreading following K18**

1410 **forebrain inoculation.** **a**, Schematic of acute PLX treatment of Tg2541 mice from 2.5–4 mo of

1411 age following inoculation of K18 tau fibrils into the hippocampus and overlying cortex (forebrain

1412 regions) at 2.5 mo of age. **b**, Tau-prion levels in the ipsilateral (inoculated side) or contralateral

1413 (un-inoculated side) forebrain or hindbrain tissue homogenates of Tg2541 mice receiving acute

1414 treatment with vehicle or PLX3397 (275 mg/kg oral) following K18 forebrain inoculation,

1415 measured using the HEK293T cell tau-prion bioassay and presented as percent of cells with tau

1416 aggregates. Horizontal lines across bars indicate the mean tau-prion level in forebrain (12.54%

1417 cells with aggregates) or hindbrain (26.06% cells with aggregates) tissue homogenates of

1418 Tg2541 mice that did not undergo K18 inoculation and received acute treatment with vehicle

1419 (Un-inoc. Veh). Each symbol represents the ipsilateral or contralateral forebrain or hindbrain of

1420 an individual mouse, with female mice shown as closed or open circles and male mice shown

1421 as closed or open triangles. Error bars represent s.d. of the mean. Three-way ANOVA with

1422 Holm-Šidák post hoc testing was used and *P* values for all statistically significant differences (*P*

1423 < 0.05) between Veh and 3397 are shown above the bars. *P* values for all differences between

1424 each group and the respective brain region of Un-inoc. Veh mice are shown on the bars.

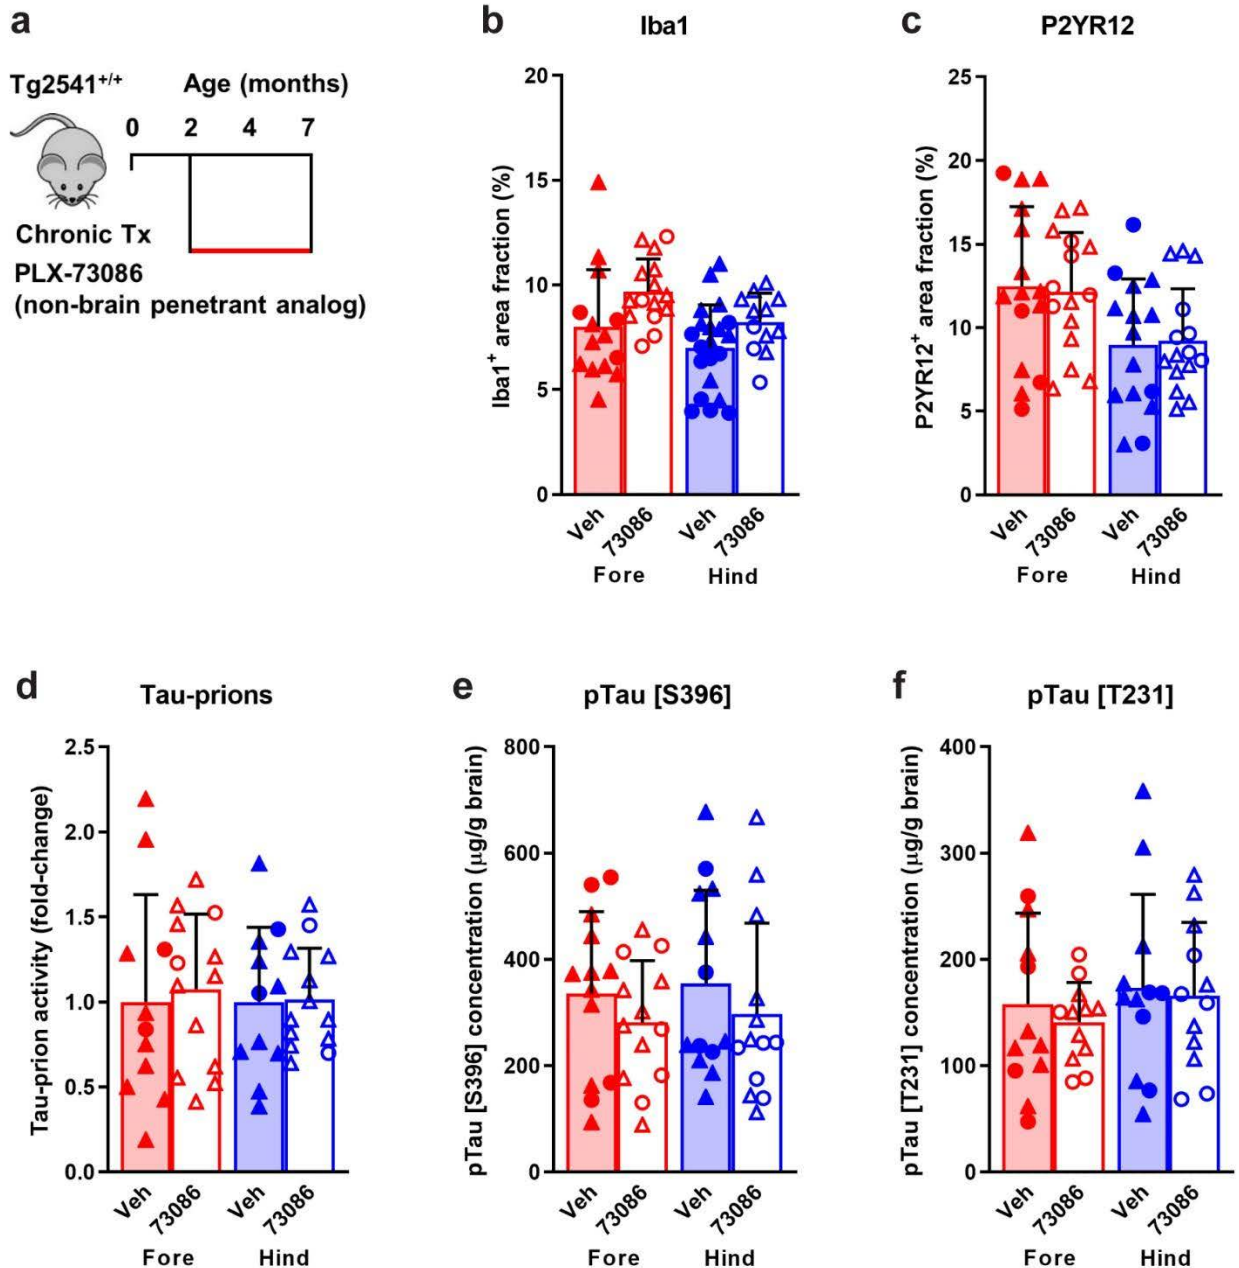

1425

1426 **Supplementary Fig. 6| Non-brain penetrant analog of CSF1R inhibitors does not reduce**  
1427 **microglia or pathogenic tau levels in the brains of Tg2541 mice.** a, Schematic of chronic  
1428 treatment of Tg2541 mice from 2–7 mo of age with PLX73086, a non-brain penetrant analog of  
1429 PLX3397 and PLX5622. b, c, Quantification of the Iba1-positive (b) or P2YR12-positive (c)  
1430 area fractions by IHC in the forebrains or hindbrains of Tg2541 mice receiving chronic treatment with  
1431 vehicle or PLX73086 (200 mg/kg oral). d, Tau-prion levels in forebrain and hindbrain tissue  
1432 homogenates of Tg2541 mice receiving chronic treatment with vehicle or PLX73086, measured

1433 using the HEK293T cell tau-prion bioassay and normalized to the vehicle group. **e, f**, Levels of  
1434 pTau [S396] (**e**) or pTau [T231] (**f**) measured by ELISA in formic acid extracts of forebrain and  
1435 hindbrain tissue homogenates of Tg2541 mice receiving chronic treatment with vehicle or  
1436 PLX73086, normalized to total protein concentration. In **b–f**, each symbol represents the  
1437 forebrain or hindbrain of an individual mouse, with female mice shown as closed or open circles  
1438 and male mice shown as closed or open triangles. Error bars represent s.d. of the mean. Two-  
1439 way ANOVA with Holm-Šidák post hoc testing was used and *P* values for all statistically  
1440 significant differences ( $P < 0.05$ ) are shown.

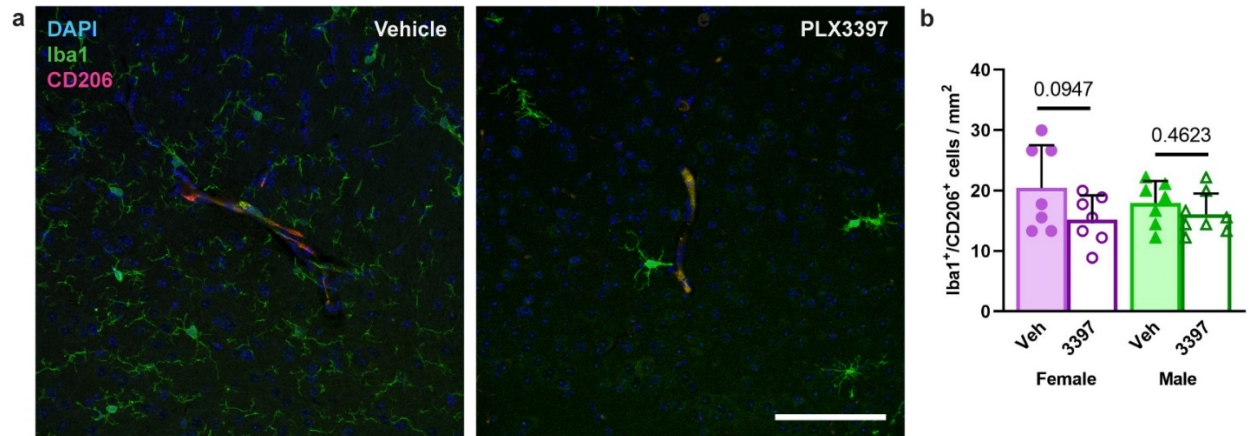

1441

1442 **Supplementary Fig. 7| Pharmacological CSF1R inhibition does not deplete perivascular**

1443 **macrophages.** a, Representative immunofluorescence images of Tg2541 mouse cortical blood

1444 vessels labeled for perivascular macrophages (Iba1+/CD206+) and microglia (Iba1+/CD206-).

1445 Iba1 labels both PVMs and microglia. Mice were treated with PLX3397 from 2.5 mo of age until

1446 death, following inoculation of K18 tau fibrils into the midbrain (hindbrain region) at 2.5 mo of

1447 age. Scale bar, 100  $\mu$ m. b, Quantification of Iba1+/CD206+ cell density in images of Tg2541

1448 mouse cortical blood vessels. Each symbol represents the average of six blood vessel images

1449 from each individual mouse. Error bars represent s.d. of the mean. Two-way ANOVA was used

1450 and the *P* values for Holm-Šidák post hoc testing between treatment groups are shown.

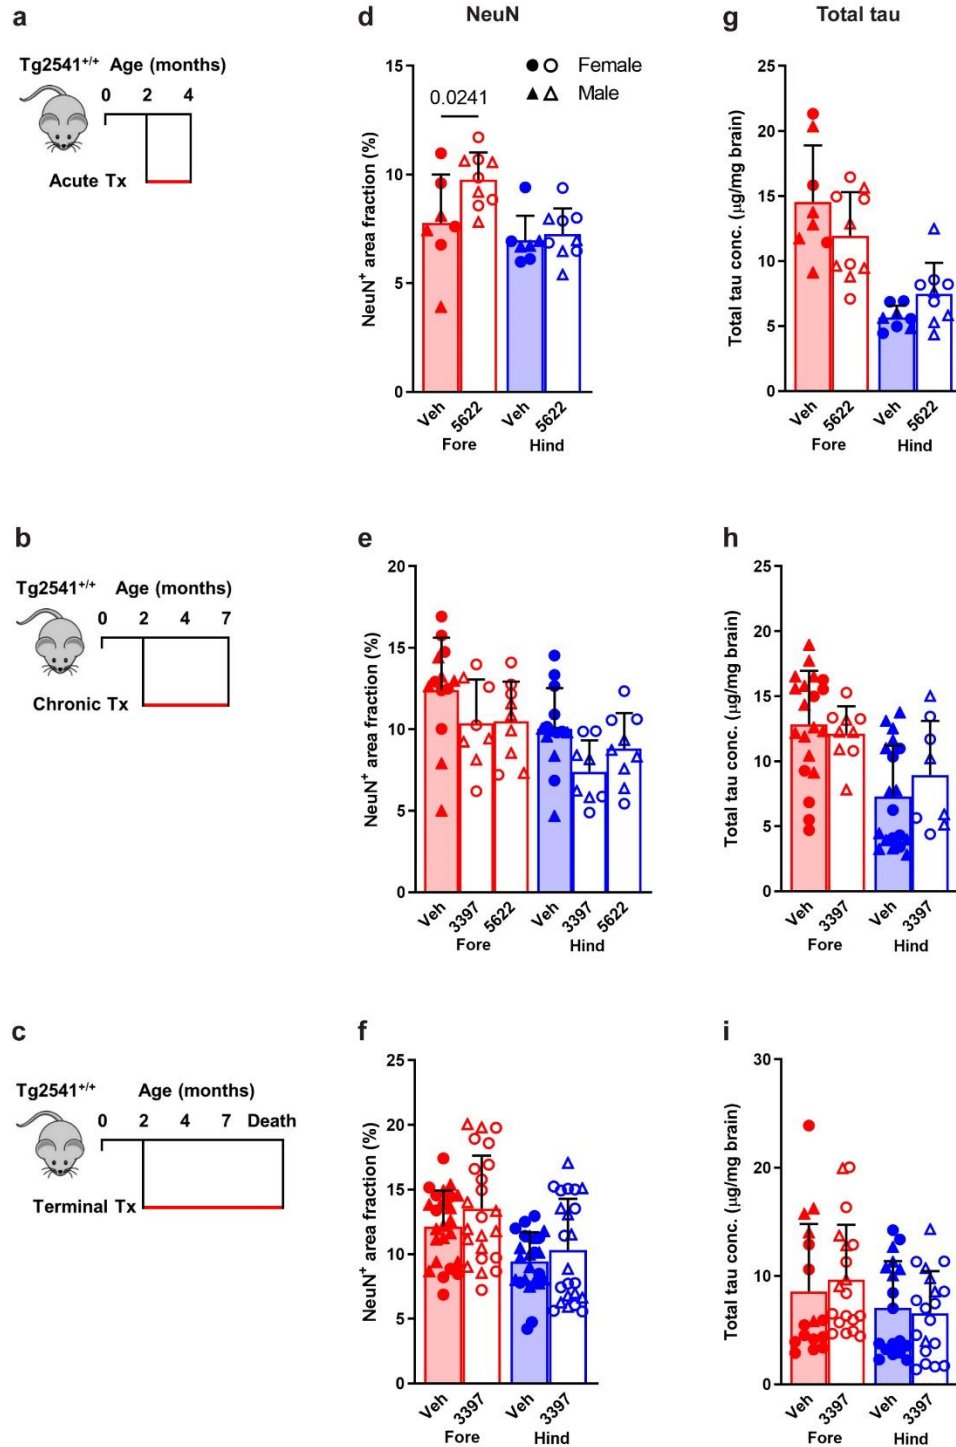

1451

1452 **Supplementary Fig. 8| CSF1R inhibition by three treatment paradigms does not affect**  
 1453 **neurons or total tau levels. a–c**, Schematics of acute (a), chronic (b), or terminal (c) PLX  
 1454 treatment of Tg2541 mice from 2–4 mo of age, 2–7 mo of age, or 2 mo of age until death,  
 1455 respectively. **d–f**, Quantification of neuronal nuclei (NeuN)-positive area fraction by IHC analysis

1456 of forebrain and hindbrain areas of Tg2541 mice receiving acute (**d**), chronic (**e**), or terminal (**f**)  
1457 treatment with vehicle, PLX3397 (275 mg/kg oral), or PLX5622 (1200 mg/kg oral). **g–i**, Levels of  
1458 total tau measured by ELISA in forebrain and hindbrain tissue homogenates of Tg2541 mice  
1459 receiving acute (**g**), chronic (**h**), or terminal treatment (**i**) with vehicle, PLX3397, or PLX5622,  
1460 normalized to total protein concentration. In **d–i**, each symbol represents the forebrain or  
1461 hindbrain of an individual mouse, with female mice shown as closed or open circles and male  
1462 mice shown as closed or open triangles. Error bars represent s.d. of the mean. Two-way  
1463 ANOVA with Holm-Šidák post hoc testing was used in **d**, and **f–i**. One-way ANOVA with Holm-  
1464 Šidák post hoc testing was used in **e**. *P* values for all statistically significant differences (*P* <  
1465 0.05) are shown.



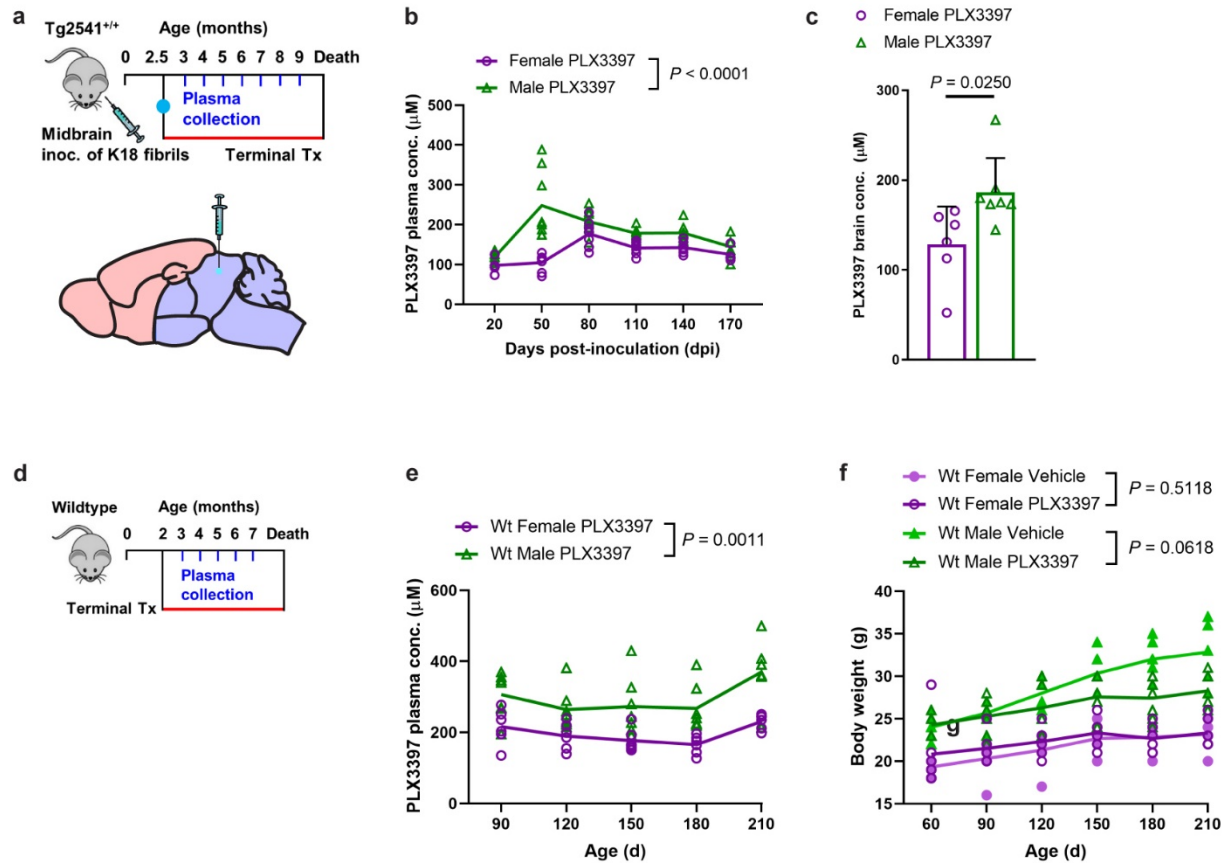

1466

1467 **Supplementary Fig. 9| PLX3397 levels are increased in male Tg2541 and wild type mice.**

1468 **a**, Schematic of terminal PLX3397 treatment of Tg2541 mice from 2.5 mo of age until death,

1469 following inoculation of K18 tau fibrils into the midbrain (hindbrain region) at 2.5 mo of age.

1470 Blood plasma was collected at monthly intervals from 3–9 mo of age. **b**, Plasma concentration

1471 of PLX3397 in female or male Tg2541 mice inoculated with K18 followed by terminal treatment

1472 with PLX3397, plotted over days post inoculation (dpi). Mixed-effects analysis (Restricted

1473 maximum likelihood) was used to compare female and male mice and the  $P$  value is shown. **c**,

1474 Brain concentration of PLX3397 at death in female or male Tg2541 mice inoculated with K18

1475 followed by terminal treatment with PLX3397. Unpaired t test was used to compare female and

1476 male mice and the  $P$  value is shown. Each symbol represents an individual mouse and the error

1477 bars represent the s.d. of the mean. **d**, Schematic of terminal PLX treatment of C57BL/6J wild

1478 type mice (Wt) from 2 mo of age until death and blood plasma collected at 3, 4, 5, 6, and 7 mo

1479 of age. **e**, Plasma concentration of PLX3397 in female or male Wt mice. The difference between

1480 female and male mice was assessed by two-way repeated measures ANOVA and the  $P$  value is

1481 shown. **f**, Body weights of female or male Wt mice treated with vehicle or PLX3397. Differences  
1482 in weight between vehicle and PLX3397 treatment in male or female mice were evaluated by  
1483 two-way repeated measures ANOVA and *P* values are shown. In **b**, **e**, and **f**, each symbol  
1484 represents an individual mouse and the lines represent the group means.

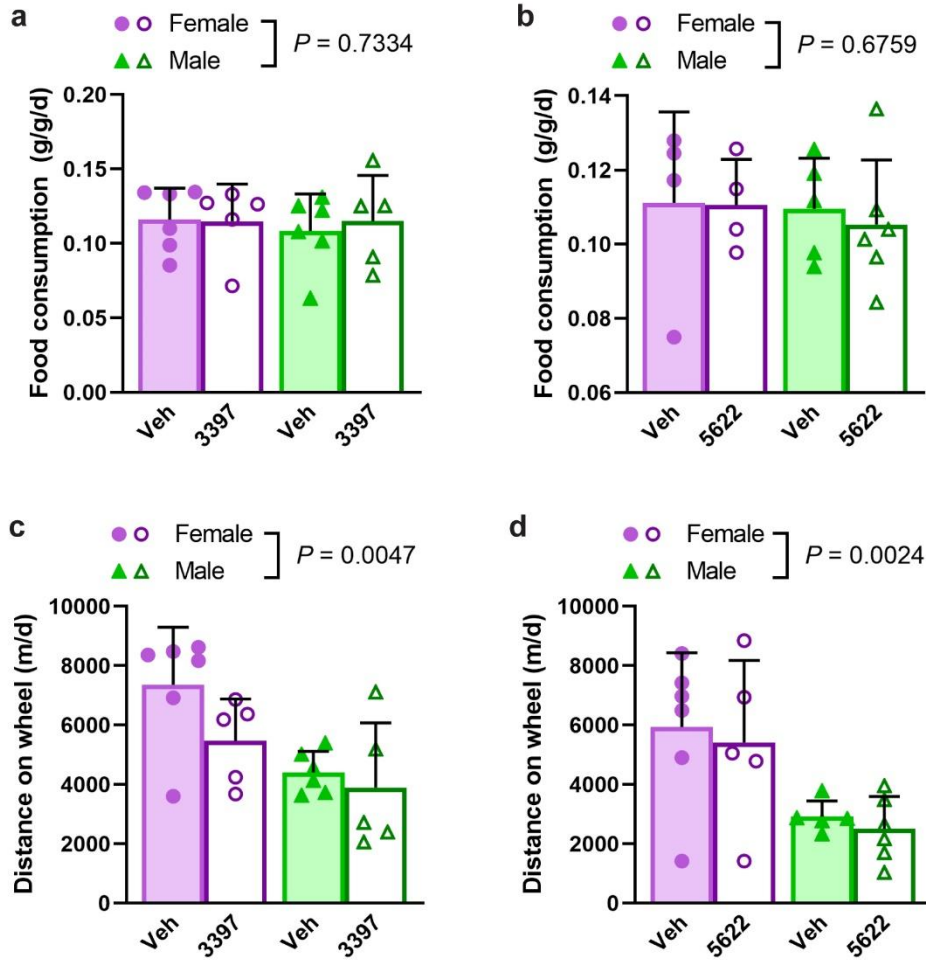

1485

1486 **Supplementary Fig. 10| Food consumption and activity of Tg2541 mice treated with**  
1487 **CSF1R inhibitors. a, b,** Food consumption measured in Tg2541 mice receiving terminal  
1488 treatment with vehicle or PLX3397 (275 mg/kg oral) (a), or vehicle or PLX5622 (1200 mg/kg  
1489 oral) (b), reported as grams of food per gram of mouse body weight per day (g/g/d). c, d,  
1490 Running wheel activity measured in Tg2541 mice receiving terminal treatment with vehicle or  
1491 PLX3397 (c), or vehicle or PLX5622 (d), reported as total distance traveled in meters per day  
1492 (m/d). In a-d, each symbol represents an individual mouse, with female mice shown as closed  
1493 or open circles and male mice shown as closed or open triangles. Error bars represent s.d. of  
1494 the mean. Two-way ANOVA was used to compare female and male mice and *P* values are  
1495 shown.

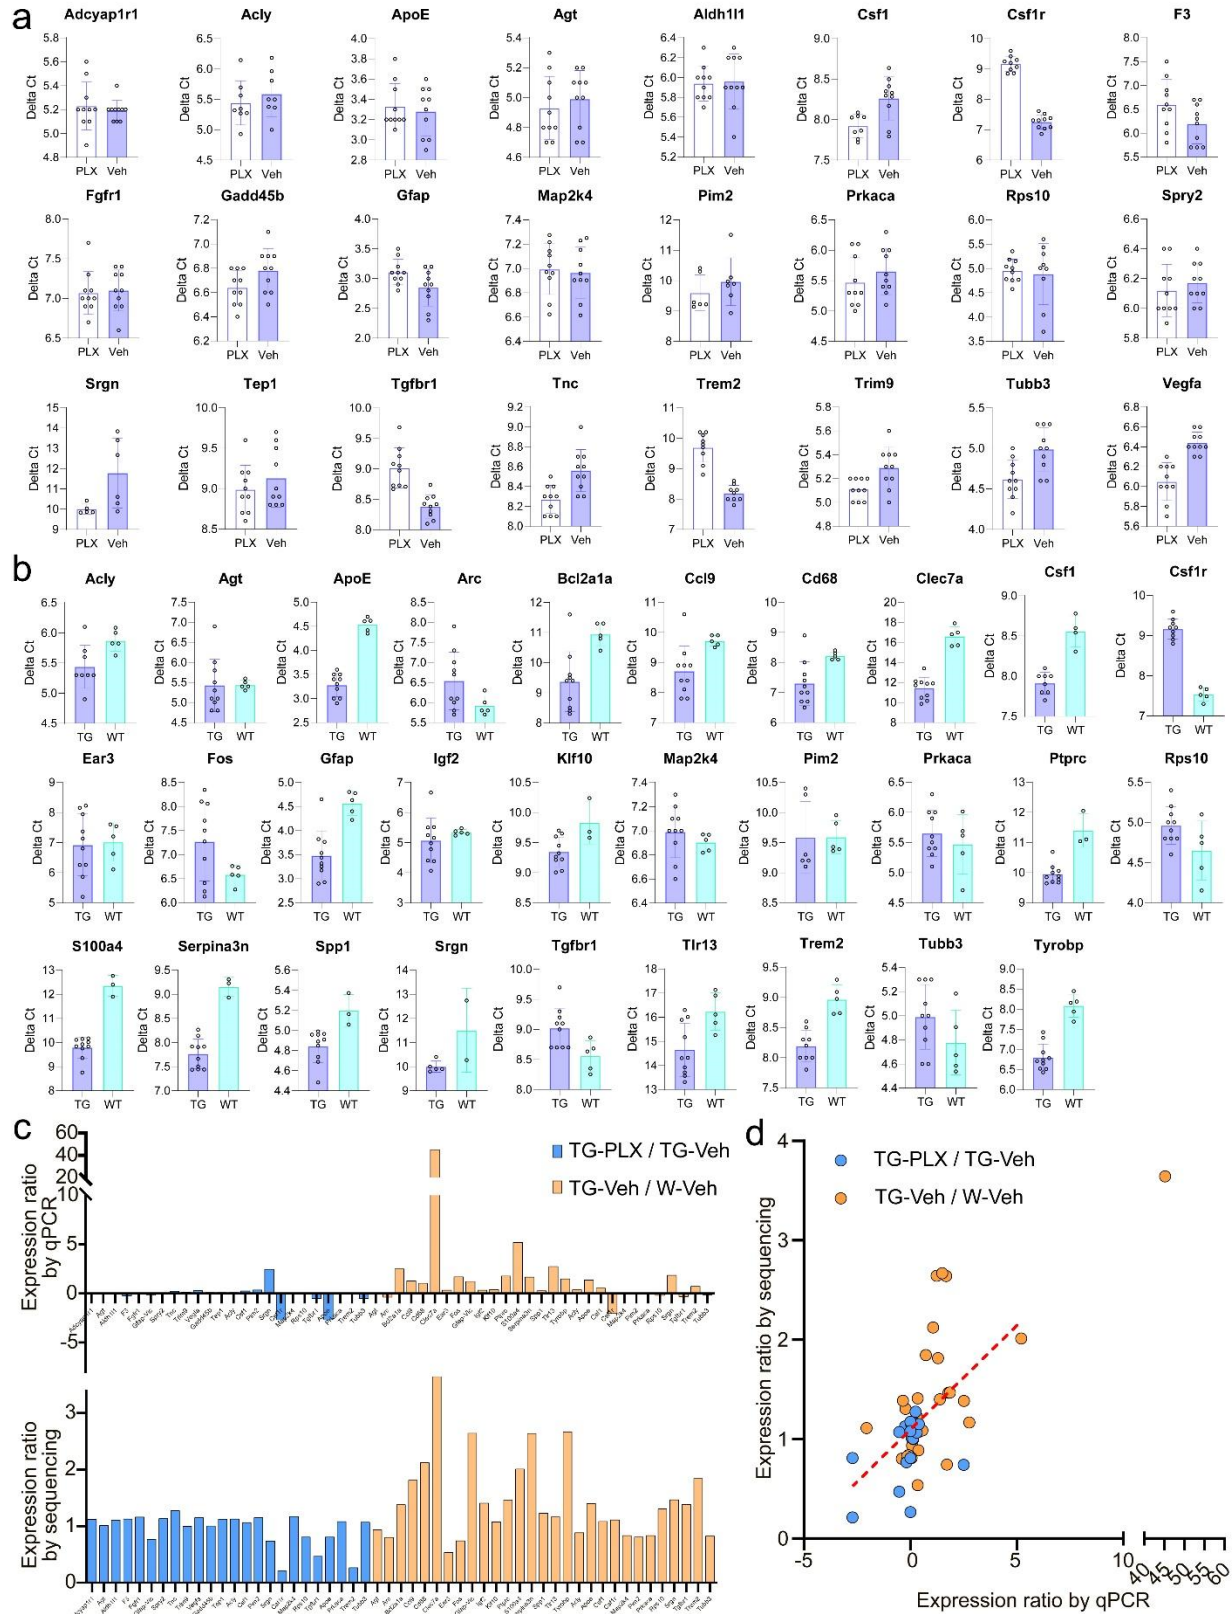

1496

1497

1498

**Supplementary Fig. 11| Validation of Nanostring sequencing results with real-time PCR.**

**a**, Delta Ct values of 24 selected genes in hindbrains of Tg2541 mice treated with PLX5622

1499 (1200 mg/kg) and vehicle. A lower Delta Ct reading indicates higher expression level. **b**, Delta  
1500 Ct values of 29 selected genes in hindbrains of Tg2541 and wild type mice treated with vehicle.  
1501 A lower Delta Ct reading indicates higher expression level. **c**, Expression ratios of the 53 genes  
1502 in **(a)** and **(b)** as measured by qPCR and Nanostring sequencing. **d**, Scatter plot of the data in  
1503 **(c)**. Red dotted line shows a linear trend line.



1505 **Supplementary Fig. 12| Gene expression pattern analyses of non-microglial and neuron-**  
1506 **specific genes. a–c**, Analyses similar to Fig. 6c–e, using (a) all non-microglial genes in  
1507 hindbrain, or neuron-specific genes in (b) forebrain and (c) hindbrain. **d–g**, Analyses similar to  
1508 Fig. 6g–j, using data from hindbrains.

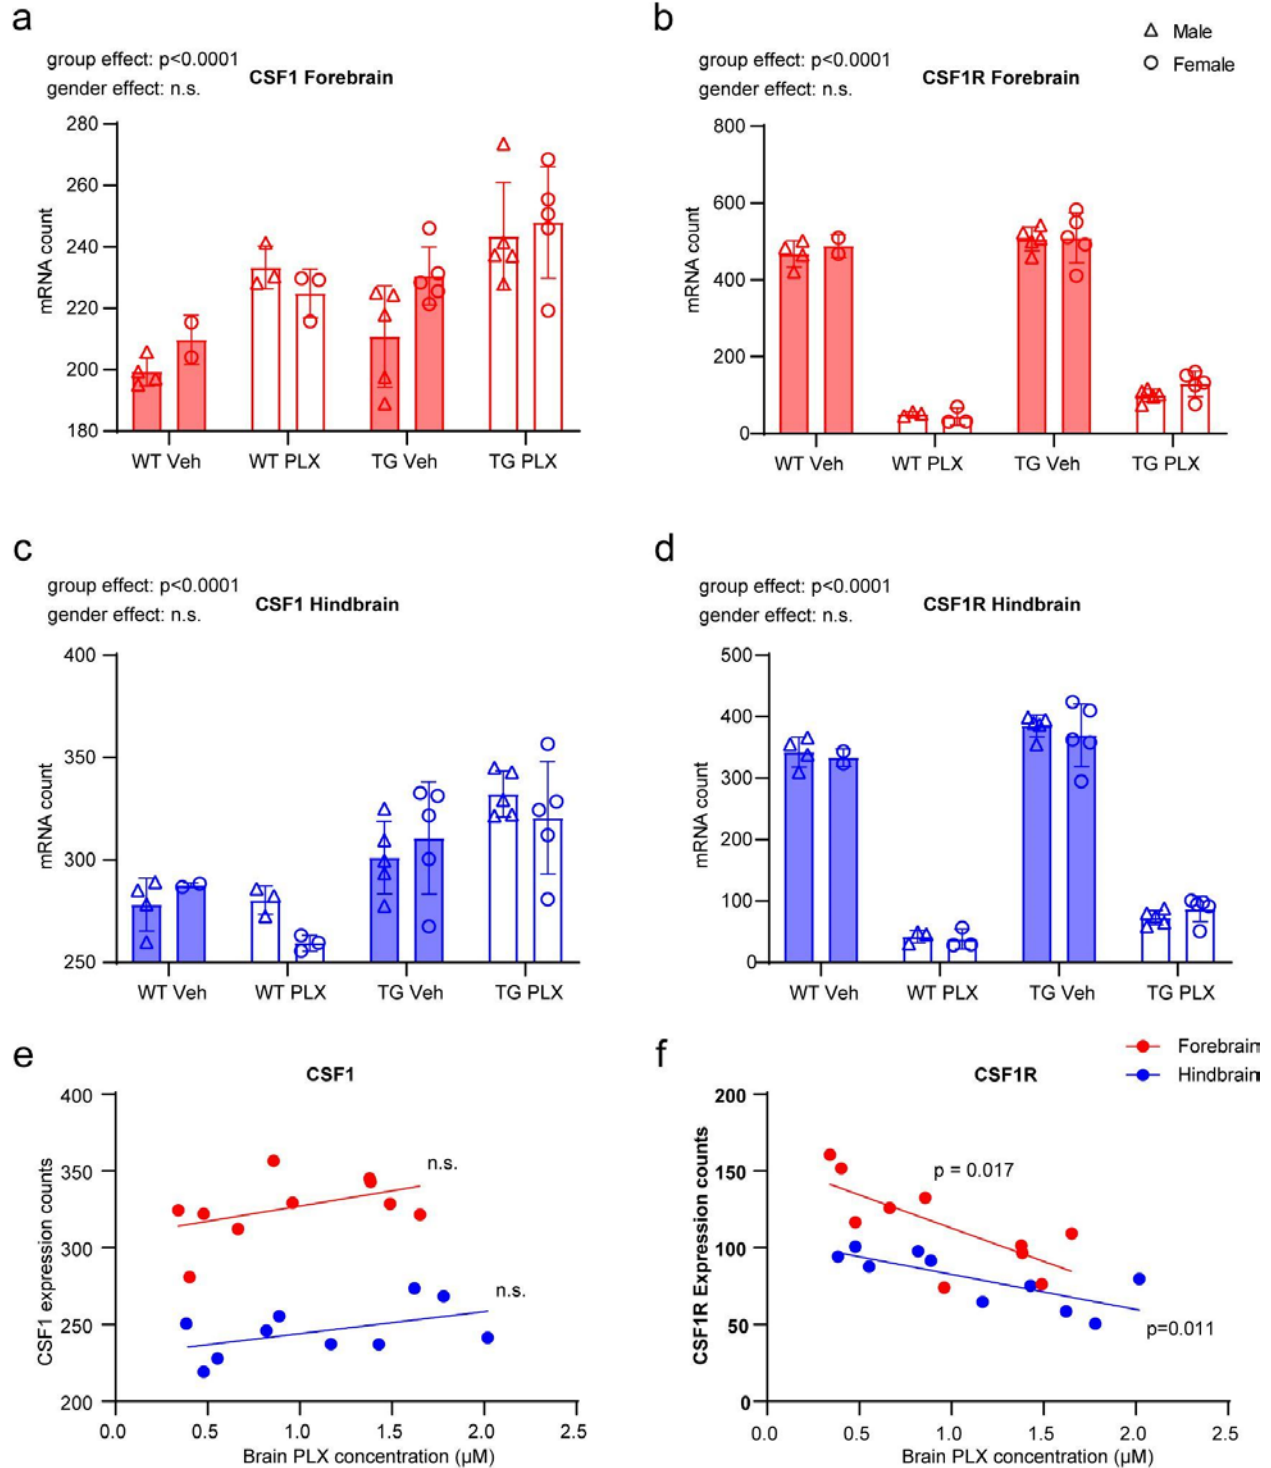

1509

1510 **Supplementary Fig. 13| PLX treatment led to increased CSF1 expression and decreased**  
1511 **CSF1R expression.** Quantification of CSF1 expression showed slight increase after PLX  
1512 treatment, while CSF1R expression showed marked decrease. Two-way ANOVA was used for



1513 statistical tests. Bottom panels showed scatter plots of brain PLX concentration against CSF1 or  
1514 CSF1R expression. Linear regressions were calculated for each group.

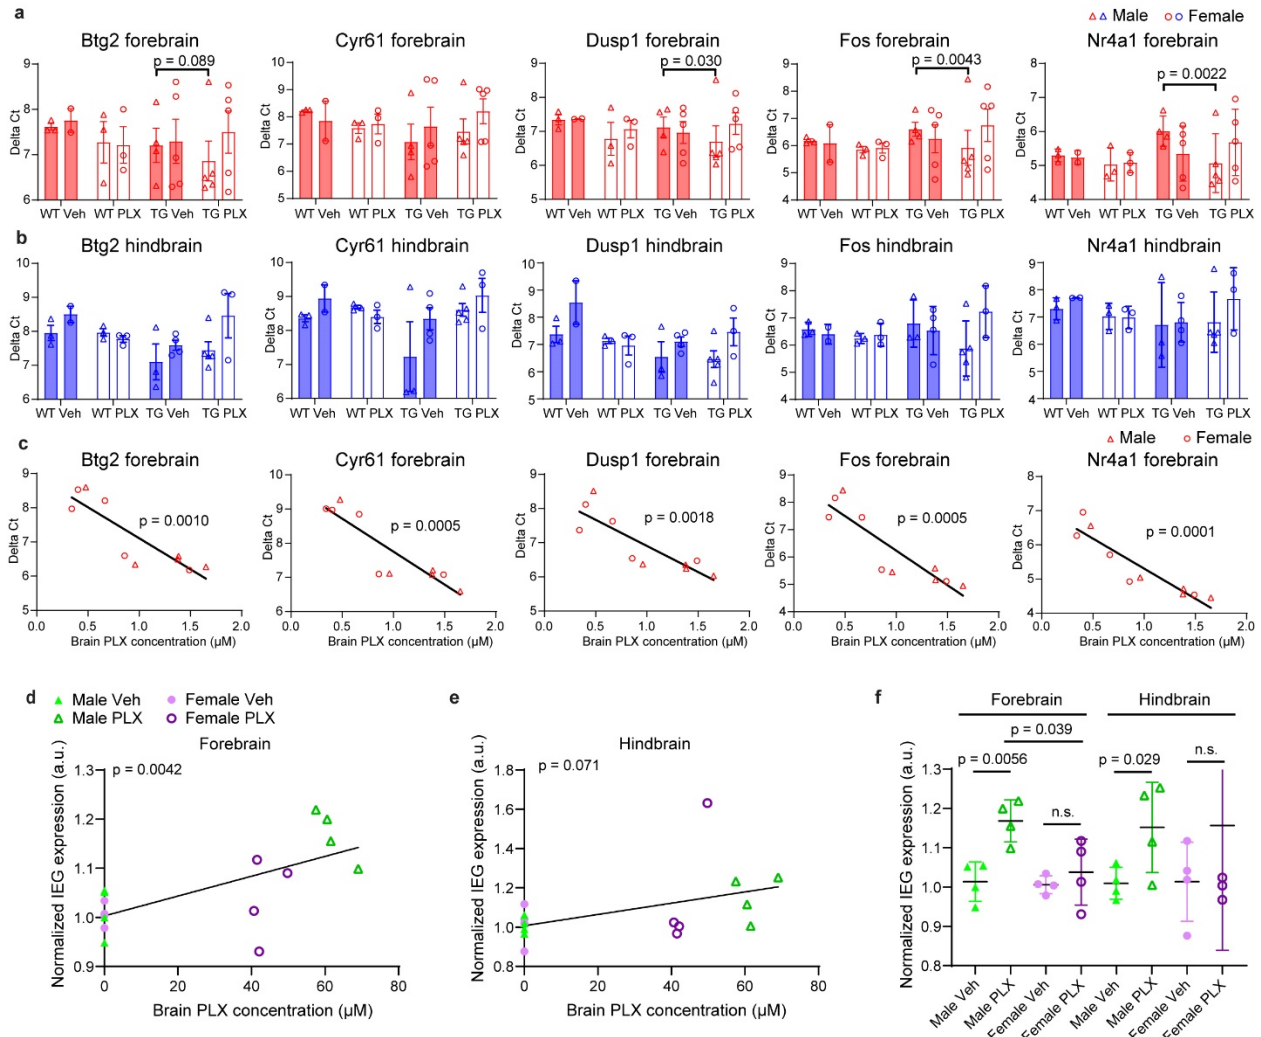

1515  
 1516 **Supplementary Fig. 14| Validation of IEG up-regulation following PLX treatment. a, b,**  
 1517 Real-time PCR quantifications of the mRNA levels of five IEGs in forebrains (a) and hindbrains  
 1518 (b) from PLX5622- or vehicle-treated Tg2541 or wildtype mice. c, Correlation of brain PLX  
 1519 concentration and expression levels from the five immediate early genes in the forebrains from  
 1520 PLX5622-treated Tg2541 mice. c, d, Correlation of brain PLX concentration and normalized  
 1521 expression levels from all immediate early genes (IEGs, 56 genes for each mouse) in the (d)  
 1522 forebrains and (e) hindbrains of vehicle- and PLX3397-treated Tg2541 mice. Pearson's  
 1523 correlation analysis was performed and the *P* values are shown. f, Quantification of normalized  
 1524 expression levels from all IEGs (56 genes for each mouse) in the forebrain and hindbrain of  
 1525 vehicle- and PLX3397-treated Tg2541 mice. Mann-Whitney tests were used for comparisons  
 1526 between groups. Each symbol represents an individual mouse.

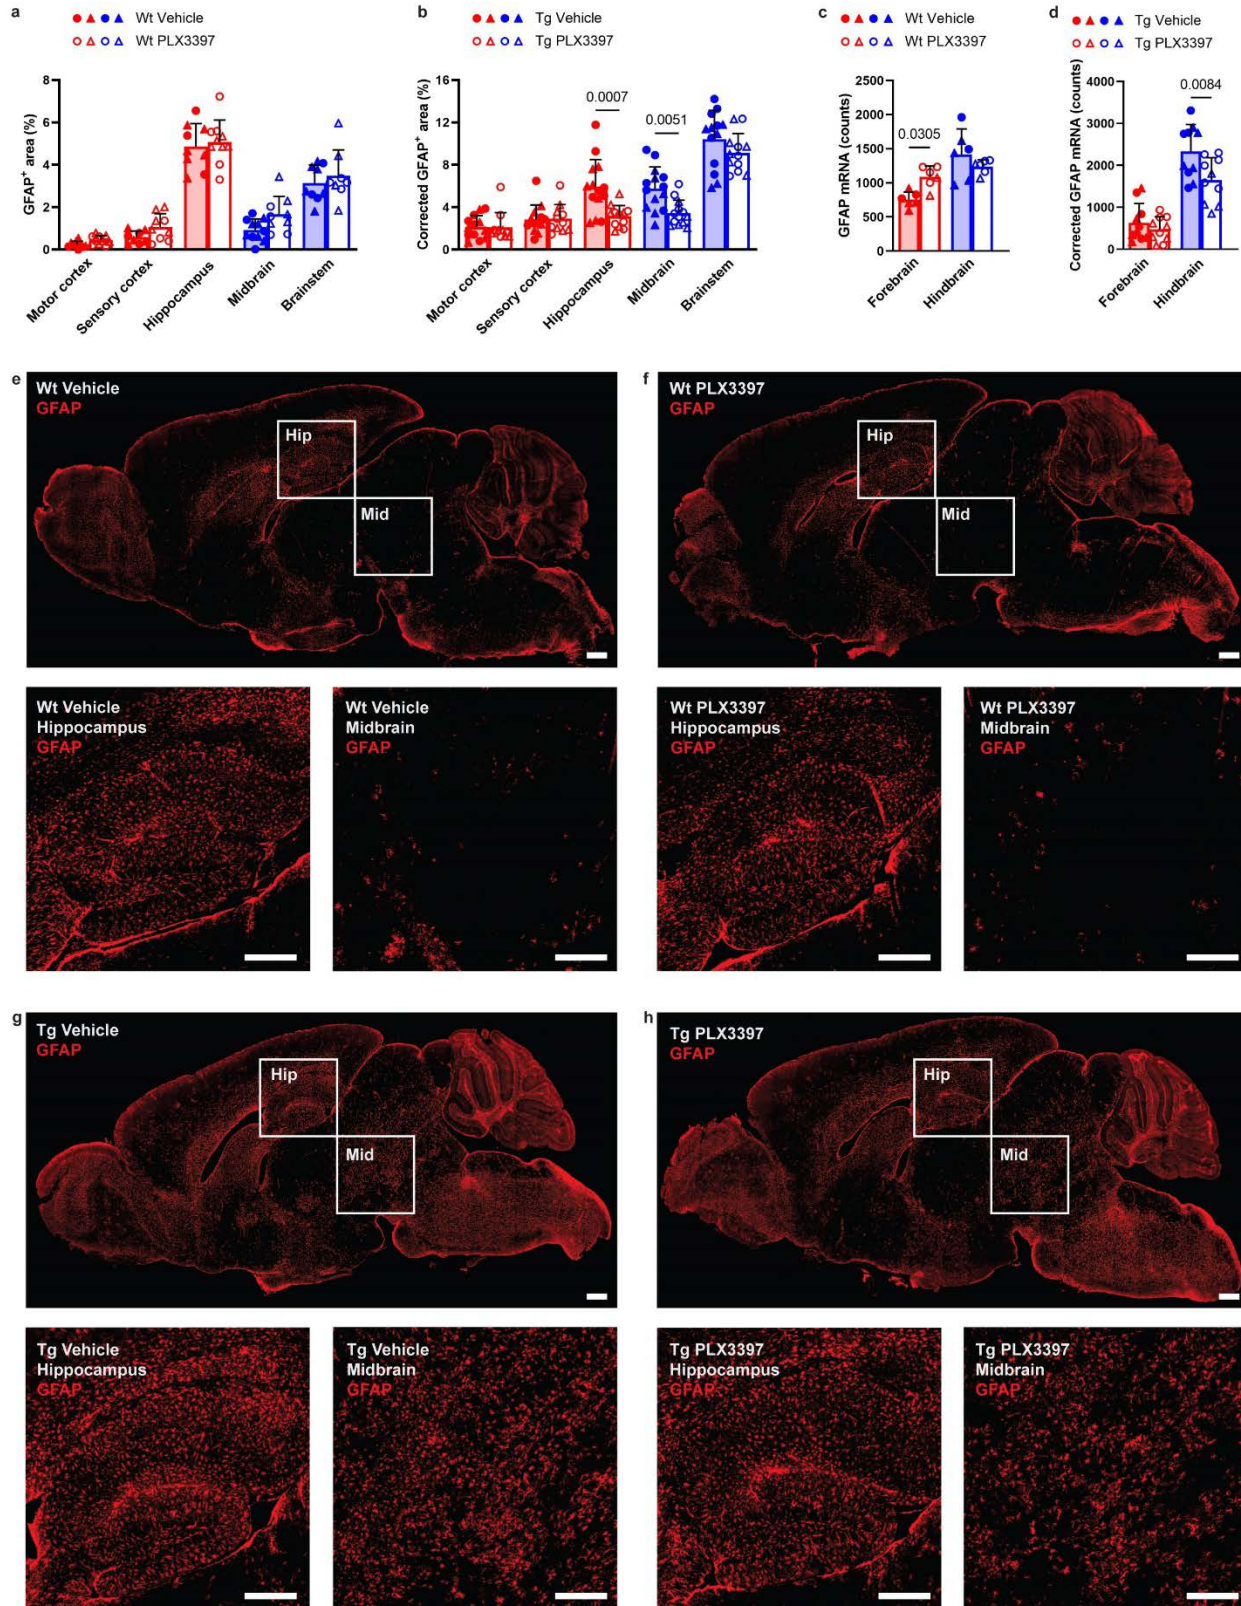

1527

1528

1529

**Supplementary Fig. 15| GFAP expression is reduced by PLX3397 treatment in Tg2541 mice. a, b, GFAP levels measured by IHC in five different brain regions, three forebrain regions**

1530 and two hindbrain regions, of **(a)** wild type (Wt) and **(b)** Tg2541 mice treated with PLX3397 (275  
1531 mg/kg oral) or vehicle. GFAP levels in Tg2541 mice were corrected for the average levels in  
1532 each brain region of PLX3397- and vehicle-treated Wt mice. **c, d**, GFAP mRNA levels  
1533 measured by Nanostring in the forebrain or hindbrain of **(c)** wild type and **(d)** Tg2541 mice  
1534 treated with PLX3397 (275 mg/kg oral) or vehicle. GFAP mRNA levels in Tg2541 mice were  
1535 corrected for the average levels in each brain region of PLX3397- and vehicle-treated Wt mice.  
1536 In **a-d**, Two-way ANOVA with Holm-Šidák post hoc testing was used to evaluate the differences  
1537 between vehicle- and PLX3397-treated groups within each brain region and *P* values of  
1538 statistically significant differences ( $P < 0.05$ ) are shown. Each symbol represents an individual  
1539 mouse with female mice shown as closed or open circles and male mice shown as closed or  
1540 open triangles. **e-h**, Representative GFAP IHC images of a brain section from **(e)** a Wt vehicle-  
1541 treated mouse, **(f)** a Wt PLX3397-treated mouse, **(g)** a Tg2541 vehicle-treated mouse, and **(h)** a  
1542 Tg2541 PLX3397-treated mouse. High-magnification images of the indicated hippocampus  
1543 (Hip) and midbrain (Mid) regions are shown below each image. Scale bars, 500  $\mu\text{m}$ .

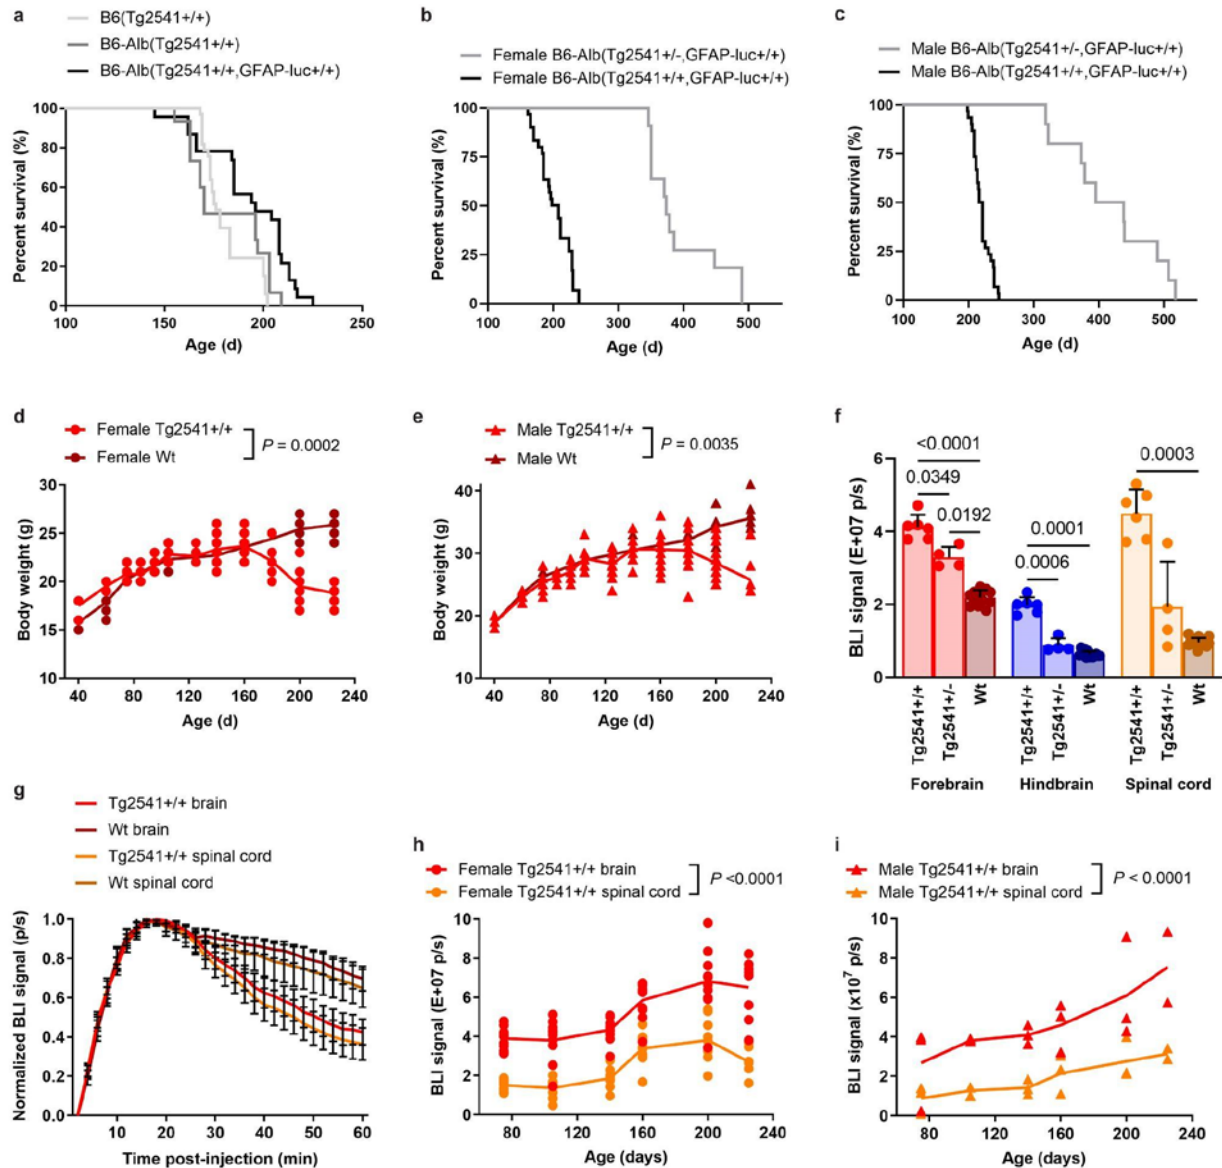

1544

1545 **Supplementary Fig. 16| Generation, optimization, and validation of bigenic Tg2541/GFAP-**

1546 **luciferase mice for in vivo bioluminescent imaging (BLI) of astrocytosis. a,** Kaplan-Meier

1547 plot shows that the survival curve (kinetics of disease) is unchanged for Tg2541 homozygous

1548 mice bred to B6-albino background and homozygous for the reporter GFAP-luciferase

1549 transgene. **b, c,** Kaplan-Meier plots for **(b)** female and **(c)** male mice showing that survival

1550 curves of homozygous and hemizygous B6-albino bigenic Tg2541 mice is not sex-dependent;

1551 homozygous Tg2541 mice have a median survival of 212 days, and hemizygous Tg2541 mice

1552 have a median survival of 378 days. **d, e,** As a crude surrogate of general health, longitudinal

1553 measurements of mouse body weight (grams) shows that in contrast to Wt mice, **(d)** female and

1554 **(e)** male Tg2541 mice lose weight as a result of decreased food intake from increasing

1555 paraparesis with disease progression. Because earlier studies gave a standard volume of d-  
1556 luciferin substrate regardless of changes in individual mouse weight, we optimized the protocol  
1557 to give a 25mg/kg of CycLuc1 to increase consistency in BLI measurements. **f**, To validate the  
1558 GFAP-luciferase reporter gene and the synthetic luciferin substrate (CycLuc1) *in vivo*, we  
1559 performed BLI in Tg2541 homozygous mice (~200 days old) with advanced disease pathology  
1560 and showed the BLI signal is significantly increased in the forebrain, hindbrain and spinal cord  
1561 as compared to similar aged Tg2541 hemizygous and Wt mice. Welch ANOVA with Dunnett T3  
1562 post hoc testing was used to compare groups and *P* values for all statistically significant  
1563 differences ( $P < 0.05$ ) are shown. Error bars represent the s.d. of the mean. **g**, Time-lapse  
1564 imaging (two-minute intervals) of BLI signal from brain and spinal cord in Tg and Wt mice  
1565 showed that peak BLI signal occurred between 14 and 20 minutes after CycLuc1 injection to the  
1566 peritoneum. Thus, to decrease variability in our study, we collect images at 14, 16, and 18  
1567 minutes post-injection and average all three time points to account for subtle differences in time  
1568 of injection and individual mouse pharmacokinetic of CycLuc1. **h**, **i**, Longitudinal BLI plots in (**h**)  
1569 female and (**i**) male mice show kinetics of gliosis in the Tg2541 brain and spinal cord (3 mice  
1570 per field of view). **j**, Example image of the field of view (magnification) used to capture both the  
1571 brain and spinal cord in three mice per time point. In **d**, **e**, **h**, and **i**, differences between groups  
1572 were evaluated by repeated measures ANOVA and *P* values are shown. Each symbol  
1573 represents an individual mouse and lines indicate group means.

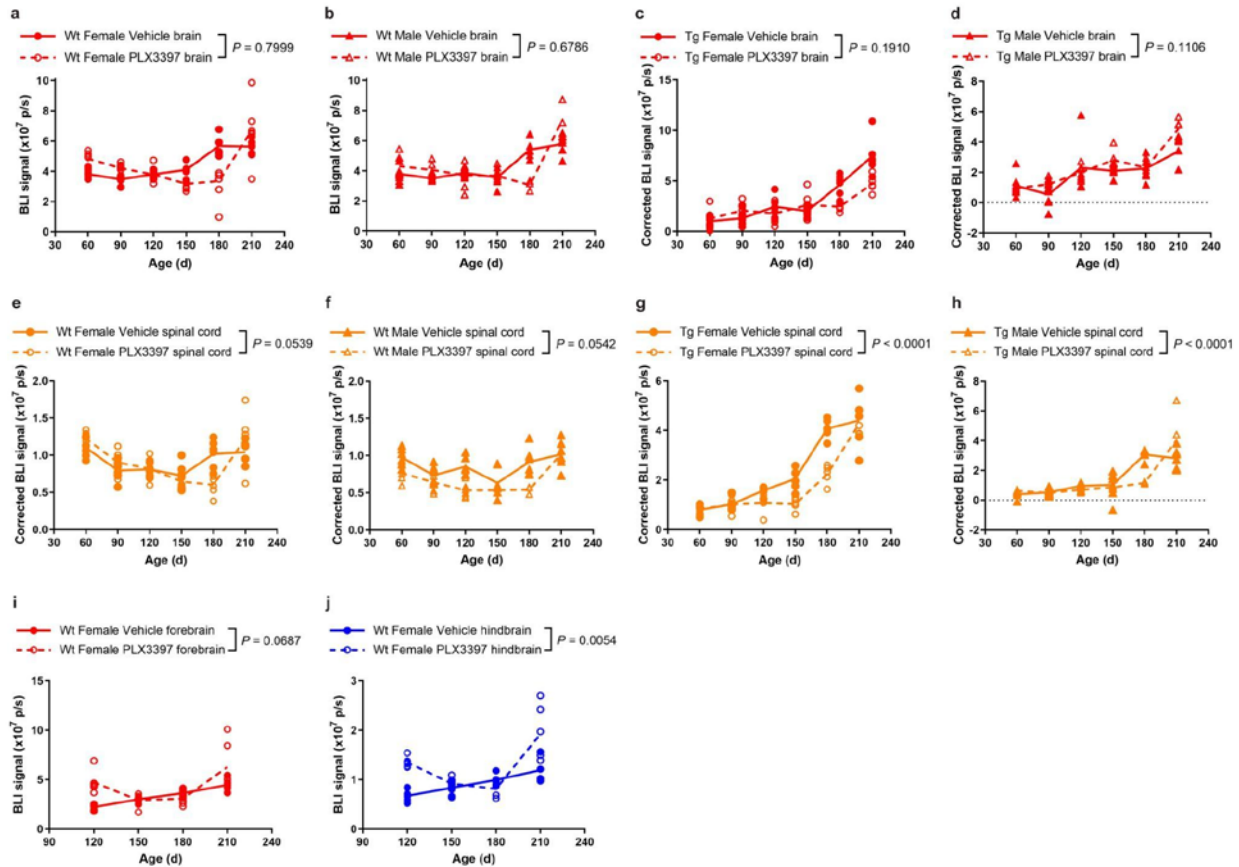

1574

1575 **Supplementary Fig. 17| Brain and spinal cord BLI of PLX3397-treated wild type and**  
 1576 **Tg2541 mice. a, b,** Longitudinal brain BLI plots of (a) female and (b) male wild type (Wt) mice  
 1577 treated with PLX3397 (275 mg/kg oral) or vehicle. **c, d,** Longitudinal brain BLI plots of (c) female  
 1578 and (d) male Tg2541 mice (Tg) treated with PLX3397 (275 mg/kg oral) or vehicle. The data  
 1579 were corrected for brain BLI levels of PLX3397- and vehicle-treated Wt mice, shown in **a** and **b**.  
 1580 Due to resolution and/or sensitivity of this magnification, we did not observe any differences  
 1581 between PLX3397 and vehicle groups. Higher magnification imaging on single mice from the  
 1582 same cohort was performed as shown in Fig. 7e-g. **e, f,** Longitudinal spinal cord BLI plots of (e)  
 1583 female and (f) male Wt mice treated with PLX3397 (275 mg/kg oral) or vehicle. **g, h,**  
 1584 Longitudinal spinal cord BLI plots of (g) female and (h) male Tg2541 mice (Tg) treated with  
 1585 PLX3397 (275 mg/kg oral) or vehicle. The data were corrected for spinal cord BLI levels of  
 1586 PLX3397- and vehicle-treated Wt mice, shown in **e** and **f**. **i, j,** High magnification BLI plots of the  
 1587 (i) forebrain and (j) hindbrain of female Wt mice treated with PLX3397 (275 mg/kg oral) or  
 1588 vehicle, and used to correct the BLI data of female Tg2541 mice presented in Fig. 7f,g. In **a-j**,  
 1589 differences between vehicle and PLX3397 treatment were evaluated by repeated measures  
 1590 ANOVA and  $P$  values are shown. Each symbol represents an individual mouse and lines

1591 indicate group means.





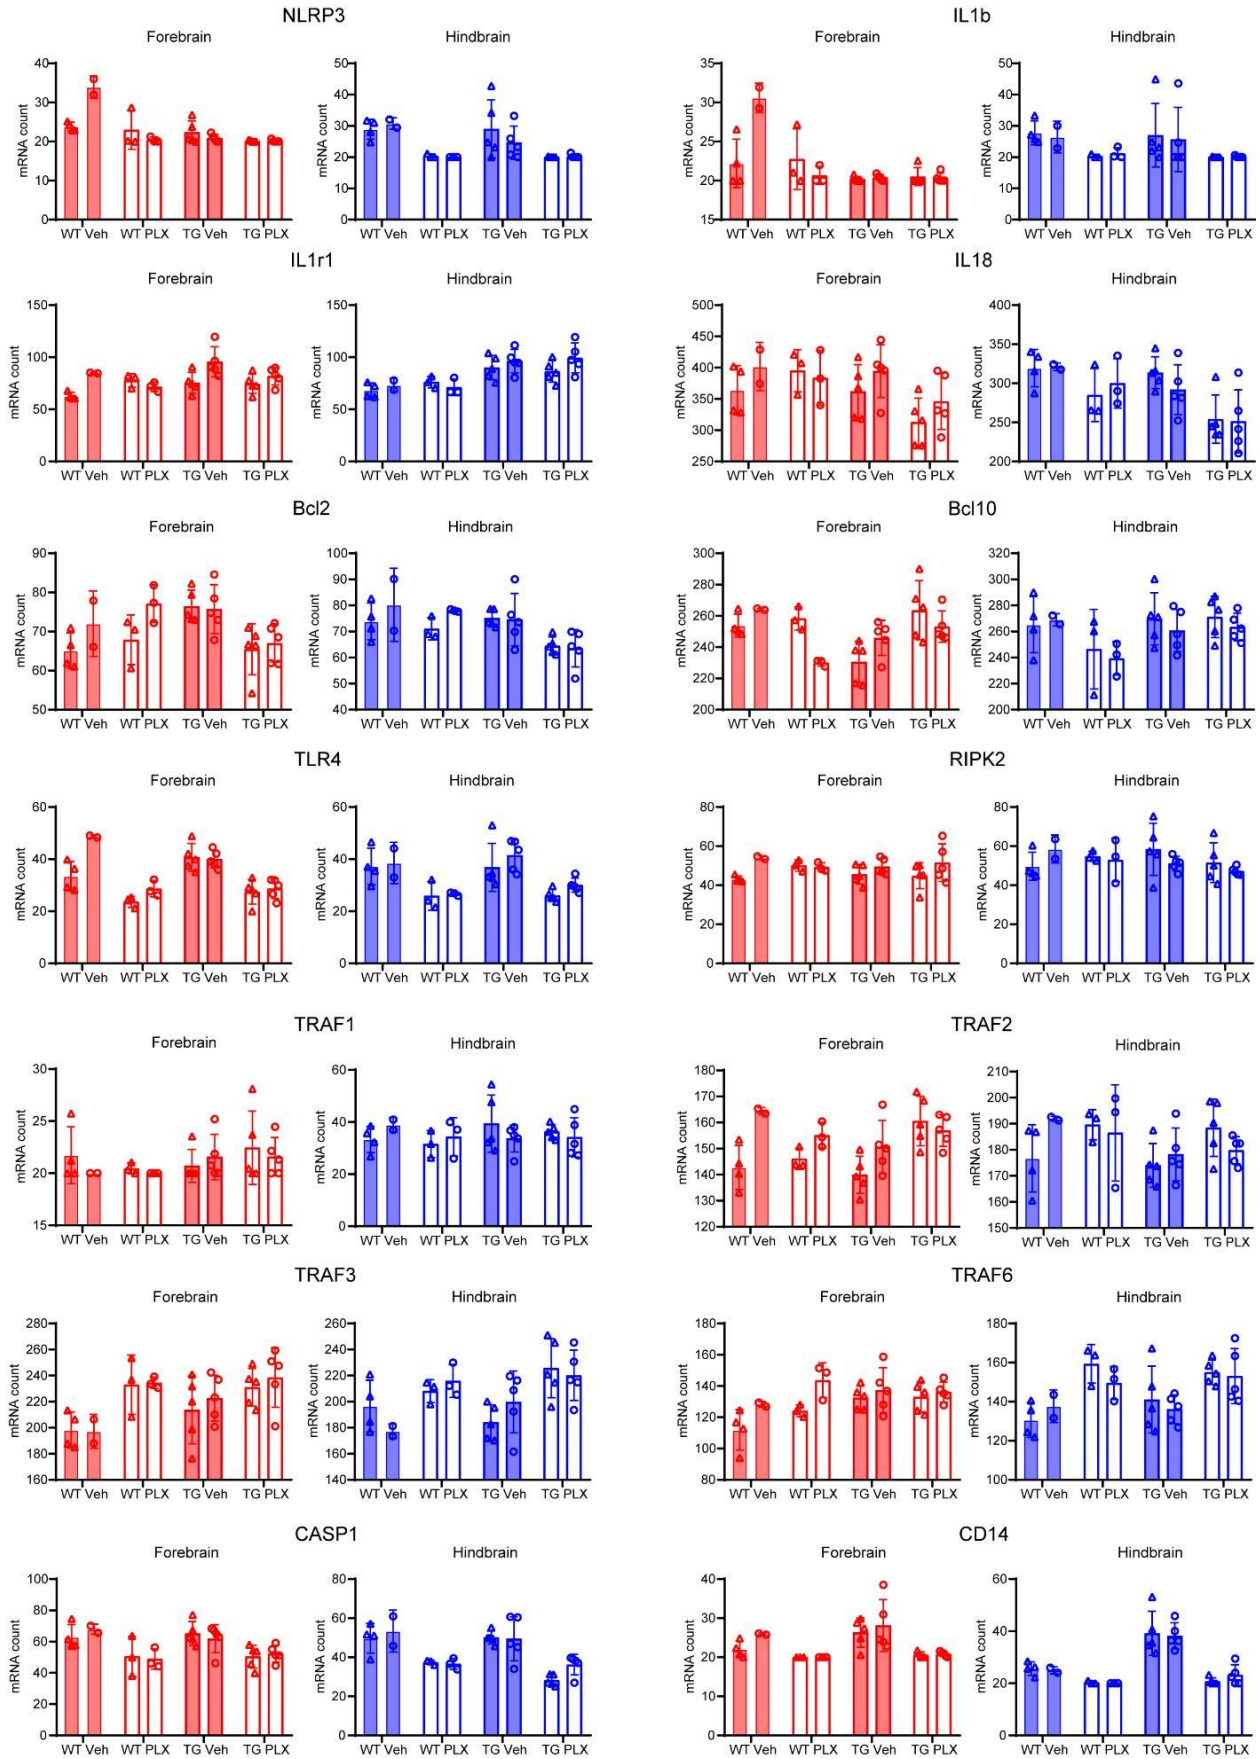

1597 **Supplementary Fig. 19| Tau pathology or PLX treatment did not lead to marked alteration**  
1598 **of inflammasome-related genes.** Quantification of 14 inflammasome-related genes in different  
1599 experimental groups.

1600 **Supplementary Data File 1| Statistical tests of sex-specific drug effects on microglia, tau,**  
1601 **and neurons. a,** Statistical test results for 3-way ANOVA analyses for each figure panel where  
1602 female and male mice were combined. Statistical test results include the type III sum-of-squares  
1603 (SS), the F statistic, and the *P* value for the main effect of sex and for the sex\*drug interaction  
1604 effect. **b, c,** Statistical test results for 2-way ANOVA analyses for **(b)** female or **(c)** male mice  
1605 separately, for each figure panel where female and male mice were combined. Statistical test  
1606 results include the type III sum-of-squares (SS), the F statistic, and the *P* value for the main  
1607 effect of drug, and the *P* value for the multiple comparisons post-hoc testing of each drug  
1608 compared to the vehicle in the forebrain, hindbrain, or spinal cord. 'na' indicates that the data is  
1609 not available because the drug was not tested in that particular experiment.

1610

1611 **Supplementary Data File 2| Differentially expressed genes in male and female PLX-**  
1612 **treated Tg2541 mice.** Forebrain samples from male and female Tg2541 mice were analyzed  
1613 for gene expression by Nanostring following chronic treatment with PLX5622. The data  
1614 represent the average expression levels of five male and five female mice, which were then  
1615 compared by unpaired t-test and the *P* value is shown. Please note that the entire transcriptome  
1616 dataset which also includes hindbrain data, wild type mice, and vehicle-treated mice are  
1617 available from Github with the following link: [https://gitfront.io/r/user-](https://gitfront.io/r/user-8849465/665dd65fd9d9e78650ed02b9f30236d99240de39/UCSF-PLX-nanostring/)  
1618 [8849465/665dd65fd9d9e78650ed02b9f30236d99240de39/UCSF-PLX-nanostring/](https://gitfront.io/r/user-8849465/665dd65fd9d9e78650ed02b9f30236d99240de39/UCSF-PLX-nanostring/)

1619
